# Supplementary material
Source: PubMed Central journal article supplement (PMC2820637)
Supplement: mmc1.pdf [file mmc1.pdf]

Biophysical Journal, Volume 98

**Supporting Material**

**Thermo- and mesostabilizing protein interactions identified by temperature dependent statistical potentials**

Benjamin Folch, Yves Dehouck, and Marianne Rooman

## **Supporting Material**

Appendix S1 – [Amino acid groups](#) [p. 1]

Appendix S2 – [Statistical Criterion to identify differences between potentials](#) [p. 2]

Table S1 – [Characteristics of the datasets after refinement](#) [p. 3]

Table S2 – [Amino acid composition in each dataset](#) [p. 4]

Table S3 – [Characteristics of the complete protein dataset](#) [p. 5-8]

Table S4 – [List of proteins in each refined subset](#) [p. 9]

Table S5 – [Amino acid groups](#) [p. 10]

Table S6 – [Details on all pairs of amino acids and amino acid groups satisfying our statistical significance criteria](#) [p. 11-14]

Table S7 – [Details on linear correlations between folding free energies  \$\Delta W\$  and melting temperatures  \$T\_m\$  in eight protein families](#) [p. 15]

Figures S1 – [Illustration of the two statistical criteria used to identify the differences between the potentials derived from the two protein subsets, in the case of the D-R interaction](#) [p. 16]

Figures S2-S56 – [Thermostabilizing interaction potentials](#) [p. 17-35]

Figures S57-S86 – [Mesostabilizing interaction potentials](#) [p. 36-45]

Table S8 – [Contact potentials for all thermostabilizing and mesostabilizing interactions given in Tables 1-2](#) [p. 46]

## Appendix S1 – Amino acid groups

Due to the limited number of proteins of known structure and melting temperature, the frequencies that are derived from our datasets are not always statistically significant, especially for infrequent pairs. We therefore decided to consider, in addition to the 20 amino acids, several groups of similar amino acids, as given in Table S3. To compute meaningful frequencies and potentials, we need to define the spatial distances  $d$  between groups of amino acids. Therefore, when computing the distances  $d$  between  $C_{\mu}$  pseudoatoms, we took into account the radii of the amino acids they contain<sup>(\*)</sup>, and shifted all distances towards smaller distances by subtracting the difference in radii between the amino acids considered and the smallest amino acids in the groups. More precisely, consider the two groups  $\mathbf{v}$  and  $\mathbf{w}$  which contain the residues  $V_{\alpha}$  ( $\alpha=0, \dots, m$ ) and  $W_{\beta}$  ( $\beta=0, \dots, n$ ), and denote  $V_0$  and  $W_0$  the smallest amino acids of their respective groups. The normalized distance  $d$  that enters in the frequencies and potentials are the distances between the  $C_{\mu}$  atoms of the residues  $V_{\alpha}$  and  $W_{\beta}$ , minus the radii of  $V_{\alpha}$  and  $W_{\beta}$ , plus the radii of  $V_0$  and  $W_0$ . When computing the distances  $d$  between  $C_{\nu}$  pseudoatoms, this normalization was only performed in the groups of small and aliphatic residues, where the  $C_{\mu}$  and  $C_{\nu}$  are identical. We computed distance potentials between pairs of groups, between single amino acids and groups, and between pairs of amino acids.

\* Levitt M. 1976. A simplified representation of protein conformations for rapid simulation of protein folding. *J. Mol. Biol.* 104:59-107.

## Appendix S2 – Statistical criterion to identify differences between potentials

To analyze the temperature dependence of the interactions, we compared the potentials derived from the subsets of mesostable and thermostable proteins. If these potentials are sufficiently different, we conclude that the interactions they represent depend on the melting temperature. Two criteria were used to evaluate if potentials are sufficiently different; they are illustrated in Fig. S1. The first criterion is based on the area of the surface between the two curves representing the potentials as a function of the interresidue distance, over the whole distance range considered (between the centers of the two extreme distance bins: from 3.25 Å to 8.65 Å). We give this surface area a positive sign when the curve computed from the thermostable set is below that of the mesostable set, and a negative sign otherwise. This surface area is denoted  $A_{\text{total}}$ .

The second criterion focuses on the differences around the minima of the potentials. The minima are first identified on the potential derived from the reference dataset by an automatic procedure: an energy minimum is detected in bin  $b$  if the energy value is higher in the two flanking bins  $b-1$  and  $b+1$ . The distance range over which the difference in surface area is computed is defined by considering the two intersection points, at the right and left hand sides of the minimum, between the two potentials derived from the mesoresistant and thermoresistant subsets, as illustrated in Fig. S1. If no intersection point is found, the limits are the edges of the complete distance range (3.25 Å and 8.65 Å). We then compute the area, denoted  $A_{\text{min}}$ , of the surface contained between the curves of the mesoresistant and thermoresistant potentials, limited by these two intersection points. Note that there may be several minima in each potential; in this case the criterion is applied separately to each minimum.

To evaluate the significance of the differences between the potentials, we created 1000 random pairs of protein subsets. Each pair was generated by randomly assigning 83 of the 166 proteins to one subset and the 83 others to the other subset. The random pairs of subsets so created were kept only if their average melting temperatures differ by less than 3°C. We also excluded the proteins whose sequence is too similar ( $\geq 25\%$ ) to another protein of the subset, as explained above for the reference set.

To estimate whether the differences observed in a given potential are statistically significant and may be related to differences in  $\bar{T}_m$ , we computed the percentages  $P_{\text{total}}$  and  $P_{\text{min}}$  of the 1000 random pairs of subsets for which the surface areas  $A_{\text{total}}$  and  $A_{\text{min}}$  are larger than or equal to the corresponding surface areas obtained from the mesostable and thermostable protein sets. If  $P_{\text{total}}$  is lower than 10% and  $P_{\text{min}}$  lower than 20%, the difference between the potentials extracted from mesostable and thermostable proteins was considered as statistically significant. These values were lowered to 5% and 10%, respectively, for the potentials involving two groups of amino acids.

**Table S1 – Characteristics of the datasets after refinement**

| <i>Data sets</i>    | <i># proteins</i> | $\bar{T}_m$ | <i>pH</i>            |          | <i># residues</i>             |          |
|---------------------|-------------------|-------------|----------------------|----------|-------------------------------|----------|
|                     |                   |             | $\langle pH \rangle$ | $\sigma$ | $\langle \# residues \rangle$ | $\sigma$ |
| Mesostable subset   | 65                | 51.8        | 6.8                  | 1.2      | 224.4                         | 124.1    |
| Reference set       | 115               | 65.3        | 6.8                  | 1.2      | 208.7                         | 121.8    |
| Thermostable subset | 65                | 79.1        | 6.9                  | 1.3      | 182.2                         | 114.2    |

**Table S2 – Amino acid composition in each dataset**

| <b>Residue name</b> | <b>Mesostable subset (%)</b> | <b>Reference set (%)</b> | <b>Thermostable subset (%)</b> |
|---------------------|------------------------------|--------------------------|--------------------------------|
| A                   | 8.44                         | 8.44                     | 7.93                           |
| R                   | 3.97                         | 4.2                      | 5.02                           |
| N                   | 5.17                         | 4.99                     | 4.79                           |
| D                   | 6.4                          | 6.45                     | 6.37                           |
| C                   | 1.1                          | 1.34                     | 1.62                           |
| Q                   | 4.25                         | 4.03                     | 3.49                           |
| E                   | 5.67                         | 5.68                     | 6.62                           |
| G                   | 8.21                         | 8.25                     | 7.99                           |
| H                   | 1.96                         | 2.05                     | 2.13                           |
| I                   | 4.9                          | 5.1                      | 5.44                           |
| L                   | 8.92                         | 8.36                     | 8.02                           |
| K                   | 6.21                         | 6.15                     | 6.5                            |
| M                   | 1.69                         | 1.81                     | 2                              |
| F                   | 4.04                         | 3.93                     | 4.03                           |
| P                   | 4.49                         | 4.47                     | 4.31                           |
| S                   | 6.78                         | 6.58                     | 6.01                           |
| T                   | 6.09                         | 5.85                     | 5.25                           |
| W                   | 1.55                         | 1.58                     | 1.69                           |
| Y                   | 3.61                         | 4.04                     | 4.22                           |
| V                   | 6.55                         | 6.69                     | 6.6                            |

**Table S3 – Characteristics of the complete protein dataset**

| PDB* code | $T_m$ ( $\sigma$ ) <sup>†</sup> (°C) | pH   | Protein name                          | Resolution (Å) | Host organism                         | Number of residues | Reference(s)                                                                                                                                                             |
|-----------|--------------------------------------|------|---------------------------------------|----------------|---------------------------------------|--------------------|--------------------------------------------------------------------------------------------------------------------------------------------------------------------------|
| 1fga      | 39.45                                | 6.60 | Fibroblast growth factor              | 2.20           | <i>Human (homo sapiens)</i>           | 124                | BIOCHEMISTRY 39, 7153-7158 (2000);                                                                                                                                       |
| 1hml      | 39.50                                | 7.00 | Alpha lactalbumin                     | 1.70           | <i>Human (homo sapiens)</i>           | 123                | BIOCHEMISTRY 28, 8568-8576 (1989);                                                                                                                                       |
| 1rg8      | 40.25 (0.45)                         | 7.30 | Acidic fibroblast growth factor       | 1.10           | <i>Human (homo sapiens)</i>           | 141                | PROTEIN ENG DES SEL 17, 603-611 (2004);                                                                                                                                  |
| 1ihb      | 41.53                                | 7.50 | Cyclin-dependent kinase inhibitor     | 1.95           | <i>Human (homo sapiens)</i>           | 156                | J BIOL CHEM 277, 48827-48833 (2002);                                                                                                                                     |
| 1blc      | 41.60                                | 7.50 | Beta lactamase                        | 2.20           | <i>Staphylococcus aureus</i>          | 257                | BIOCHEMISTRY 33, 116-125 (1994);                                                                                                                                         |
| 1d0b      | 42.10                                | 7.50 | Internalin b                          | 1.86           | <i>Listeria monocytogenes</i>         | 207                | J MOL BIOL 337, 453-461 (2004);                                                                                                                                          |
| 1chk      | 43.20                                | 7.00 | Chitosanase                           | 2.40           | <i>Streptomyces lividans</i>          | 238                | BIOCHIM BIOPHYS ACTA 1429, 365-376 (1999);                                                                                                                               |
| 1p3j      | 43.30                                | 7.40 | Adenylate kinase                      | 1.90           | <i>Bacillus subtilis</i>              | 212                | J BIOL CHEM 279, 28202-28208 (2004);                                                                                                                                     |
| 1aqh      | 44.00                                | 7.20 | Alpha-amylase                         | 2.00           | <i>Alteromonas haloplantis</i>        | 448                | J BIOL CHEM 276 25791-25796 (2001);                                                                                                                                      |
| 1rtp      | 45.80                                | 7.40 | Parvalbumin                           | 2.00           | <i>Bos taurus</i>                     | 109                | FEBS LETT 442, 241-245 (1999);                                                                                                                                           |
| 1ttq      | 46.00                                | 7.80 | Tryptophan synthase alpha subunit     | 2.00           | <i>Salmonella typhimurium</i>         | 256                | BIOCHEM BIOPHYS RES COMMUN 151, 672-678 (1988);                                                                                                                          |
| 1orc      | 46.40                                | 7.00 | Cro repressor                         | 1.54           | <i>Bacteriophage lambda</i>           | 64                 | FEBS LETT 289 201-204 (1991);                                                                                                                                            |
| 1efc      | 46.50                                | 7.60 | EF-tu elongation factor               | 2.02           | <i>Escherichia coli</i>               | 386                | PROTEIN SCI 13, 89-99 (2004);                                                                                                                                            |
| 2ci2      | 46.60                                | 6.30 | Chymotrypsin inhibitor                | 2.00           | <i>Hordeum vulgare</i>                | 65                 | BIOCHEMISTRY 34, 1695-1701 (1995);                                                                                                                                       |
| 1bu7      | 47.00                                | 7.40 | Cytochrome p450                       | 1.65           | <i>Bacillus megaterium</i>            | 455                | J BIOL CHEM 278, 608-616 (2003);                                                                                                                                         |
| 1s3g      | 47.60                                | 7.40 | Adenylate kinase                      | 2.25           | <i>Bacillus globisporus</i>           | 217                | J BIOL CHEM 279, 28202-28208 (2004);                                                                                                                                     |
| 1aky      | 47.70                                | 7.50 | Adenylate kinase                      | 1.96           | <i>Saccharomyces cerevisiae</i>       | 218                | EUR J BIOCHEM 231, 405-413 (1995);                                                                                                                                       |
| 1mve      | 48.00                                | 7.00 | Truncated glucanase                   | 1.70           | <i>Fibrobacter succinogenes</i>       | 238                | BIOCHEMISTRY 44, 9197-9205 (2005);                                                                                                                                       |
| 1lni      | 48.16 (0.61)                         | 7.00 | Ribonuclease sa                       | 1.00           | <i>Streptomyces aureofaciens</i>      | 96                 | BIOCHEMISTRY 37, 16192-16200 (1998);PROTEIN SCI 8, 1843-1849 (1999);J BIOL CHEM 278, 31790-31795 (2003);PROTEIN SCI 12, 2367-2373 (2003);J MOL BIOL 354, 967-978 (2005); |
| 1oa3      | 49.20                                | 8.00 | Cel12a                                | 1.70           | <i>Hypocrea schweinitzii</i>          | 217                | PROTEIN SCI 12, 848-860 (2003);                                                                                                                                          |
| 1rm1      | 49.55 (1.25)                         | 7.00 | Ribonuclease t1                       | 1.84           | <i>Aspergillus oryzae</i>             | 104                | J BIOL CHEM 264, 11621-11625 (1989);;                                                                                                                                    |
| 2cpp      | 50.15                                | 7.40 | Cytochrome p450                       | 1.63           | <i>Pseudomonas putida</i>             | 405                | BIOCHEMISTRY 45, 12715-12722 (2006);                                                                                                                                     |
| 1rx4      | 50.20                                | 7.80 | Dihydrofolate reductase               | 2.20           | <i>Escherichia coli</i>               | 159                | J BIOL CHEM 282, 9420-9429 (2007);                                                                                                                                       |
| 1kfw      | 50.50                                | 7.50 | Chitinase                             | 1.74           | <i>Arthrobacter sp.</i>               | 435                | PROTEIN ENG 16, 497-503 (2003);                                                                                                                                          |
| 1cpm      | 50.80                                | 6.00 | Glucanase                             | 2.00           | <i>Paenibacillus macerans</i>         | 214                | PROTEIN SCI 5, 2255-2265 (1996);                                                                                                                                         |
| 1pii      | 51.00                                | 7.40 | Anthranilate isomerase                | 2.00           | <i>Escherichia coli</i>               | 452                | BIOCHEMISTRY 33, 6350-6355 (1994);                                                                                                                                       |
| 1bmc      | 51.03                                | 7.00 | Beta lactamase                        | 2.50           | <i>Bacillus cereus</i>                | 213                | BIOCHEMISTRY 31, 6603-6607 (1992);                                                                                                                                       |
| 1wlg      | 51.10                                | 7.00 | Flagellar hook protein                | 1.80           | <i>Salmonella typhimurium</i>         | 293                | J MOL BIOL 251, 520-532 (1995);                                                                                                                                          |
| 1ayf      | 51.39                                | 8.50 | Adrenodoxin                           | 1.85           | <i>Bos taurus</i>                     | 102                | PROTEIN SCI 5, 1890-1897 (1996);                                                                                                                                         |
| 1ank      | 51.80                                | 7.20 | Adenylate kinase                      | 2.00           | <i>Escherichia coli</i>               | 214                | J BIOL CHEM 266, 23654-23659 (1991);                                                                                                                                     |
| 1bd8      | 51.90                                | 7.50 | Cyclin-dependent kinase inhibitor p19 | 1.80           | <i>Human (homo sapiens)</i>           | 156                | J MOL BIOL 315 447-457 (2002);                                                                                                                                           |
| 2fal      | 52.00                                | 7.00 | Myoglobin                             | 1.80           | <i>Sea hare (aplysia limacina)</i>    | 146                | J MOL BIOL 297, 1231-1244 (2000);                                                                                                                                        |
| 1ew4      | 52.07 (1.29)                         | 7.00 | Frataxin cyay                         | 1.40           | <i>Escherichia coli</i>               | 106                | J MOL BIOL 336, 203-212 (2004);BIOCHEMISTRY 43, 6511-6518 (2004);                                                                                                        |
| 9mt       | 52.10                                | 7.00 | Rnase t1                              | 1.50           | <i>Aspergillus oryzae</i>             | 104                | BIOCHEMISTRY 33, 3312 (1994);                                                                                                                                            |
| 1am7      | 52.30                                | 7.00 | Lysozyme                              | 2.30           | <i>Bacteriophage lambda</i>           | 150                | FEBS LETT 460, 442-446 (1999);                                                                                                                                           |
| 1avr      | 52.50                                | 8.00 | Annexin v                             | 2.30           | <i>Human (homo sapiens)</i>           | 317                | BIOCHEMISTRY 36, 1657-1668 (1997);                                                                                                                                       |
| 1h12      | 52.60                                | 7.50 | Xylanase 8                            | 1.20           | <i>Pseudoalteromonas haloplanktis</i> | 404                | J BIOL CHEM 277, 35133-35139 (2002);                                                                                                                                     |
| 2fx5      | 53.00                                | 5.80 | Lipase                                | 1.80           | <i>Pseudomonas mendocina</i>          | 258                | PROTEIN SCI 15, 1915-1927 (2006) PMID: 16823035;                                                                                                                         |
| 2nhv      | 53.00                                | 3.00 | Interleukin 1 beta                    | 1.53           | <i>Human (homo sapiens)</i>           | 153                | BIOCHEMISTRY 33, 9327-9332 (1994);                                                                                                                                       |
| 2m2       | 53.10                                | 5.00 | Ribonuclease hi                       | 1.48           | <i>Escherichia coli</i>               | 155                | EUR J BIOCHEM 220, 623-631 (1994);                                                                                                                                       |
| 5pep      | 53.10 (0.50)                         | 8.00 | Pepsin                                | 2.34           | <i>Porcine (sus scrofa)</i>           | 326                | BIOCHEMISTRY 39, 4182-4190 (2000);                                                                                                                                       |
| 1ey0      | 53.15 (0.15)                         | 7.00 | Staphylococcal nuclease               | 1.60           | <i>Staphylococcus aureus</i>          | 136                | PROTEIN SCI 4, 2545-2558 (1995);J MOL BIOL 303, 125-130 (2000);                                                                                                          |
| 1abe      | 53.57                                | 7.40 | Arabinose binding protein             | 1.70           | <i>Escherichia coli</i>               | 305                | J BIOL CHEM 258, 13193-13198 (1983);                                                                                                                                     |
| 1rro      | 53.60                                | 7.40 | Beta-parvalbumin                      | 1.30           | <i>Rat (rattus rattus)</i>            | 108                | FEBS LETT 442, 241-245 (1999);                                                                                                                                           |
| 1yea      | 53.63 (0.90)                         | 6.00 | Iso-2 cytochrome c                    | 1.90           | <i>Saccharomyces cerevisiae</i>       | 112                | BIOCHEMISTRY 33, 9209-9219 (1994);BIOCHEMISTRY 35, 1995-2007 (1996);PROTEIN SCI 9, 536-543 (2000);                                                                       |
| 1e21      | 53.70                                | 5.00 | Ribonuclease a                        | 1.90           | <i>Human (homo sapiens)</i>           | 119                | PROTEIN ENG 15, 887-893 (2002);                                                                                                                                          |

|      |              |      |                                             |      |                                           |     |                                                                                                                                           |
|------|--------------|------|---------------------------------------------|------|-------------------------------------------|-----|-------------------------------------------------------------------------------------------------------------------------------------------|
| 2acy | 53.80        | 5.50 | Acylphosphatase                             | 1.80 | <i>Bos taurus</i>                         | 98  | PROTEINS 62, 64-79 (2006);                                                                                                                |
| 1csp | 53.80        | 7.00 | Cold shock protein                          | 2.50 | <i>Bacillus subtilis</i>                  | 67  | J MOL BIOL 347, 1063-1076 (2005);                                                                                                         |
| 1hxn | 53.90        | 7.40 | Hemopexin                                   | 1.80 | <i>Oryctolagus cuniculus</i>              | 209 | BIOCHEMISTRY 32, 7216-7222 (1993);                                                                                                        |
| 1bni | 54.00        | 7.00 | Barnase                                     | 2.10 | <i>Bacillus amyloliquefaciens</i>         | 108 | BIOCHEMISTRY 34, 5224-5233 (1995);                                                                                                        |
| 1h8v | 54.50        | 8.00 | Cel12a                                      | 1.90 | <i>Trichoderma reesei</i>                 | 217 | PROTEIN SCI 12, 2782-2793 (2003);                                                                                                         |
| 1ke4 | 54.60        | 6.80 | Beta lactamase                              | 1.72 | <i>Escherichia coli</i>                   | 357 | PROTEIN SCI 8, 1816-1824 (1999);                                                                                                          |
| 1oxa | 55.00        | 7.40 | Cytochrome p450                             | 2.10 | <i>Saccaropolyspora erythraea</i>         | 403 | J BIOL CHEM 278, 608-616 (2003);                                                                                                          |
| 3pgk | 56.15        | 7.00 | Phosphoglycerate kinase                     | 2.50 | <i>Saccharomyces cerevisiae</i>           | 415 | BIOCHEMISTRY 28, 813-818 (1989);                                                                                                          |
| 1hfv | 56.20        | 7.40 | Alpha lactalbumin                           | 2.30 | <i>Bos taurus</i>                         | 123 | PROTEIN ENG 12, 581-587 (1999);                                                                                                           |
| 2rbi | 56.50        | 6.20 | Binase                                      | 2.20 | <i>Bacillus intermedius</i>               | 108 | FEBS LETT 445, 384-388 (1999);                                                                                                            |
| 1mjc | 56.94 (0.99) | 7.00 | Cold shock protein                          | 2.00 | <i>Escherichia coli</i>                   | 69  | PROTEIN SCI 9, 387-394 (2000);PROTEIN SCI 10 2028-2036 (2001);                                                                            |
| 3sil | 57.00        | 7.00 | Sialidase                                   | 1.05 | <i>Salmonella typhimurium</i>             | 381 | PROTEIN ENG 14 891-896 (2001);                                                                                                            |
| 1ten | 57.10        | 5.00 | Tenascin                                    | 1.80 | <i>Human (homo sapiens)</i>               | 90  | BIOCHEMISTRY 37, 8071-8079 (1998);                                                                                                        |
| 1lmb | 57.20        | 7.00 | Lambda repressor                            | 1.70 | <i>Phage lambda</i>                       | 80  | BIOCHEMISTRY 41, 5359-5374 (2002);                                                                                                        |
| 1ftg | 57.35 (0.05) | 7.00 | Apoflavodoxin                               | 2.00 | <i>Anabaena PCC7119</i>                   | 168 | PROTEIN SCI 5, 1376-1388 (1996);                                                                                                          |
| 3psg | 57.50        | 7.10 | Pepsinogen                                  | 1.65 | <i>Porcine (sus scrofa)</i>               | 365 | J MOL BIOL 152 445-464 (1981);                                                                                                            |
| 1tca | 57.70        | 7.00 | Lipase b                                    | 1.55 | <i>Candida antarctica</i>                 | 317 | PROTEIN ENG 16, 599-605 (2003);                                                                                                           |
| 1pmk | 57.80        | 7.00 | Plasminogen kringle 4 domain                | 2.25 | <i>Human (homo sapiens)</i>               | 78  | BIOCHEMISTRY 32, 8799-8806 (1993);                                                                                                        |
| 1v0s | 57.80        | 5.50 | Phospholipase d                             | 1.75 | <i>Streptomyces septatus</i>              | 495 | BIOCHIM BIOPHYS ACTA 1696, 75-82 (2004);                                                                                                  |
| 1qlp | 58.87 (0.66) | 7.80 | Alpha1-antitrypsin                          | 2.00 | <i>Human (homo sapiens)</i>               | 372 | J MOL BIOL 313 1161-1169 (2001);BIOCHEMISTRY 41, 4575-4581 (2002);J MOL BIOL 325, 581-589 (2003);                                         |
| 1avu | 59.00        | 7.00 | Kunitz type soybean trypsin inhibitor (sti) | 2.30 | <i>Glycine max</i>                        | 172 | BIOCHEMISTRY 41, 5359-5374 (2002);                                                                                                        |
| 2cab | 59.00        | 6.10 | Carbonic hydrase b                          | 2.00 | <i>Human (homo sapiens)</i>               | 256 | BIOCHEMISTRY 44, 5258-5266 (2005);                                                                                                        |
| 2a01 | 59.20 (0.75) | 7.40 | Apolipoprotein a-i                          | 2.40 | <i>Human (homo sapiens)</i>               | 243 | J MOL BIOL 378, 264-272 (2008);BIOCHEMISTRY 39, 15910-15919 (2000);BIOCHEMISTRY 41, 10529-10539 (2002);BIOCHEMISTRY 45, 1242-1254 (2006); |
| 1wq5 | 59.50        | 7.20 | Tryptophan synthase alpha subunit           | 2.30 | <i>Escherichia coli</i>                   | 258 | ARCH BIOCHEM BIOPHYS 292, 34-41 (1992);                                                                                                   |
| 1ekg | 60.00        | 7.00 | Fratxin                                     | 1.80 | <i>Human (homo sapiens)</i>               | 119 | BIOCHEMISTRY 43, 6511-6518 (2004);                                                                                                        |
| 1ycc | 60.00        | 6.00 | Iso-1 cytochrome c                          | 1.23 | <i>Saccharomyces cerevisiae</i>           | 108 | PROTEIN SCI 8, 2645-2654 (1999);                                                                                                          |
| 1rhg | 60.95        | 6.90 | Granulocyte colony stimulating factor       | 2.20 | <i>Human (homo sapiens)</i>               | 145 | BIOCHEMISTRY 41, 6422-6431 (2002);                                                                                                        |
| 1akd | 61.00        | 7.40 | Cytochrome p450                             | 1.80 | <i>Pseudomonas putida</i>                 | 405 | J BIOL CHEM 278, 608-616 (2003);                                                                                                          |
| 1w2p | 61.20        | 7.00 | Xylanase 10                                 | 1.45 | <i>Cellvibrio japonicus</i>               | 346 | J MOL BIOL 279, 54369-54379 (2004);                                                                                                       |
| 1xyp | 61.40        | 5.00 | Xylanase ii                                 | 1.50 | <i>Trichoderma reesei</i>                 | 189 | J BIOTECHNOL 108, 137-143 (2004);                                                                                                         |
| 1esf | 61.40        | 7.00 | Enterotoxin a                               | 1.90 | <i>Staphylococcus aureus</i>              | 229 | J BIOL CHEM 275, 1665-1672 (2000);                                                                                                        |
| 6taa | 62.00        | 7.00 | Taka-amylase                                | 2.10 | <i>Aspergillus oryzae</i>                 | 476 | BIOCHEMISTRY 26, 4063-4068 (1987);                                                                                                        |
| 1shg | 62.00        | 7.00 | Sh3 spectrin                                | 1.80 | <i>Escherichia coli</i>                   | 57  | J MOL BIOL 357, 1592-1604 (2006) PMID: 16487539;                                                                                          |
| 1qwo | 62.50        | 5.00 | Phytase atcc                                | 1.50 | <i>Aspergillus fumigatus</i>              | 435 | PROT ENG 13, 49-57 (2000);                                                                                                                |
| 1rtb | 62.80        | 7.10 | Ribonuclease a                              | 2.50 | <i>Bos taurus</i>                         | 124 | BIOCHEMISTRY 45, 10795-10806 (2006);                                                                                                      |
| 1poh | 63.40        | 7.00 | Histidine-containing phosphocarrier protein | 2.00 | <i>Escherichia coli</i>                   | 85  | J MOL BIOL 286, 1609-1619 (1999);                                                                                                         |
| 3rn3 | 63.60        | 7.00 | Rnase a                                     | 1.45 | <i>Bos taurus</i>                         | 124 | PROTEIN SCI 8, 832-840 (1999);                                                                                                            |
| 1tpk | 64.30        | 4.50 | Tissue plasminogen activator                | 2.40 | <i>Human (homo sapiens)</i>               | 88  | BIOCHEMISTRY 28, 4047-4054 (1989);                                                                                                        |
| 1bk7 | 64.40        | 7.50 | Rnase mc1                                   | 1.75 | <i>Momordica charantia (seeds bitter)</i> | 190 | BIOSCI BIOTECHNOL BIOCHEM 68, 1748-1757 (2004);                                                                                           |
| 1fna | 64.40        | 7.40 | Fibronectin (10th type iii module)          | 1.8  | <i>Human (homo sapiens)</i>               | 91  | J MOL BIOL 217, 563-575 (1991);                                                                                                           |
| 3mbp | 64.60        | 7.00 | Maltose-binding protein                     | 1.70 | <i>Escherichia coli</i>                   | 370 | PROTEINS 53, 863-871 (2003);                                                                                                              |
| 1wdn | 64.65 (1.55) | 8.30 | Glutamine-binding protein                   | 1.94 | <i>Escherichia coli</i>                   | 223 | PROTEINS 58, 80-87 (2005);PROTEINS 58, 80-87 (2005);                                                                                      |
| 2lzm | 64.85 (0.15) | 6.50 | Lysozyme                                    | 1.70 | <i>Escherichia coli</i>                   | 164 | NATURE 334, 406-410 (1988);PROC NATL ACAD SCI U S A 85, 401-405 (1988);                                                                   |
| 1lz1 | 64.90        | 2.70 | Lysozyme                                    | 1.50 | <i>Human (homo sapiens)</i>               | 130 | J MOL BIOL 254, 62-76 (1995);                                                                                                             |
| 1sup | 65.00        | 7.00 | Subtilisin bpn                              | 1.60 | <i>Bacillus amyloliquefaciens</i>         | 275 | J BIOL CHEM 277, 27553-27558 (2002);                                                                                                      |
| 4blm | 65.00        | 7.00 | Beta lactamase                              | 2.00 | <i>Bacillus licheniformis</i>             | 256 | BIOCHEMISTRY 29, 5797-5806 (1990);                                                                                                        |
| 1tgn | 65.50 (0.50) | 4.20 | Trypsinogen                                 | 1.65 | <i>Bos taurus</i>                         | 222 | J MOL BIOL 247, 701-716 (1995);                                                                                                           |
| 1ppi | 65.60        | 7.20 | Alpha-amylase                               | 2.20 | <i>Porcine (sus scrofa)</i>               | 496 | J BIOL CHEM 276 25791-25796 (2001);                                                                                                       |
| 1jae | 65.90        | 7.20 | Alpha-amylase                               | 1.65 | <i>Tenebrio molitor</i>                   | 470 | BIOCHEMISTRY 38, 4613-4619 (1999);                                                                                                        |



|      |              |      |                                                |      |                                            |     |                                                                                                                                                               |
|------|--------------|------|------------------------------------------------|------|--------------------------------------------|-----|---------------------------------------------------------------------------------------------------------------------------------------------------------------|
| 1g6n | 66.40        | 7.00 | Catabolite activator protein                   | 2.1  | <i>Escherichia coli</i>                    | 200 | BIOCHEMISTRY 27, 5257-5261 (1988);                                                                                                                            |
| 1oa4 | 66.80        | 8.00 | Cel12a                                         | 1.50 | <i>Streptomyces sp. 11ag8</i>              | 222 | PROTEIN SCI 12, 848-860 (2003);                                                                                                                               |
| 1gwy | 67.00        | 7.50 | Sticholysin                                    | 1.71 | <i>Stoichactis helianthus</i>              | 175 | FEBS LETT 575, 14-18 (2004);                                                                                                                                  |
| 1cyo | 67.10 (0.44) | 7.00 | Cytochrome b5                                  | 1.50 | <i>Bos taurus</i>                          | 88  | PROTEIN ENG 10, 575-581 (1997);BIOCHEMISTRY 38, 11961-11972 (1999);BIOPHYS CHEM 83, 3-17 (2000);PROTEIN ENG 6, 953-964 (1993);FEBS LETT 314, 419-424 (19992); |
| 1cea | 67.60        | 7.40 | Plasminogen (kringle 1 domain)                 | 2.10 | <i>Human (homo sapiens)</i>                | 80  | BIOCHEMISTRY 30, 1948-1957 (1991);                                                                                                                            |
| 2hip | 67.70        | 7.00 | High-potential iron sulfur protein (hipi)iso-i | 2.50 | <i>Ectothiorhodospira halophila</i>        | 71  | PROTEIN SCI 4, 2562-2572 (1995);                                                                                                                              |
| 4tln | 68.00        | 7.50 | Thermolysin                                    | 2.30 | <i>Bacillus thermoproteolyticus</i>        | 316 | BIOCHEMISTRY 35, 3477-3486 (1996);                                                                                                                            |
| 1osa | 68.54        | 7.40 | Calmodulin                                     | 1.68 | <i>Paramecium</i>                          | 148 | PROTEINS 50, 381-391 (2003);                                                                                                                                  |
| 1olr | 68.70        | 8.00 | Cel12a                                         | 1.20 | <i>Humicola grisea</i>                     | 223 | PROTEIN SCI 12, 2782-2793 (2003);                                                                                                                             |
| 1znj | 68.70        | 7.40 | Insulin                                        | 2.00 | <i>Human (homo sapiens)</i>                | 30  | BIOCHEMISTRY 44, 11171-11177 (2005);BIOCHEMISTRY 45, 4014-4024 (2006);                                                                                        |
| 1rbp | 68.90        | 7.40 | Serum retinol binding protein                  | 2.00 | <i>Human (homo sapiens)</i>                | 175 | PROTEIN SCI 10, 2301-2316 (2001);                                                                                                                             |
| 1col | 69.00        | 7.00 | Colicin a                                      | 2.4  | <i>Escherichia coli</i>                    | 197 | J BIOL CHEM 268, 1553-1557 (1993);                                                                                                                            |
| 1j3  | 70.00        | 7.00 | Lipase 11                                      | 2.20 | <i>Bacillus stearothermophilus</i>         | 388 | BIOSCI BIOTECHNOL BIOCHEM 64, 280-286 (2000);                                                                                                                 |
| 1uw3 | 70.00        | 7.50 | Prion protein                                  | 2.04 | <i>Ovis aries</i>                          | 106 | BIOCHEMISTRY 41, 11017-11024 (2002);                                                                                                                          |
| 1a70 | 70.00        | 7.00 | Ferredoxin                                     | 1.7  | <i>Spinacia oleracea</i>                   | 97  | BIOCHEMISTRY 42, 1354-1364 (2003);                                                                                                                            |
| 2imm | 70.20        | 7.00 | Immunoglobulin                                 | 2.00 | <i>Mus musculus</i>                        | 114 | BIOCHEMISTRY 30, 6922-6929 (1991);                                                                                                                            |
| 1smd | 70.30        | 7.20 | Alpha-amylase                                  | 1.60 | <i>Human (homo sapiens)</i>                | 495 | BIOCHEMISTRY 38, 4613-4619 (1999);                                                                                                                            |
| 1cec | 70.40        | 7.20 | Cellulase c                                    | 2.15 | <i>Clostridium thermocellum</i>            | 331 | BIOPHYS CHEM 132, 229-241 (2002);                                                                                                                             |
| 1hmk | 70.78 (0.47) | 7.50 | Alpha-lactalbumin                              | 2.00 | <i>Capra hircus</i>                        | 121 | PROTEINS 60, 118-130 (2005);PROTEINS 60, 118-130 (2005);PROTEINS 60, 118-130 (2005);PROTEINS 60, 118-130 (2005);                                              |
| 1pca | 71.00        | 7.50 | Carboxypeptidase a                             | 2.00 | <i>Porcine (sus scrofa)</i>                | 403 | EUR J BIOCHEM 176, 225-230 (1988);                                                                                                                            |
| 1ag6 | 71.00        | 7.00 | Plastocyanin                                   | 1.60 | <i>Spinacia oleracea</i>                   | 99  | BIOCHEMISTRY 42, 10301-10310 (2003);                                                                                                                          |
| 4gr  | 72.00        | 6.80 | Gamma-crystallin                               | 1.47 | <i>Bos taurus</i>                          | 174 | J BIOL CHEM 268, 18119-18127 (1993);                                                                                                                          |
| 1tml | 72.37 (0.17) | 6.80 | Cellulase e2                                   | 1.80 | <i>Thermomonospora fusca</i>               | 286 | BIOCHEMISTRY 38, 2570-2576 (1999);                                                                                                                            |
| 2hpr | 73.00        | 7.00 | Hpr protein                                    | 2.00 | <i>Bacillus subtilis</i>                   | 87  | BIOCHEMISTRY 45, 4084-4092 (2006);                                                                                                                            |
| 1jbk | 73.00        | 7.50 | Cplb                                           | 1.80 | <i>Escherichia coli</i>                    | 189 | PROTEIN SCI 11, 1192-1198 (2002);                                                                                                                             |
| 1zip | 74.50        | 7.20 | Adenylate kinase                               | 1.85 | <i>Bacillus stearothermophilus</i>         | 217 | BIOCHEMISTRY 31, 3038-3043 (1992);                                                                                                                            |
| 4lyz | 74.80        | 7.00 | Lysozyme                                       | 2.00 | <i>Gallus gallus</i>                       | 129 | PROTEINS 40, 49-57 (2000);                                                                                                                                    |
| 1svn | 75.50        | 9.00 | Savinase                                       | 1.40 | <i>Bacillus lentus</i>                     | 269 | PROT ENG 17, 149-156 (2004);                                                                                                                                  |
| 1fvk | 76.77        | 7.00 | Dsba                                           | 1.7  | <i>Escherichia coli</i>                    | 188 | PROTEIN SCI 8, 106-112 (1999);                                                                                                                                |
| 1e9o | 76.90        | 7.00 | Cold shock protein                             | 1.17 | <i>Bacillus caldolyticus</i>               | 66  | NAT STRUCT BIOL 7, 380-383 (2000);J MOL BIOL 319, 541-554 (2002);PROTEIN ENG DES SEL 19, 355-358 (2006) PMID: 16720692;                                       |
| 1aye | 77.00        | 7.00 | Ada2h                                          | 1.80 | <i>Human (homo sapiens)</i>                | 401 | BIOCHEMISTRY 41, 5359-5374 (2002);                                                                                                                            |
| 1poo | 77.60        | 7.00 | Phytase                                        | 2.10 | <i>Bacillus amyloliquefaciens</i>          | 353 | NATURE 7, 147-153 (2000);                                                                                                                                     |
| 1ymb | 78.30        | 7.00 | Myoglobin                                      | 1.90 | <i>Equus caballus</i>                      | 153 | BIOCHEMISTRY 40, 5075-5080 (2001);                                                                                                                            |
| 1ova | 78.40        | 7.00 | Ovalbumin                                      | 1.95 | <i>Gallus gallus</i>                       | 385 | PROTEIN SCI 12, 2693-2703 (2003);                                                                                                                             |
| 1gtg | 79.40        | 5.50 | Kumamolisin                                    | 2.3  | <i>Bacillus novosp. mn-32</i>              | 357 | BIOCHIM BIOPHYS ACTA 1764, 364-371 (2006);                                                                                                                    |
| 1pgx | 79.40        | 5.40 | B2 of protein g                                | 1.50 | <i>Streptococcus</i>                       | 70  | BIOCHEMISTRY 31, 3597 (1992);                                                                                                                                 |
| 1shf | 80.10        | 8.00 | Fyn tyrosine kinase (sh3 domain)               | 1.9  | <i>Human (homo sapiens)</i>                | 59  | BIOCHEMISTRY 37, 16172-16182 (1998);J MOL BIOL 333, 641-655 (2003);                                                                                           |
| 1e65 | 81.00        | 7.03 | Azurin                                         | 1.85 | <i>Pseudomonas aeruginosa</i>              | 128 | J PHYS CHEM 99, 14864-14870 (1995);                                                                                                                           |
| 1hrc | 81.60        | 6.00 | Cytochrome c                                   | 1.90 | <i>Equus caballus</i>                      | 104 | BIOCHIM BIOPHYS ACTA 1646, 49-56 (2003);                                                                                                                      |
| 1hgu | 82.00        | 5.50 | Human growth hormone                           | 2.50 | <i>Human (homo sapiens)</i>                | 187 | PROTEIN SCI 11, 1452-1461 (2002);                                                                                                                             |
| 4mbn | 82.20        | 9.60 | Myoglobin                                      | 2.00 | <i>Physeter catodon</i>                    | 153 | PROTEIN SCI 2, 1099-1105 (1993);                                                                                                                              |
| 1bvc | 82.20        | 9.60 | Myoglobin                                      | 1.5  | <i>Cetacea sperm</i>                       | 153 | PROTEIN SCI 2, 1099-1105 (1993);                                                                                                                              |
| 9pap | 83.00        | 5.60 | Papain                                         | 1.65 | <i>Papaya (carica papaya)</i>              | 212 | INT J BIOL MACROMOL 41, 383-390 (2007);                                                                                                                       |
| 2ocj | 84.80        | 7.00 | Tumor suppressor p53                           | 2.05 | <i>Human (homo sapiens)</i>                | 194 | BIOCHEMISTRY 34, 5309-5316 (1995);                                                                                                                            |
| 1io2 | 85.20        | 9.00 | Ribonuclease hii                               | 2.00 | <i>Thermococcus kodakaraensis</i>          | 213 | BIOCHEMISTRY 45, 12673-12679 (2006);                                                                                                                          |
| 2ovo | 85.20        | 4.51 | Ovomucoid third domain                         | 1.50 | <i>Silver pheasant (lophura nythemera)</i> | 56  | BIOCHEMISTRY 34, 4724-4732 (1995);                                                                                                                            |

|      |              |      |                                    |      |                                       |     |                                                                                                                                                                             |
|------|--------------|------|------------------------------------|------|---------------------------------------|-----|-----------------------------------------------------------------------------------------------------------------------------------------------------------------------------|
| 2trx | 85.46 (1.85) | 7.00 | Thioredoxin                        | 1.68 | <i>Escherichia coli</i>               | 108 | BIOCHEMISTRY 34, 2148-2152 (1995);BIOCHEMISTRY 26, 1406-1411 (1987);BIOCHEMISTRY 31, 4901-4907 (1992);BIOCHEMISTRY 32, 7526-7530 (1993);BIOCHEMISTRY 40 10047-10053 (2001); |
| 1cse | 85.83        | 7.00 | Eglin c                            | 1.2  | <i>Hirudo medicinalis</i>             | 63  | BIOPHYS CHEM 55, 247-252 (1995);                                                                                                                                            |
| 1iv7 | 85.85        | 7.00 | Single chain monellin (scm)        | 1.82 | <i>Dioscoreophyllum cumminisii</i>    | 96  | J BIOL CHEM 276, 19624-19630 (2001);                                                                                                                                        |
| 1bsq | 86.00        | 7.00 | Beta-lactoglobulin type b          | 2.22 | <i>Bos taurus</i>                     | 162 | INT J BIOL MACROMOL 38, 9-17 (2006);                                                                                                                                        |
| 1ppn | 86.20        | 3.90 | Proteinase                         | 1.6  | <i>Carica papaya</i>                  | 212 | EUR J BIOCHEM 214, 129-134 (1993);                                                                                                                                          |
| 1onc | 87.80        | 7.00 | Onconase                           | 1.70 | <i>Rana pipiens</i>                   | 103 | BIOCHEMISTRY 39, 8711-8718 (2000);                                                                                                                                          |
| 1n97 | 88.00        | 7.40 | Cytochrome p450                    | 1.80 | <i>Thermus thermophilus</i>           | 385 | J BIOL CHEM 278, 608-616 (2003);                                                                                                                                            |
| 1pga | 88.00        | 7.20 | Protein g                          | 2.07 | <i>Streptococcus</i>                  | 56  | BIOCHEMISTRY 39, 965-977 (2000);                                                                                                                                            |
| 1i4n | 90.30        | 7.50 | Indole glycerol phosphate synthase | 2.50 | <i>Thermotoga maritima</i>            | 251 | J MOL BIOL 288, 753-763 (1999);                                                                                                                                             |
| 1azp | 90.70        | 7.00 | Sac7d                              | 1.60 | <i>Sulfolobus acidocaldarius</i>      | 66  | BIOCHEMISTRY 43, 2840-2853 (2004);BIOCHEMISTRY 44, 915-925 (2005);                                                                                                          |
| 1f4t | 91.00        | 7.40 | Cytochrome p450                    | 1.93 | <i>Sulfolobus solfataricus</i>        | 367 | J BIOL CHEM 278, 608-616 (2003);                                                                                                                                            |
| 1ubq | 91.00        | 4.00 | Ubiquitin                          | 1.80 | <i>Human (homo sapiens)</i>           | 76  | PROTEINS 18, 246-253 (1994);                                                                                                                                                |
| 1h7m | 93.65 (0.15) | 7.40 | Ribosomal protein l30e             | 1.96 | <i>Thermococcus celer</i>             | 98  | PROTEIN SCI 12, 1483-1495 (2003);J MOL BIOL 348, 419-431 (2005);                                                                                                            |
| 1jji | 99.00        | 7.50 | Esterase                           | 2.20 | <i>Archaeoglobus fulgidus</i>         | 311 | BIOCHEMISTRY 41 1364-1371 (2002);                                                                                                                                           |
| 2bjd | 100.80       | 5.50 | Acylphosphatase                    | 1.27 | <i>Sulfolobus solfataricus</i>        | 90  | PROTEINS 62, 64-79 (2006);                                                                                                                                                  |
| 1tmy | 100.85       | 6.00 | Chey                               | 1.90 | <i>Thermotoga maritima</i>            | 118 | BIOCHEMISTRY 40 13107-13113 (2001);                                                                                                                                         |
| 1bli | 101.00       | 7.40 | Alpha-amylase                      | 1.90 | <i>Bacillus licheniformis</i>         | 481 | BIOCHEMISTRY 43, 9589-9599(2004);                                                                                                                                           |
| 1r0f | 104.00       | 7.50 | Rubredoxin                         | 1.60 | <i>Clostridium pasteurianum</i>       | 53  | PROTEINS 57, 118-127 (2004);                                                                                                                                                |
| 5pti | 104.00       | 7.00 | Trypsin inhibitor                  | 1.00 | <i>Bos taurus</i>                     | 58  | BIOCHEMISTRY 36, 5323-5335 (1997);                                                                                                                                          |
| 2a3m | 108.00       | 7.60 | Cytochrome g20c3                   | 1.50 | <i>Desulfovibrio desulfuricans</i>    | 107 | J MOL BIOL 358, 1-14 (2006);                                                                                                                                                |
| 2d0s | 108.00       | 5.00 | Cytochrome c 552                   | 2.20 | <i>Hydrogenophilus thermoluteolus</i> | 79  | BIOCHEMISTRY 45, 6115-6123 (2006);                                                                                                                                          |
| 451c | 109.00       | 7.00 | Cytochrome c551                    | 1.6  | <i>Pseudomonas aeruginosa</i>         | 82  | J AM CHEM SOC 126, 14684-14685 (2004);                                                                                                                                      |
| 1w2i | 111.50       | 7.40 | Acylphosphatase                    | 1.50 | <i>Pyrococcus horikoshii</i>          | 90  | BIOCHEMISTRY 44, 4601-4611 (2005);                                                                                                                                          |
| 2cth | 121.60       | 7.60 | Cytochrome c3                      | 1.67 | <i>Desulfovibrio vulgaris</i>         | 107 | BIOCHEMISTRY 38, 33-41 (1999);                                                                                                                                              |
| 1brf | 143.80       | 7.00 | Rubredoxin                         | 1.62 | <i>Pyrococcus furiosus</i>            | 53  | PROTEINS 57, 118-127 (2004);                                                                                                                                                |

\* Berman HM, Westbrook J, Feng Z, Gilliland G, Bhat TN, Weissig H, Shindyalov IN, Bourne PE. The Protein Data Bank. Nucleic Acids Res 2000;28:235-242.

† The standard deviation  $\sigma$  of the melting temperature  $T_m$  is computed from different results obtained in experiments performed under the same conditions.

**Table S4 – List of proteins in each refined subset**

| Mesostable protein subset | Reference set | Thermostable protein subset | Mesostable protein subset (continued) | Reference set (continued) | Thermostable protein subset (continued) |
|---------------------------|---------------|-----------------------------|---------------------------------------|---------------------------|-----------------------------------------|
| 1oa3                      | 1ppi          | 1smd                        |                                       |                           |                                         |
| 1h12                      | 1h12          | 1cec                        | 1hml                                  | 2a3m                      | 1uw3                                    |
| 1qwo                      | 1qwo          | 2trx                        | 1avu                                  | 1pgx                      | 1tgn                                    |
| 1bni                      | 1e65          | 1e65                        | 2ci2                                  | 3psg                      | 1znj                                    |
| 2acy                      | 2hip          | 4gcr                        | 1yea                                  | 2cab                      | 1w2i                                    |
| 1ten                      | 2rbi          | 2hip                        | 1chk                                  | 1ew4                      | 1h7m                                    |
| 1lni                      | 4blm          | 2cth                        | 1pii                                  | 1wlg                      | 2ovo                                    |
| 3sil                      | 1azp          | 1shf                        |                                       | 1tmy                      |                                         |
| 1csp                      | 2acy          | 1pga                        |                                       | 1lmb                      |                                         |
| 1mve                      | 1lni          | 4blm                        |                                       | 1pca                      |                                         |
| 1rhg                      | 3sil          | 1azp                        |                                       | 1sup                      |                                         |
| 1aqh                      | 1mjc          | 1tmy                        |                                       | 1hxn                      |                                         |
| 1oxa                      | 1poh          | 1aye                        |                                       | 1fvk                      |                                         |
| 1ey0                      | 1rro          | 1cse                        |                                       | 1gwy                      |                                         |
| 1shg                      | 1io2          | 1hrc                        |                                       | 2d0s                      |                                         |
| 1rtp                      | 1cpm          | 1gwy                        |                                       | 1tca                      |                                         |
| 1qlp                      | 1rhg          | 1fvk                        |                                       | 1rg8                      |                                         |
| 1pmk                      | 4tln          | 2hpr                        |                                       | 1a70                      |                                         |
| 1orc                      | 6taa          | 451c                        |                                       | 1v0s                      |                                         |
| 2rn2                      | 1oxa          | 1io2                        |                                       | 5pti                      |                                         |
| 1ke4                      | 1ey0          | 4tln                        |                                       | 1rx4                      |                                         |
| 1rn1                      | 1tml          | 1a70                        |                                       | 1bu7                      |                                         |
| 2fx5                      | 1wdn          | 5pti                        |                                       | 3mbp                      |                                         |
| 1esf                      | 1shg          | 1ova                        |                                       | 2a01                      |                                         |
| 1bmc                      | 9pap          | 1tml                        |                                       | 1jii                      |                                         |
| 1kfw                      | 1qlp          | 1onc                        |                                       | 1tpk                      |                                         |
| 2nvh                      | 1orc          | 1f4t                        |                                       | 1cyo                      |                                         |
| 1w2p                      | 2rn2          | 3mbp                        |                                       | 1zip                      |                                         |
| 1abe                      | 1ke4          | 1wdn                        |                                       | 1ayf                      |                                         |
| 1e21                      | 1poo          | 1ppn                        |                                       | 1am7                      |                                         |
| 2cpp                      | 1jbk          | 1jii                        |                                       | 1wq5                      |                                         |
| 1d0b                      | 2imm          | 1cea                        |                                       | 1hgu                      |                                         |
| 5pep                      | 1ubq          | 1cyo                        |                                       | 2lzm                      |                                         |
| 2cab                      | 1fna          | 1poo                        |                                       | 3pgk                      |                                         |
| 1ew4                      | 2ocj          | 1hgu                        |                                       | 1rbp                      |                                         |
| 1wlg                      | 9rnt          | 2lzm                        |                                       | 1avr                      |                                         |
| 1blc                      | 1bmc          | 1n97                        |                                       | 1ftg                      |                                         |
| 1hxn                      | 1esf          | 1jbk                        |                                       | 1iv7                      |                                         |
| 1lmb                      | 2fx5          | 1rbp                        |                                       | 1ekg                      |                                         |
| 2fal                      | 1oa4          | 4lyz                        |                                       | 2fal                      |                                         |
| 1tca                      | 1kfw          | 1iv7                        |                                       | 1efc                      |                                         |
| 1fga                      | 2nvh          | 2imm                        |                                       | 1g6n                      |                                         |
| 1poh                      | 1bli          | 1bvc                        |                                       | 1onc                      |                                         |
| 1v0s                      | 1ag6          | 1ubq                        |                                       | 1col                      |                                         |
| 1rx4                      | 1w2p          | 1fna                        |                                       | 1bsq                      |                                         |
| 1bu7                      | 1bk7          | 2ocj                        |                                       | 1ttq                      |                                         |
| 2a01                      | 1ji3          | 1g6n                        |                                       | 1bd8                      |                                         |
| 1p3j                      | 1osa          | 1olr                        |                                       | 1lz1                      |                                         |
| 1wq5                      | 1abe          | 1bli                        |                                       | 1xyp                      |                                         |
| 1am7                      | 1tgn          | 1ag6                        |                                       | 1r0f                      |                                         |
| 1ayf                      | 3rn3          | 1col                        |                                       | 2ci2                      |                                         |
| 3pgk                      | 2bjd          | 1bsq                        |                                       | 1uw3                      |                                         |
| 1avr                      | 1h7m          | 1zip                        |                                       | 1avu                      |                                         |
| 1ftg                      | 2ovo          | 1bk7                        |                                       | 1znj                      |                                         |
| 1efc                      | 1akd          | 1ji3                        |                                       | 1ycc                      |                                         |
| 1ekg                      | 1cec          | 1osa                        |                                       | 1pii                      |                                         |
| 1ttq                      | 2trx          | 1brf                        |                                       | 1chk                      |                                         |
| 1ihb                      | 1d0b          | 1i4n                        |                                       |                           |                                         |
| 1xyp                      | 4gcr          | 1c9o                        |                                       |                           |                                         |

**Table S5 – Amino acid groups**

| Type             | Amino acids |
|------------------|-------------|
| Aliphatic        | AILV        |
| Small            | AG          |
| Charged +        | KR          |
| Charged -        | DE          |
| Aromatic         | FWY         |
| Noncharged polar | NQST        |

Table S6 – Details on all pairs of amino acids and amino acid groups satisfying our statistical significance criteria

| Thermostabilizing interactions ( $C_{\mu}$ - $C_{\mu}$ potentials) |             |                   |                                                    |             |                                                                 |           |           |             |           |           |             |           |           |             |           |           |             |           |           |             |           |           |
|--------------------------------------------------------------------|-------------|-------------------|----------------------------------------------------|-------------|-----------------------------------------------------------------|-----------|-----------|-------------|-----------|-----------|-------------|-----------|-----------|-------------|-----------|-----------|-------------|-----------|-----------|-------------|-----------|-----------|
| Type of interactions                                               | Interaction | Sign <sup>+</sup> | 1 <sup>st</sup> statistical significance criterion |             | 2 <sup>nd</sup> statistical significance criterion <sup>†</sup> |           |           |             |           |           |             |           |           |             |           |           |             |           |           |             |           |           |
|                                                                    |             |                   | $A_{total}$                                        | $P_{total}$ | 1st minimum                                                     |           |           | 2nd minimum |           |           | 3rd minimum |           |           | 4th minimum |           |           | 5th minimum |           |           | 6th minimum |           |           |
|                                                                    |             |                   |                                                    |             | $d$                                                             | $A_{min}$ | $P_{min}$ | $d$         | $A_{min}$ | $P_{min}$ | $d$         | $A_{min}$ | $P_{min}$ | $d$         | $A_{min}$ | $P_{min}$ | $d$         | $A_{min}$ | $P_{min}$ | $d$         | $A_{min}$ | $P_{min}$ |
| Salt bridges                                                       | DE - KR     | -                 | 4.40                                               | 0.70        | 3.95                                                            | 5.77      | 0.60      | 6.35        | 5.77      | 0.60      | 7.45        | 5.77      | 0.60      | /           | /         | /         | /           | /         | /         | /           | /         |           |
|                                                                    | D - KR      | -                 | 3.22                                               | 5.50        | 3.85                                                            | 3.45      | 1.10      | 6.25        | 3.45      | 3.10      | /           | /         | /         | /           | /         | /         | /           | /         | /         | /           | /         |           |
|                                                                    | E - KR      | -                 | 4.67                                               | 1.40        | 4.45                                                            | 4.69      | 1.10      | 6.95        | -0.02     | 98.90     | /           | /         | /         | /           | /         | /         | /           | /         | /         | /           | /         |           |
|                                                                    | DE - R      | -                 | 5.16                                               | 2.40        | 5.75                                                            | 5.97      | 3.40      | 7.15        | 5.97      | 3.10      | 7.45        | 5.97      | 3.10      | /           | /         | /         | /           | /         | /         | /           | /         |           |
|                                                                    | D - R       | -                 | 4.58                                               | 8.60        | 3.95                                                            | 0.15      | 82.30     | 5.35        | 3.26      | 4.60      | 5.95        | -0.00     | 99.90     | 6.15        | 1.52      | 32.90     | /           | /         | /         | /           | /         | /         |
|                                                                    | E - R       | -                 | 5.02                                               | 2.60        | 4.45                                                            | 4.57      | 1.10      | 5.85        | 4.57      | 1.10      | 6.45        | 0.61      | 55.40     | 7.75        | 2.53      | 13.30     | /           | /         | /         | /           | /         | /         |
|                                                                    | E - H       | -                 | -0.07                                              | 96.30       | 5.25                                                            | 0.35      | 71.60     | /           | /         | /         | /           | /         | /         | /           | /         | /         | /           | /         | /         | /           | /         |           |
| Cation- $\pi$ interactions                                         | KR - FWY    | -                 | 4.31                                               | 3.70        | 3.75                                                            | 1.96      | 3.10      | 5.95        | 4.88      | 2.10      | 7.35        | 4.88      | 2.10      | 8.55        | 4.88      | 1.80      | /           | /         | /         | /           | /         |           |
|                                                                    | R - FWY     | -                 | 4.22                                               | 6.40        | 3.65                                                            | N.D.      | N.D.      | 6.05        | 4.82      | 3.00      | /           | /         | /         | /           | /         | /         | /           | /         | /         | /           | /         |           |
|                                                                    | KR - W      | -                 | 3.05                                               | 3.60        | 4.95                                                            | N.D.      | N.D.      | 6.25        | 5.60      | 1.90      | 7.55        | 5.60      | 1.90      | /           | /         | /         | /           | /         | /         | /           | /         |           |
|                                                                    | KR - Y      | -                 | 5.37                                               | 3.60        | 6.25                                                            | 8.12      | 1.20      | 7.25        | 8.12      | 1.20      | /           | /         | /         | /           | /         | /         | /           | /         | /         | /           | /         |           |
|                                                                    | K - F       | +                 | 1.16                                               | 16.00       | 4.35                                                            | N.D.      | N.D.      | /           | /         | /         | /           | /         | /         | /           | /         | /         | /           | /         | /         | /           | /         |           |
|                                                                    | K - Y       | -                 | 3.72                                               | 8.90        | 3.95                                                            | N.D.      | N.D.      | 5.15        | 4.34      | 3.10      | /           | /         | /         | /           | /         | /         | /           | /         | /         | /           | /         | /         |
|                                                                    | R - W       | -                 | 0.60                                               | 1.80        | 6.25                                                            | 0.60      | 7.30      | /           | /         | /         | /           | /         | /         | /           | /         | /         | /           | /         | /         | /           | /         |           |
|                                                                    | R - Y       | -                 | 5.12                                               | 0.50        | 5.95                                                            | 6.86      | 0.80      | 7.35        | 6.86      | 0.70      | /           | /         | /         | /           | /         | /         | /           | /         | /         | /           | /         |           |
|                                                                    |             | H - F             | -                                                  | 0.86        | 2.60                                                            | 5.15      | 1.99      | 0.80        | /         | /         | /           | /         | /         | /           | /         | /         | /           | /         | /         | /           | /         | /         |
| Aromatic interactions                                              | F - FWY     | -                 | 2.76                                               | 8.00        | 5.45                                                            | 2.00      | 7.50      | 6.15        | 2.67      | 12.50     | /           | /         | /         | /           | /         | /         | /           | /         | /         | /           | /         |           |
|                                                                    | F - W       | -                 | 4.17                                               | 1.50        | 6.45                                                            | 4.30      | 2.20      | 7.15        | 4.30      | 1.90      | /           | /         | /         | /           | /         | /         | /           | /         | /         | /           | /         |           |
| Negatively charged Y or W                                          | DE - W      | -                 | 4.26                                               | 4.10        | 4.45                                                            | 7.03      | 0.60      | 5.65        | 7.03      | 1.60      | 6.75        | 7.03      | 2.60      | 7.55        | 7.03      | 2.60      | 8.35        | 7.03      | 2.40      | /           | /         |           |
|                                                                    | DE - Y      | -                 | 4.58                                               | 3.30        | 4.65                                                            | 8.06      | 1.20      | 6.55        | 8.06      | 1.20      | 7.15        | 8.06      | 1.20      | 7.75        | 8.06      | 1.20      | /           | /         | /         | /           | /         |           |
|                                                                    | D - W       | -                 | 0.63                                               | 6.00        | 5.45                                                            | 2.17      | 1.40      | /           | /         | /         | /           | /         | /         | /           | /         | /         | /           | /         | /         | /           | /         | /         |
|                                                                    | D - Y       | -                 | 3.30                                               | 8.50        | 5.45                                                            | 1.80      | 19.10     | 6.75        | 5.49      | 0.70      | 7.45        | 5.49      | 0.80      | 7.65        | 5.49      | 0.80      | 7.85        | 5.49      | 0.80      | 8.05        | 5.49      | 0.80      |
| Small - charged                                                    | AG - KR     | +                 | 3.99                                               | 1.20        | 5.25                                                            | 3.91      | 0.70      | 7.65        | 1.44      | 14.80     | /           | /         | /         | /           | /         | /         | /           | /         | /         | /           | /         |           |
|                                                                    | G - KR      | -                 | 3.72                                               | 3.10        | 4.65                                                            | 2.43      | 4.40      | 7.75        | 2.40      | 5.80      | /           | /         | /         | /           | /         | /         | /           | /         | /         | /           | /         |           |
|                                                                    | AG - R      | -                 | 6.37                                               | 0.40        | 3.65                                                            | 8.65      | 0.60      | 4.75        | 8.65      | 0.70      | 6.65        | 8.65      | 0.70      | /           | /         | /         | /           | /         | /         | /           | /         |           |
|                                                                    | G - H       | -                 | 1.54                                               | 9.10        | 4.55                                                            | N.D.      | N.D.      | 6.55        | 3.34      | 8.10      | 7.35        | 3.34      | 11.30     | /           | /         | /         | /           | /         | /         | /           | /         |           |
|                                                                    | G - R       | -                 | 5.00                                               | 2.80        | 4.95                                                            | 8.20      | 0.50      | 5.55        | 8.20      | 0.50      | 6.35        | 8.20      | 0.50      | 6.95        | 8.20      | 0.50      | 7.75        | 8.20      | 0.50      | /           | /         |           |
|                                                                    | AG - E      | -                 | 3.78                                               | 8.20        | 7.05                                                            | 2.84      | 6.80      | 7.95        | 0.37      | 65.70     | /           | /         | /         | /           | /         | /         | /           | /         | /         | /           | /         | /         |
|                                                                    | A - E       | +                 | 3.33                                               | 0.80        | 6.55                                                            | 5.73      | 0.30      | 7.35        | 5.73      | 0.40      | /           | /         | /         | /           | /         | /         | /           | /         | /         | /           | /         | /         |
| Cysteine - uncharged                                               | C - AILV    | -                 | 5.24                                               | 9.70        | 4.25                                                            | 8.62      | 5.70      | 6.75        | 8.62      | 5.70      | 7.45        | 8.62      | 5.70      | /           | /         | /         | /           | /         | /         | /           | /         |           |
|                                                                    | C - AG      | -                 | 3.56                                               | 15.80       | 7.25                                                            | 5.56      | 18.00     | /           | /         | /         | /           | /         | /         | /           | /         | /         | /           | /         | /         | /           | /         |           |
|                                                                    | C - G       | -                 | 0.71                                               | 2.40        | 5.15                                                            | N.D.      | N.D.      | 6.85        | 2.99      | 6.30      | /           | /         | /         | /           | /         | /         | /           | /         | /         | /           | /         |           |
|                                                                    | C - FWY     | -                 | 6.85                                               | 0.40        | 6.05                                                            | 13.04     | 0.20      | 8.25        | 13.04     | 0.20      | /           | /         | /         | /           | /         | /         | /           | /         | /         | /           | /         |           |
|                                                                    | C - NQST    | -                 | 6.29                                               | 7.80        | 3.85                                                            | N.D.      | N.D.      | 5.05        | 3.04      | 14.40     | 5.75        | 3.29      | 9.60      | 6.85        | 3.29      | 9.70      | /           | /         | /         | /           | /         |           |
| Isoleucine - hydrophobic or small                                  | I - AILV    | -                 | 3.48                                               | 1.00        | 4.25                                                            | 4.81      | 2.10      | 7.65        | 4.81      | 2.10      | /           | /         | /         | /           | /         | /         | /           | /         | /         | /           | /         |           |
|                                                                    | I - I       | -                 | 6.11                                               | 0.20        | 4.95                                                            | 10.17     | 0.10      | 5.65        | 10.17     | 0.10      | 6.55        | 10.17     | 0.10      | 8.45        | 10.17     | 0.10      | /           | /         | /         | /           | /         |           |
|                                                                    | I - AG      | -                 | 3.94                                               | 2.60        | 5.65                                                            | -0.41     | 48.60     | 5.85        | -0.41     | 47.30     | /           | /         | /         | /           | /         | /         | /           | /         | /         | /           | /         |           |
|                                                                    | I - A       | -                 | 5.66                                               | 0.10        | 4.65                                                            | 5.05      | <0.1      | 7.65        | 2.55      | 1.70      | /           | /         | /         | /           | /         | /         | /           | /         | /         | /           | /         |           |
|                                                                    | I - FWY     | -                 | 2.40                                               | 10.90       | 4.25                                                            | -0.17     | 83.70     | /           | /         | /         | /           | /         | /         | /           | /         | /         | /           | /         | /         | /           | /         |           |
|                                                                    | I - W       | -                 | 2.98                                               | 5.60        | 6.75                                                            | 7.00      | 0.70      | /           | /         | /         | /           | /         | /         | /           | /         | /         | /           | /         | /         | /           | /         |           |
|                                                                    | I - Y       | -                 | 4.29                                               | 3.70        | 4.45                                                            | 0.95      | 37.10     | 5.95        | 5.38      | 4.60      | 8.15        | 5.38      | 4.50      | /           | /         | /         | /           | /         | /         | /           | /         |           |
| Methionine - charged, aromatic or small                            | M - KR      | +                 | 1.73                                               | 3.70        | 4.95                                                            | N.D.      | N.D.      | /           | /         | /         | /           | /         | /         | /           | /         | /         | /           | /         | /         | /           | /         |           |
|                                                                    | M - DE      | -                 | 2.04                                               | 2.20        | 6.35                                                            | -0.17     | 50.00     | /           | /         | /         | /           | /         | /         | /           | /         | /         | /           | /         | /         | /           | /         |           |
|                                                                    | M - FWY     | -                 | 3.96                                               | 7.60        | 6.05                                                            | 3.98      | 7.00      | 7.95        | 1.93      | 6.30      | /           | /         | /         | /           | /         | /         | /           | /         | /         | /           | /         |           |
|                                                                    | M - Y       | -                 | 2.02                                               | 6.60        | 6.35                                                            | 2.30      | 2.20      | /           | /         | /         | /           | /         | /         | /           | /         | /         | /           | /         | /         | /           | /         |           |
|                                                                    | M - A       | -                 | 4.67                                               | 1.10        | 5.45                                                            | 3.98      | 1.70      | 6.65        | 3.98      | 1.90      | 7.75        | 3.98      | 2.10      | 8.45        | 0.25      | 70.20     | /           | /         | /         | /           | /         |           |
| Others                                                             | Y - AILV    | -                 | 3.24                                               | 5.70        | 4.25                                                            | -0.01     | 99.40     | /           | /         | /         | /           | /         | /         | /           | /         | /         | /           | /         | /         | /           | /         |           |
|                                                                    | Y - V       | -                 | 3.66                                               | 9.30        | 4.15                                                            | 6.35      | 0.60      | 5.95        | 6.35      | 1.80      | 7.95        | 6.35      | 1.70      | /           | /         | /         | /           | /         | /         | /           | /         |           |
|                                                                    | R - KR      | +                 | 2.42                                               | 6.20        | 5.05                                                            | 0.82      | 11.10     | 5.25        | -0.12     | 64.90     | /           | /         | /         | /           | /         | /         | /           | /         | /         | /           | /         |           |
|                                                                    | E - N       | -                 | 0.80                                               | 59.30       | 4.25                                                            | 0.03      | 70.60     | 5.85        | -0.15     | 86.40     | /           | /         | /         | /           | /         | /         | /           | /         | /         | /           | /         |           |
|                                                                    | R - N       | +                 | 1.89                                               | 2.10        | 5.85                                                            | -0.08     | 81.70     | 6.55        | 4.39      | 1.40      | 7.35        | 4.39      | 1.50      | /           | /         | /         | /           | /         | /         | /           | /         |           |
|                                                                    | V - KR      | +                 | 3.27                                               | 9.40        | 4.85                                                            | -0.08     | 93.70     | 5.75        | 3.69      | 3.60      | /           | /         | /         | /           | /         | /         | /           | /         | /         | /           | /         |           |
|                                                                    | F - P       | -                 | 2.94                                               | 7.90        | 4.05                                                            | N.D.      | N.D.      | 6.35        | 1.77      | 10.40     | 7.45        | 1.77      | 8.80      | /           | /         | /         | /           | /         | /         | /           | /         |           |
|                                                                    | N - P       | +                 | 2.00                                               | 5.00        | 4.45                                                            | N.D.      | N.D.      | 5.85        | 2.94      | 1.40      | /           | /         | /         | /           | /         | /         | /           | /         | /         | /           | /         |           |
|                                                                    | T - Y       | -                 | 3.12                                               | 10.10       | 5.25                                                            | 2.21      | 10.40     | 6.65        | 1.22      | 41.70     | 7.15        | 1.22      | 41.10     | /           | /         | /         | /           | /         | /         | /           | /         |           |

| Thermostabilizing interactions ( $C_v$ - $C_p$ potentials) |             |                   |                                                    |                    |                                                                 |                  |                  |             |                  |                  |             |                  |                  |             |                  |                  |             |                  |                  |             |                  |                  |
|------------------------------------------------------------|-------------|-------------------|----------------------------------------------------|--------------------|-----------------------------------------------------------------|------------------|------------------|-------------|------------------|------------------|-------------|------------------|------------------|-------------|------------------|------------------|-------------|------------------|------------------|-------------|------------------|------------------|
| Type of interactions                                       | Interaction | Sign <sup>+</sup> | 1 <sup>st</sup> statistical significance criterion |                    | 2 <sup>nd</sup> statistical significance criterion <sup>†</sup> |                  |                  |             |                  |                  |             |                  |                  |             |                  |                  |             |                  |                  |             |                  |                  |
|                                                            |             |                   | A <sub>total</sub>                                 | P <sub>total</sub> | 1st minimum                                                     |                  |                  | 2nd minimum |                  |                  | 3rd minimum |                  |                  | 4th minimum |                  |                  | 5th minimum |                  |                  | 6th minimum |                  |                  |
|                                                            |             |                   |                                                    |                    | d                                                               | A <sub>min</sub> | P <sub>min</sub> | d           | A <sub>min</sub> | P <sub>min</sub> | d           | A <sub>min</sub> | P <sub>min</sub> | d           | A <sub>min</sub> | P <sub>min</sub> | d           | A <sub>min</sub> | P <sub>min</sub> | d           | A <sub>min</sub> | P <sub>min</sub> |
| Salt bridges                                               | DE - KR     | +                 | 3.99                                               | 1.70               | 6.65                                                            | 3.99             | 1.20             | 7.65        | 0.91             | 24.20            | /           | /                | /                | /           | /                | /                | /           | /                | /                | /           | /                |                  |
|                                                            | D - KR      | -                 | 3.53                                               | 5.60               | 6.65                                                            | 0.47             | 50.40            | 8.25        | 0.89             | 20.00            | /           | /                | /                | /           | /                | /                | /           | /                | /                | /           | /                |                  |
|                                                            | E - KR      | +                 | 4.66                                               | 6.10               | 5.65                                                            | -0.00            | 99.70            | 6.65        | 3.54             | 8.50             | /           | /                | /                | /           | /                | /                | /           | /                | /                | /           | /                |                  |
|                                                            | DE - R      | -                 | 5.04                                               | 4.60               | 3.85                                                            | 5.07             | 2.40             | 6.55        | 5.07             | 2.40             | 8.35        | 1.08             | 27.00            | /           | /                | /                | /           | /                | /                | /           | /                |                  |
|                                                            | D - R       | -                 | 4.94                                               | 5.50               | 3.85                                                            | 3.21             | 6.30             | 6.45        | 1.73             | 32.30            | 8.25        | 1.12             | 26.20            | /           | /                | /                | /           | /                | /                | /           | /                |                  |
|                                                            | E - R       | -                 | 5.59                                               | 2.50               | 3.95                                                            | 1.51             | 18.60            | 5.65        | 6.33             | 1.70             | 6.65        | 6.33             | 1.80             | 7.45        | 6.33             | 1.90             | 8.35        | 6.33             | 1.60             | 8.55        | 6.33             | 1.60             |
|                                                            | E - H       | -                 | 2.39                                               | 2.70               | 4.15                                                            | 2.39             | 3.70             | /           | /                | /                | /           | /                | /                | /           | /                | /                | /           | /                | /                | /           | /                | /                |
| Cation- $\pi$ interactions                                 | KR - FWY    | -                 | 4.58                                               | 2.80               | 3.85                                                            | 1.42             | 14.90            | 4.75        | 5.34             | 1.30             | 6.05        | 5.34             | 1.60             | 7.75        | 5.34             | 1.60             | /           | /                | /                | /           | /                |                  |
|                                                            | R - FWY     | -                 | 3.83                                               | 8.40               | 3.75                                                            | 0.76             | 34.50            | 4.75        | 3.37             | 4.20             | 6.15        | 3.37             | 5.00             | 6.35        | 3.37             | 4.90             | 7.65        | 1.69             | 16.30            | /           | /                |                  |
|                                                            | KR - W      | -                 | 2.41                                               | 2.90               | 5.75                                                            | -0.09            | 90.30            | /           | /                | /                | /           | /                | /                | /           | /                | /                | /           | /                | /                | /           | /                | /                |
|                                                            | KR - Y      | -                 | 4.77                                               | 3.50               | 4.65                                                            | 7.32             | 1.20             | 6.35        | 7.32             | 1.30             | 7.85        | 7.32             | 1.30             | /           | /                | /                | /           | /                | /                | /           | /                |                  |
|                                                            | K - F       | +                 | 1.89                                               | 0.30               | 6.05                                                            | 2.45             | 0.70             | 6.95        | 2.45             | 0.80             | /           | /                | /                | /           | /                | /                | /           | /                | /                | /           | /                | /                |
|                                                            | K - Y       | -                 | 1.77                                               | 30.90              | 4.65                                                            | 1.16             | 18.90            | 6.25        | -0.13            | 94.00            | 7.05        | 3.48             | 8.40             | /           | /                | /                | /           | /                | /                | /           | /                | /                |
|                                                            | R - W       | -                 | <0.1                                               | 9.30               | /                                                               | /                | /                | /           | /                | /                | /           | /                | /                | /           | /                | /                | /           | /                | /                | /           | /                | /                |
|                                                            | R - Y       | -                 | 4.35                                               | 1.50               | 4.65                                                            | 6.60             | 0.30             | 5.85        | 6.60             | 0.70             | 6.35        | 6.60             | 0.70             | 7.75        | 6.60             | 0.70             | /           | /                | /                | /           | /                | /                |
|                                                            | H - F       | -                 | 0.74                                               | 15.00              | 5.35                                                            | 1.33             | 11.50            | /           | /                | /                | /           | /                | /                | /           | /                | /                | /           | /                | /                | /           | /                | /                |
| Aromatic interactions                                      | F - FWY     | -                 | 2.59                                               | 8.20               | 5.85                                                            | 2.96             | 9.40             | /           | /                | /                | /           | /                | /                | /           | /                | /                | /           | /                | /                | /           | /                |                  |
|                                                            | F - W       | -                 | 4.37                                               | 2.30               | 6.15                                                            | 4.41             | 4.20             | 6.85        | 4.41             | 4.00             | 8.35        | 0.53             | 57.20            | /           | /                | /                | /           | /                | /                | /           | /                |                  |
| Negatively charged - Y or W                                | DE - W      | -                 | 4.09                                               | 1.20               | 5.35                                                            | -0.07            | 96.30            | 5.75        | 4.02             | 0.50             | 6.65        | 4.02             | 0.70             | /           | /                | /                | /           | /                | /                | /           | /                |                  |
|                                                            | DE - Y      | -                 | 3.17                                               | 6.10               | 5.35                                                            | 1.80             | 10.90            | 6.65        | 4.72             | 1.00             | 7.55        | 4.72             | 1.10             | /           | /                | /                | /           | /                | /                | /           | /                |                  |
|                                                            | D - W       | -                 | 0.63                                               | 26.50              | 5.35                                                            | 2.42             | 4.80             | 6.65        | 2.42             | 4.50             | 7.35        | N.D.             | N.D.             | /           | /                | /                | /           | /                | /                | /           | /                |                  |
|                                                            | D - Y       | -                 | 2.26                                               | 22.80              | 5.25                                                            | 1.82             | 25.30            | 6.75        | 4.41             | 3.60             | 7.65        | 4.41             | 4.40             | /           | /                | /                | /           | /                | /                | /           | /                |                  |
| Small - charged                                            | AG - KR     | -                 | 3.72                                               | 1.40               | 3.75                                                            | 3.86             | 0.20             | 5.45        | 3.86             | 0.30             | 7.05        | -0.00            | 99.80            | /           | /                | /                | /           | /                | /                | /           | /                |                  |
|                                                            | G - KR      | +                 | 4.84                                               | 1.10               | 3.85                                                            | 5.29             | <0.1             | 5.45        | 5.29             | <0.1             | 7.35        | 1.29             | 20.20            | 8.35        | 1.29             | 16.60            | /           | /                | /                | /           | /                |                  |
|                                                            | AG - R      | -                 | 4.82                                               | 4.00               | 3.65                                                            | 5.13             | 0.60             | 6.05        | -0.45            | 50.10            | 6.95        | 1.46             | 24.70            | /           | /                | /                | /           | /                | /                | /           | /                |                  |
|                                                            | G - H       | -                 | 1.41                                               | 5.80               | 5.95                                                            | 1.41             | 6.10             | 7.35        | 1.61             | 25.70            | /           | /                | /                | /           | /                | /                | /           | /                | /                | /           | /                |                  |
|                                                            | G - R       | -                 | 4.69                                               | 5.70               | 3.75                                                            | N.D.             | N.D.             | 5.85        | 5.82             | 0.40             | 6.95        | 2.12             | 12.00            | /           | /                | /                | /           | /                | /                | /           | /                |                  |
|                                                            | AG - E      | -                 | 2.67                                               | 17.00              | 3.85                                                            | 3.05             | 1.70             | 5.35        | -0.16            | 83.30            | 6.65        | 2.43             | 4.80             | 7.45        | 2.43             | 6.50             | /           | /                | /                | /           | /                |                  |
|                                                            | A - E       | +                 | 1.21                                               | 30.10              | 4.25                                                            | N.D.             | N.D.             | /           | /                | /                | /           | /                | /                | /           | /                | /                | /           | /                | /                | /           | /                |                  |
| Cysteine - uncharged                                       | C - AILV    | -                 | 4.84                                               | 11.70              | 4.15                                                            | 0.14             | 87.40            | 7.05        | 4.86             | 7.20             | 7.55        | 1.26             | 44.30            | /           | /                | /                | /           | /                | /                | /           | /                |                  |
|                                                            | C - AG      | -                 | 3.32                                               | 7.80               | 5.05                                                            | N.D.             | N.D.             | 6.15        | 6.41             | 8.50             | 7.25        | 6.41             | 9.10             | /           | /                | /                | /           | /                | /                | /           | /                |                  |
|                                                            | C - G       | -                 | 1.31                                               | 5.60               | 6.15                                                            | 5.89             | 2.40             | 7.25        | 5.89             | 2.60             | 7.45        | 5.89             | 2.40             | 7.65        | 5.89             | 2.60             | /           | /                | /                | /           | /                |                  |
|                                                            | C - FWY     | -                 | 6.59                                               | 0.80               | 4.35                                                            | N.D.             | N.D.             | 5.15        | 12.03            | 0.40             | 6.65        | 12.03            | 0.40             | /           | /                | /                | /           | /                | /                | /           | /                |                  |
|                                                            | C - NQST    | -                 | 4.15                                               | 12.10              | 5.15                                                            | 3.59             | 6.30             | 6.55        | -0.48            | 58.30            | /           | /                | /                | /           | /                | /                | /           | /                | /                | /           | /                |                  |
| Isoleucine - hydrophobic or small                          | I - AILV    | -                 | 3.64                                               | 0.80               | 4.25                                                            | 3.64             | 0.90             | 7.55        | 1.09             | 18.20            | /           | /                | /                | /           | /                | /                | /           | /                | /                | /           | /                |                  |
|                                                            | I - I       | -                 | 6.12                                               | 0.20               | 4.95                                                            | 10.15            | 0.10             | 5.15        | 10.15            | 0.10             | 5.65        | 10.15            | 0.10             | 6.55        | 10.15            | 0.10             | 8.45        | 10.15            | 0.10             | /           | /                |                  |
|                                                            | I - AG      | -                 | 4.04                                               | 1.90               | 4.25                                                            | 4.33             | 0.60             | 7.25        | 1.88             | 6.10             | 8.05        | 1.88             | 6.10             | /           | /                | /                | /           | /                | /                | /           | /                |                  |
|                                                            | I - A       | -                 | 5.57                                               | 0.10               | 4.65                                                            | 4.96             | <0.1             | 7.65        | 2.51             | 1.80             | /           | /                | /                | /           | /                | /                | /           | /                | /                | /           | /                |                  |
|                                                            | I - FWY     | -                 | 2.89                                               | 4.10               | 4.35                                                            | 0.55             | 45.00            | 5.95        | 4.11             | 1.20             | 6.55        | 4.11             | 1.20             | 8.15        | 4.11             | 1.20             | /           | /                | /                | /           | /                |                  |
|                                                            | I - W       | -                 | 3.28                                               | 4.20               | 4.85                                                            | N.D.             | N.D.             | /           | /                | /                | /           | /                | /                | /           | /                | /                | /           | /                | /                | /           | /                |                  |
|                                                            | I - Y       | -                 | 4.27                                               | 3.80               | 4.45                                                            | 0.92             | 39.00            | 5.95        | 5.37             | 4.30             | /           | /                | /                | /           | /                | /                | /           | /                | /                | /           | /                |                  |
| Methionine - charged, aromatic or small                    | M - KR      | +                 | 1.05                                               | 1.20               | 6.25                                                            | N.D.             | N.D.             | 6.85        | 2.53             | 4.00             | /           | /                | /                | /           | /                | /                | /           | /                | /                | /           | /                |                  |
|                                                            | M - DE      | +                 | 1.46                                               | 3.50               | 4.65                                                            | 3.23             | 1.60             | 6.55        | 3.23             | <0.1             | 8.55        | 3.23             | 4.90             | /           | /                | /                | /           | /                | /                | /           | /                |                  |
|                                                            | M - FWY     | -                 | 4.28                                               | 6.30               | 4.35                                                            | 3.45             | 5.10             | 6.45        | 1.11             | 32.40            | /           | /                | /                | /           | /                | /                | /           | /                | /                | /           | /                |                  |
|                                                            | M - Y       | -                 | 2.08                                               | 6.10               | 6.25                                                            | 2.21             | 2.60             | /           | /                | /                | /           | /                | /                | /           | /                | /                | /           | /                | /                | /           | /                |                  |
|                                                            | M - A       | -                 | 4.68                                               | 1.20               | 4.15                                                            | N.D.             | N.D.             | 5.45        | 4.09             | 1.30             | 6.65        | 4.09             | 1.60             | 7.75        | 4.09             | 1.70             | /           | /                | /                | /           | /                |                  |
| Others                                                     | Y - AILV    | -                 | 3.51                                               | 3.50               | 4.35                                                            | -0.01            | 98.90            | /           | /                | /                | /           | /                | /                | /           | /                | /                | /           | /                | /                | /           | /                |                  |
|                                                            | Y - V       | -                 | 3.53                                               | 10.10              | 4.25                                                            | 6.12             | 0.90             | 5.95        | 6.12             | 2.10             | 7.25        | 6.12             | 2.10             | 7.95        | 6.12             | 1.90             | /           | /                | /                | /           | /                |                  |
|                                                            | R - KR      | +                 | 2.09                                               | 15.20              | /                                                               | /                | /                | /           | /                | /                | /           | /                | /                | /           | /                | /                | /           | /                | /                | /           | /                |                  |
|                                                            | E - N       | -                 | 2.87                                               | 4.10               | 3.95                                                            | N.D.             | N.D.             | 4.15        | 0.68             | 6.00             | /           | /                | /                | /           | /                | /                | /           | /                | /                | /           | /                |                  |
|                                                            | R - N       | +                 | 0.16                                               | 75.80              | 4.65                                                            | N.D.             | N.D.             | 5.75        | 2.52             | 3.40             | 7.45        | 2.52             | 10.40            | /           | /                | /                | /           | /                | /                | /           | /                |                  |
|                                                            | V - KR      | +                 | 1.12                                               | 58.90              | 4.15                                                            | N.D.             | N.D.             | 5.05        | 1.40             | 28.30            | /           | /                | /                | /           | /                | /                | /           | /                | /                | /           | /                |                  |
|                                                            | F - P       | -                 | 3.79                                               | 3.10               | 4.15                                                            | N.D.             | N.D.             | 5.65        | 4.46             | 3.00             | 6.35        | 4.46             | 3.00             | /           | /                | /                | /           | /                | /                | /           | /                |                  |
|                                                            | N - P       | +                 | 0.94                                               | 26.50              | 4.95                                                            | N.D.             | N.D.             | 5.75        | 1.17             | 19.70            | /           | /                | /                | /           | /                | /                | /           | /                | /                | /           | /                |                  |
|                                                            | T - Y       | -                 | 3.35                                               | 3.90               | 4.85                                                            | 3.35             | 3.20             | /           | /                | /                | /           | /                | /                | /           | /                | /                | /           | /                | /                | /           | /                |                  |

| Mesostabilizing interactions ( $C_{\mu}$ - $C_{\mu}$ potentials) |             |       |                                                    |             |                                                     |           |           |             |           |           |             |           |           |             |           |           |
|------------------------------------------------------------------|-------------|-------|----------------------------------------------------|-------------|-----------------------------------------------------|-----------|-----------|-------------|-----------|-----------|-------------|-----------|-----------|-------------|-----------|-----------|
| Types of Interactions                                            | Interaction | Sign* | 1 <sup>st</sup> statistical significance criterion |             | 2nd statistical significance criterion <sup>†</sup> |           |           |             |           |           |             |           |           |             |           |           |
|                                                                  |             |       | $A_{total}$                                        | $P_{total}$ | 1st minimum                                         |           |           | 2nd minimum |           |           | 3rd minimum |           |           | 4th minimum |           |           |
|                                                                  |             |       |                                                    |             | $d$                                                 | $A_{min}$ | $P_{min}$ | $d$         | $A_{min}$ | $P_{min}$ | $d$         | $A_{min}$ | $P_{min}$ | $d$         | $A_{min}$ | $P_{min}$ |
| Aliphatic or small - noncharged polar                            | AILV - NQST | -     | -3.16                                              | 1.00        | 4.35                                                | -4.38     | 0.50      | 7.15        | -4.38     | 0.50      |             | /         |           |             | /         |           |
|                                                                  | AG - NQST   | -     | -5.26                                              | 0.30        | 3.65                                                | -7.75     | 0.10      | 7.35        | -7.75     | 0.10      |             | /         |           |             | /         |           |
|                                                                  | A - NQST    | -     | -4.81                                              | 1.60        | 3.75                                                | -6.60     | 1.40      | 7.05        | -6.60     | 1.40      | 7.75        | -6.60     | 1.40      |             | /         |           |
|                                                                  | G - NQST    | -     | -5.31                                              | 0.80        | 3.75                                                | -8.72     | 0.10      | 6.85        | -8.72     | 0.10      |             | /         |           |             | /         |           |
|                                                                  | L - NQST    | -     | -4.59                                              | 0.30        | 4.25                                                | -6.24     | 0.40      | 5.85        | -6.24     | 0.40      | 7.35        | -6.24     | 0.40      | 7.65        | -6.24     | 0.40      |
|                                                                  | AILV - N    | -     | -3.83                                              | 3.20        | 4.15                                                | -3.91     | 2.70      | 7.45        | -0.82     | 31.00     |             | /         |           |             | /         |           |
|                                                                  | AILV - Q    | -     | -3.49                                              | 7.80        | 4.15                                                | -1.94     | 3.40      | 7.65        | -3.21     | 8.50      |             | /         |           |             | /         |           |
|                                                                  | AG - S      | -     | -5.11                                              | 4.80        | 3.65                                                | -6.55     | 3.30      | 7.15        | -6.55     | 4.00      | 7.85        | -6.55     | 3.90      |             | /         |           |
|                                                                  | AILV - T    | -     | -3.17                                              | 3.50        | 4.25                                                | -4.18     | 3.20      | 7.35        | -4.18     | 3.30      | /           | /         | /         |             | /         |           |
|                                                                  | AG - T      | -     | -7.42                                              | 0.10        | 3.75                                                | -3.05     | 0.90      | 6.95        | -7.91     | <0.1      | 7.65        | -7.91     | <0.1      |             | /         |           |
| A - T                                                            | -           | -6.00 | 1.50                                               | 4.05        | -8.30                                               | 0.30      | 7.25      | -8.30       | 0.50      | 8.25      | -8.30       | 0.50      |           | /           |           |           |
| G - S                                                            | -           | -6.07 | 2.60                                               | 6.75        | -8.75                                               | 1.40      | 7.35      | -8.75       | 1.40      | 8.25      | -8.75       | 1.10      |           | /           |           |           |
| G - T                                                            | -           | -4.42 | 5.40                                               | 4.65        | -2.38                                               | 12.60     | 5.95      | 0.48        | 74.10     |           | /           |           |           | /           |           |           |
| Noncharged polar - noncharged polar                              | NQST - NQST | -     | -6.62                                              | 0.10        | 7.05                                                | -9.60     | 0.10      |             | /         |           | /           |           |           | /           |           |           |
|                                                                  | N - NQST    | -     | -8.12                                              | <0.1        | 3.85                                                | 0.26      | 46.30     | 5.75        | -11.90    | <0.1      |             | /         |           |             | /         |           |
|                                                                  | Q - NQST    | -     | -10.11                                             | <0.1        | 4.05                                                | -14.23    | <0.1      | 7.45        | -14.23    | <0.1      |             | /         |           |             | /         |           |
|                                                                  | S - NQST    | -     | -5.53                                              | 4.80        | 7.45                                                | -7.83     | 2.70      |             | /         |           | /           |           |           | /           |           |           |
|                                                                  | T - NQST    | -     | -3.89                                              | 6.30        | 3.75                                                | 0.92      | 17.90     |             | /         |           | /           |           |           | /           |           |           |
| S - N                                                            | -           | -4.09 | 14.90                                              | 3.95        | N.D.                                                | N.D.      | 5.65      | -7.25       | 2.50      |           | /           |           |           | /           |           |           |
| Negatively charged - noncharged polar                            | DE - NQST   | -     | -2.90                                              | 4.50        | 3.65                                                | -4.18     | 0.90      |             | /         |           | /           |           |           | /           |           |           |
|                                                                  | D - NQST    | -     | -5.79                                              | 0.20        | 3.55                                                | -6.39     | 0.30      | 7.35        | -6.39     | 0.40      | 7.55        | -6.39     | 0.40      |             | /         |           |
|                                                                  | DE - T      | +     | -5.92                                              | 1.00        | 5.45                                                | -7.15     | 0.50      | 6.95        | -7.15     | 0.50      | 7.95        | -7.15     | 0.50      |             | /         |           |
| Small - small                                                    | G - AG      | -     | -5.68                                              | 2.10        | 3.65                                                | -5.79     | 1.60      | 7.35        | -1.14     | 35.20     |             | /         |           |             | /         |           |
|                                                                  | A - G       | -     | -5.21                                              | 5.10        | 5.15                                                | -5.65     | 1.40      |             | /         |           | /           |           |           | /           |           |           |
| Leucine - other                                                  | L - FWY     | -     | -2.47                                              | 12.50       | 4.35                                                | -3.06     | 4.30      | 6.15        | -3.06     | 4.70      |             | /         |           |             | /         |           |
|                                                                  | L - F       | -     | -4.27                                              | 5.90        | 4.45                                                | -4.76     | 7.90      | 6.15        | -4.76     | 8.10      |             | /         |           |             | /         |           |
|                                                                  | L - D       | +     | -3.49                                              | 8.60        | 4.85                                                | -3.81     | 5.70      | 6.25        | -3.81     | 6.30      |             | /         |           |             | /         |           |
|                                                                  | L - G       | -     | -4.30                                              | 1.90        | 5.15                                                | -3.10     | 1.80      | 6.55        | -3.62     | 1.90      | 7.75        | -3.62     | 1.90      |             | /         |           |
| Negatively charged - F                                           | DE - F      | +     | -3.52                                              | 9.30        | 5.15                                                | -3.96     | 1.50      |             | /         |           | /           |           |           | /           |           |           |
|                                                                  | E - F       | +     | -1.61                                              | 24.60       | 5.45                                                | -1.61     | 28.00     |             | /         |           | /           |           |           | /           |           |           |

| Mesostabilizing interactions ( $C_v - C_v$ potentials) |             |       |                                                    |             |                                                     |           |           |             |           |           |             |           |           |             |           |           |
|--------------------------------------------------------|-------------|-------|----------------------------------------------------|-------------|-----------------------------------------------------|-----------|-----------|-------------|-----------|-----------|-------------|-----------|-----------|-------------|-----------|-----------|
| Types of Interactions                                  | Interaction | Sign* | 1 <sup>st</sup> statistical significance criterion |             | 2nd statistical significance criterion <sup>†</sup> |           |           |             |           |           |             |           |           |             |           |           |
|                                                        |             |       | $A_{total}$                                        | $P_{total}$ | 1st minimum                                         |           |           | 2nd minimum |           |           | 3rd minimum |           |           | 4th minimum |           |           |
|                                                        |             |       |                                                    |             | $d$                                                 | $A_{min}$ | $P_{min}$ | $d$         | $A_{min}$ | $P_{min}$ | $d$         | $A_{min}$ | $P_{min}$ | $d$         | $A_{min}$ | $P_{min}$ |
| Aliphatic or small - noncharged polar                  | AILV - NQST | -     | -4.32                                              | <0.1        | 4.15                                                | -5.72     | 0.20      | 7.55        | -5.72     | 0.20      |             | /         |           |             | /         |           |
|                                                        | AG - NQST   | -     | -5.53                                              | 0.20        | 3.35                                                | -1.20     | 0.50      | 7.25        | -7.19     | <0.1      |             | /         |           |             | /         |           |
|                                                        | A - NQST    | -     | -5.40                                              | 1.70        | 3.55                                                | -7.95     | 0.80      | 5.65        | -7.95     | 0.80      | 7.75        | -7.95     | 0.80      | 8.05        | -7.95     | 0.80      |
|                                                        | G - NQST    | -     | -5.31                                              | 1.30        | 7.05                                                | -7.66     | 0.50      |             | /         |           |             | /         |           |             | /         |           |
|                                                        | L - NQST    | -     | -4.24                                              | 1.20        | 4.45                                                | -6.06     | 0.50      | 5.55        | -6.06     | 0.50      | 7.85        | -6.06     | 0.50      |             | /         |           |
|                                                        | AILV - N    | -     | -3.57                                              | 5.90        | 4.15                                                | -4.39     | 4.00      | 7.65        | -4.39     | 4.60      |             | /         |           |             | /         |           |
|                                                        | AILV - Q    | -     | -4.19                                              | 5.10        | 4.15                                                | -4.07     | 1.90      | 7.65        | -3.93     | 0.10      |             | /         |           |             | /         |           |
|                                                        | AG - S      | -     | -5.18                                              | 5.80        | 7.55                                                | -7.08     | 1.90      |             | /         |           |             | /         |           |             | /         |           |
|                                                        | AILV - T    | -     | -3.05                                              | 7.50        | 3.95                                                | -3.07     | 5.60      | 6.95        | -3.07     | 5.00      |             | /         |           |             | /         |           |
|                                                        | AG - T      | -     | -7.24                                              | 0.40        | 5.15                                                | -9.98     | <0.1      | 7.05        | -9.98     | <0.1      | 7.85        | -9.98     | <0.1      |             | /         |           |
|                                                        | A - T       | -     | -5.96                                              | 1.20        | 4.75                                                | N.D.      | N.D.      | 5.55        | -8.41     | 0.30      | 6.35        | -8.41     | 0.30      | 7.35        | -8.41     | 0.30      |
| G - S                                                  | -           | -4.51 | 13.50                                              | 5.35        | -8.10                                               | 1.10      | 6.85      | -8.10       | 1.10      | 7.75      | -8.10       | 1.10      |           | /           |           |           |
| G - T                                                  | -           | -3.75 | 9.40                                               | 5.35        | 0.20                                                | 86.10     | 7.15      | -8.19       | <0.1      |           | /           |           |           | /           |           |           |
| Noncharged polar - noncharged polar                    | NQST - NQST | +     | -7.12                                              | 0.10        | 7.45                                                | -10.08    | 0.10      |             | /         |           | /           |           |           | /           |           |           |
|                                                        | N - NQST    | -     | -7.09                                              | 0.80        | 3.35                                                | 0.43      | 61.20     | 5.35        | -11.57    | <0.1      | 5.95        | -11.57    | <0.1      |             | /         |           |
|                                                        | Q - NQST    | -     | -9.71                                              | <0.1        | 3.35                                                | N.D.      | N.D.      | 5.65        | -8.27     | <0.1      | 6.75        | -8.27     | <0.1      |             | /         |           |
|                                                        | S - NQST    | -     | -7.24                                              | 1.20        | 7.45                                                | -9.83     | 0.60      |             | /         |           |             | /         |           |             | /         |           |
|                                                        | T - NQST    | -     | -3.52                                              | 20.60       | 5.25                                                | -6.08     | 1.50      | 7.05        | -6.08     | 1.50      | 8.15        | -6.08     | 1.50      |             | /         |           |
|                                                        | S - N       | -     | -4.96                                              | 5.90        | 3.45                                                | N.D.      | N.D.      | 5.75        | -6.36     | 2.60      |             | /         |           |             | /         |           |
| Negatively charged - noncharged polar                  | DE - NQST   | +     | -2.97                                              | 5.30        | 6.55                                                | 0.03      | 93.40     |             | /         |           | /           |           |           | /           |           |           |
|                                                        | D - NQST    | +     | -6.31                                              | 0.20        | 5.75                                                | -4.61     | 2.60      | 6.55        | -4.61     | 2.60      | 7.55        | -4.61     | 2.50      |             | /         |           |
|                                                        | DE - T      | +     | -4.59                                              | 3.20        | 5.15                                                | -3.51     | 2.80      | 6.05        | -3.51     | 4.10      | 6.95        | -3.51     | 3.50      | 7.75        | -1.06     | 24.30     |
| Small - small                                          | G - AG      | -     | -5.75                                              | 2.30        | 3.75                                                | -5.88     | 1.60      | 7.35        | -1.17     | 34.30     |             | /         |           |             | /         |           |
|                                                        | A - G       | -     | -5.39                                              | 4.50        | 3.85                                                | -5.76     | 1.10      | 5.15        | -5.76     | 1.10      |             | /         |           |             | /         |           |
| Leucine - other                                        | L - FWY     | -     | -3.16                                              | 4.50        | 4.55                                                | -1.82     | 3.70      | 6.05        | -1.34     | 17.50     |             | /         |           |             | /         |           |
|                                                        | L - F       | -     | -3.59                                              | 10.80       | 4.55                                                | -4.27     | 11.50     | 5.95        | -4.27     | 11.80     | 8.55        | -0.47     | 39.60     |             | /         |           |
|                                                        | L - D       | +     | -3.07                                              | 12.60       | 4.85                                                | -1.71     | 21.00     | 6.55        | -1.40     | 30.10     | 8.45        | -0.86     | 30.90     |             | /         |           |
|                                                        | L - G       | -     | -4.31                                              | 1.90        | 5.15                                                | -3.12     | 1.80      | 6.55        | -3.64     | 1.80      | 7.75        | -3.64     | 1.80      |             | /         |           |
| Negatively charged - F                                 | DE - F      | +     | -2.60                                              | 16.00       | 5.75                                                | -3.53     | 0.80      |             | /         |           |             | /         |           |             | /         |           |
|                                                        | E - F       | +     | -2.26                                              | 9.20        | 4.55                                                | N.D.      | N.D.      |             | /         |           |             | /         |           |             | /         |           |

\* The sign is negative (positive) if the interaction is attractive (repulsive) at the global minimum of the potential derived from the reference set.

† The symbol '/' means that no supplementary minima is detected on the potential derived from our reference set. The symbol 'N.D.' means that the minimum detected on the potential derived from our reference set was not detected in one of the two subsets of different thermostability.



**Table S7 – Details on linear correlations between folding free energies  $\Delta W$  and melting temperatures  $T_m$  in eight protein families**

| Protein family                     | PDB code*                       | Sequence identity (%) <sup>†</sup> | $T_m$ (°C)   | $\Delta W_{ref}$ (kcal/mol) | $\Delta W_{thermo} - \Delta W_{meso}$ (kcal/mol) |
|------------------------------------|---------------------------------|------------------------------------|--------------|-----------------------------|--------------------------------------------------|
| <b>Acyclo-phosphatase</b>          | 2acy                            | 100                                | 53.80        | -8.93                       | 0.68                                             |
|                                    | 2bjd                            | 20                                 | 100.80       | -13.94                      | -4.28                                            |
|                                    | 1w2i                            | 29                                 | 111.50       | -13.30                      | -3.66                                            |
|                                    | $r(T_m, \Delta W)$ <sup>‡</sup> |                                    |              | <b>-0.96</b>                | <b>-0.96</b>                                     |
| <b>Adenylate kinase</b>            | 1p3j                            | 100                                | 43.30        | -28.84                      | -0.76                                            |
|                                    | 1s3g                            | 67                                 | 47.60        | -34.76                      | 0.21                                             |
|                                    | 1aky                            | 42                                 | 47.70        | -25.69                      | -2.01                                            |
|                                    | 1ank                            | 48                                 | 51.80        | -34.44                      | -5.65                                            |
|                                    | 1zip                            | 74                                 | 74.50        | -35.12                      | -6.45                                            |
| $r(T_m, \Delta W)$ <sup>‡</sup>    |                                 |                                    | <b>-0.54</b> | <b>-0.78</b>                |                                                  |
| <b><math>\alpha</math>-amylase</b> | 1aqh                            | 100                                | 44.00        | -60.67                      | -3.70                                            |
|                                    | 1ppi                            | 46                                 | 65.60        | -75.38                      | -16.23                                           |
|                                    | 1jae                            | 41                                 | 65.90        | -78.79                      | -14.36                                           |
|                                    | 1smd                            | 44                                 | 70.30        | -77.22                      | -22.95                                           |
| $r(T_m, \Delta W)$ <sup>‡</sup>    |                                 |                                    | <b>-0.97</b> | <b>-0.95</b>                |                                                  |
| <b>Endoglucanase 12</b>            | 1oa3                            | 100                                | 49.20        | -24.69                      | 7.98                                             |
|                                    | 1h8v                            | 93                                 | 54.50        | -20.21                      | 3.04                                             |
|                                    | 1oa4                            | 31                                 | 66.80        | -36.45                      | -0.20                                            |
|                                    | 1olr                            | 47                                 | 68.70        | -22.29                      | -11.01                                           |
| $r(T_m, \Delta W)$ <sup>‡</sup>    |                                 |                                    | <b>-0.41</b> | <b>-0.88</b>                |                                                  |
| <b>Cold shock protein</b>          | 1csp                            | 100                                | 53.80        | -8.49                       | 0.26                                             |
|                                    | 1mjc                            | 59                                 | 56.70        | -8.05                       | -0.17                                            |
|                                    | 1c9o                            | 83                                 | 76.90        | -6.62                       | -1.30                                            |
| $r(T_m, \Delta W)$ <sup>‡</sup>    |                                 |                                    | <b>+0.99</b> | <b>-0.99</b>                |                                                  |
| <b>Cytochrome P450</b>             | 1bu7                            | 100                                | 47.00        | -72.00                      | 6.95                                             |
|                                    | 1oxa                            | 13                                 | 55.00        | -75.66                      | 9.51                                             |
|                                    | 1akd                            | 10                                 | 61.00        | -80.91                      | -4.96                                            |
|                                    | 1n97                            | 20                                 | 88.00        | -75.08                      | -3.22                                            |
|                                    | 1f4t                            | 17                                 | 91.00        | -67.37                      | -9.06                                            |
| $r(T_m, \Delta W)$ <sup>‡</sup>    |                                 |                                    | <b>+0.40</b> | <b>-0.80</b>                |                                                  |
| <b>Lysozyme</b>                    | 1am7                            | 100                                | 52.30        | -15.23                      | 0.80                                             |
|                                    | 2lzm                            | 16                                 | 64.85        | -28.52                      | -1.39                                            |
|                                    | 1lz1                            | 20                                 | 64.90        | -41.01                      | -2.73                                            |
|                                    | 4lyz                            | 2                                  | 74.80        | -28.80                      | -4.51                                            |
| $r(T_m, \Delta W)$ <sup>‡</sup>    |                                 |                                    | <b>-0.58</b> | <b>-0.97</b>                |                                                  |
| <b>Myoglobin</b>                   | 2fal                            | 100                                | 52.00        | -34.13                      | 0.37                                             |
|                                    | 1ymb                            | 21                                 | 78.30        | -17.72                      | -3.12                                            |
|                                    | 1bvc                            | 21                                 | 82.20        | -19.87                      | -7.85                                            |
| $r(T_m, \Delta W)$ <sup>‡</sup>    |                                 |                                    | <b>+0.97</b> | <b>-0.88</b>                |                                                  |

\* Berman HM, Westbrook J, Feng Z, Gilliland G, Bhat TN, Weissig H, Shindyalov IN, Bourne PE. The Protein Data Bank. Nucleic Acids Res 2000;28:235-242.

<sup>†</sup> Sequence identities computed with respect to the first protein of the family.

<sup>‡</sup> Linear correlation coefficient computed between the melting temperatures  $T_m$  and either  $\Delta W_{ref}$  or  $\Delta W_{thermo} - \Delta W_{meso}$ .

**Figure S1 – Illustration of the two statistical criteria used to identify the differences between the potentials derived from the two protein subsets, in the case of the D-R interaction**

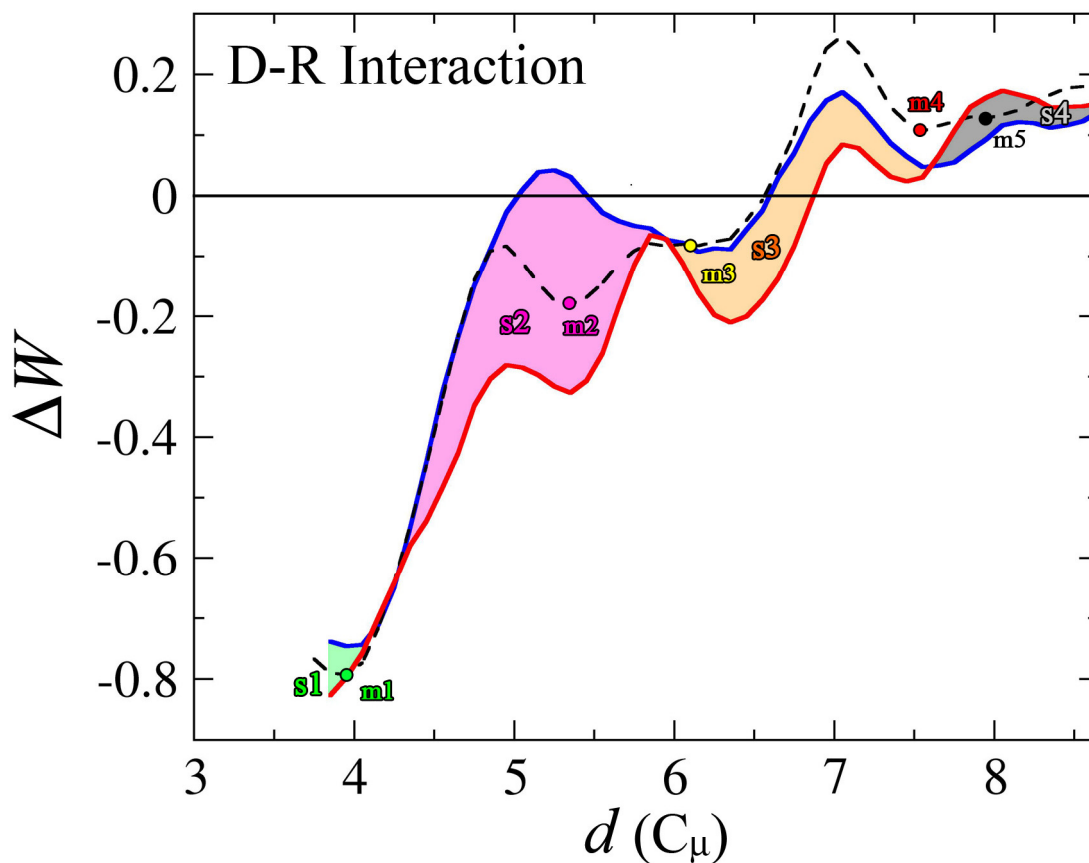

**Figure S1 – Illustration of the two statistical criteria used to identify the differences between the potentials derived from the two protein subsets, in the case of the D-R interaction.** The first criterion is related to the surface area  $s1+s2+s3-s4$  between the curves representing the potentials derived from the thermoresistant (red line) and mesoresistant (blue line) protein subsets; a negative sign is given when the former curve is above the latter. The second criterion is related to the surface areas (in different colors) between the curves, around each minimum ( $m1$ - $m5$ , colored circles). The minima are defined on the basis of the potential derived from the reference protein set (dashed line). In this example,  $m3$  and  $m4$  share the same surface area. Plots designed with XmGrace<sup>(38)</sup>.

## Figures S2-S56 - Thermostabilizing interaction potentials

Folding free energy contribution  $\Delta W$  (kcal/mol) as a function of the distance  $d$  between side chain descriptors for the thermoresistant protein subset (red), the mesoresistant one (blue), and the reference set (dashed line). Left plots are based on  $C_\mu$  descriptors and right plots on the  $C_v$  descriptors.

S2)

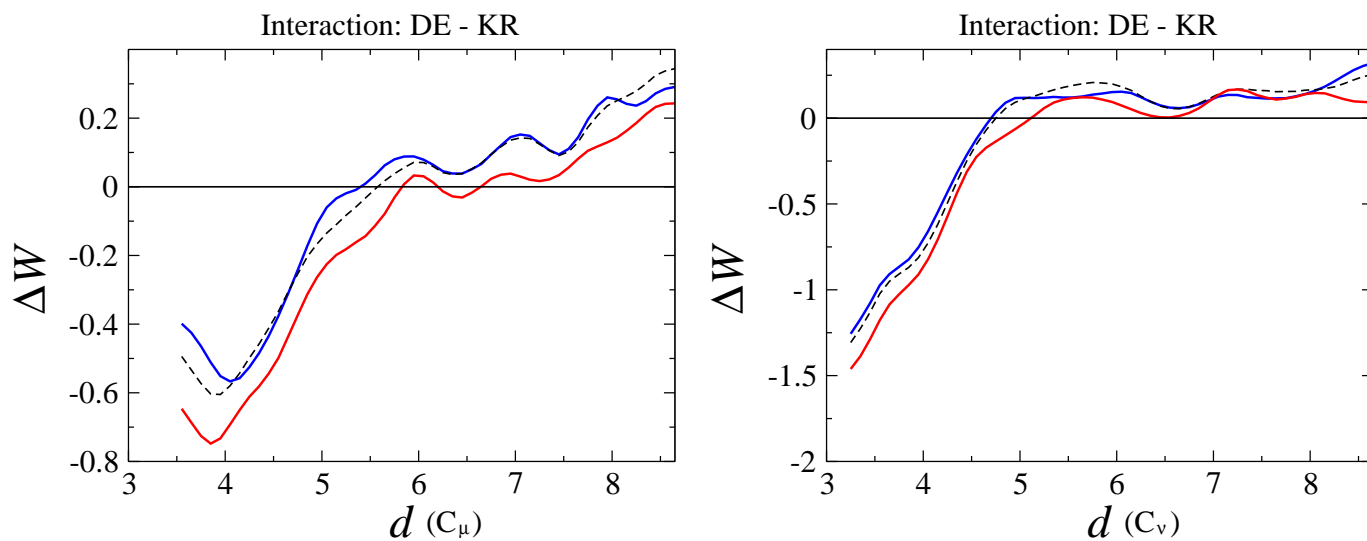

S3)

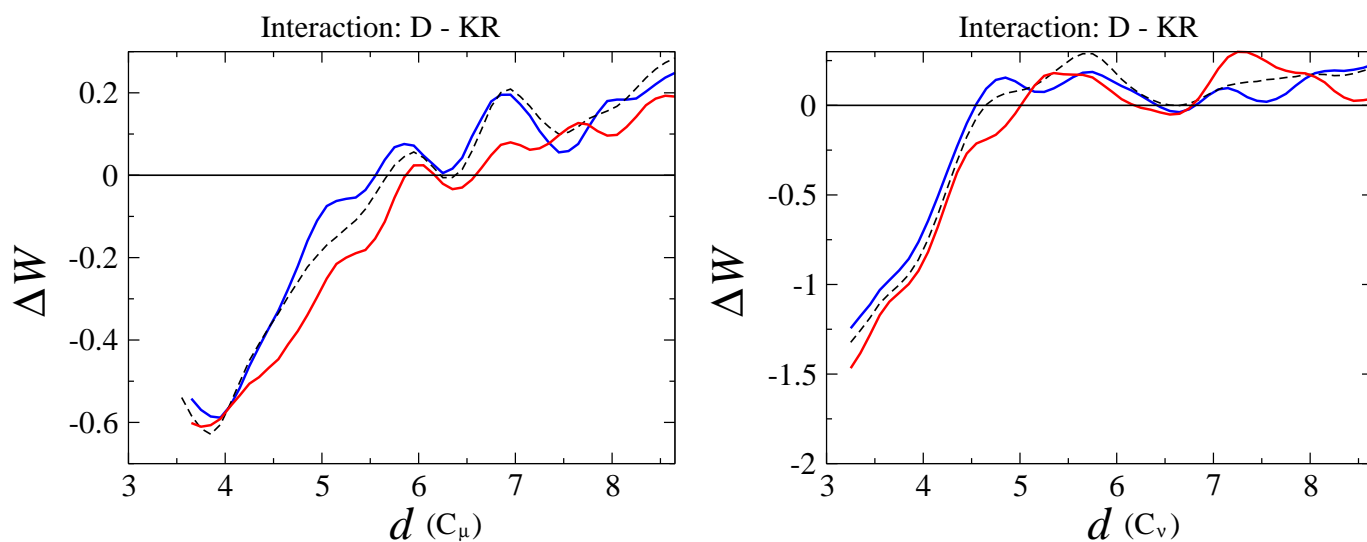

S4)

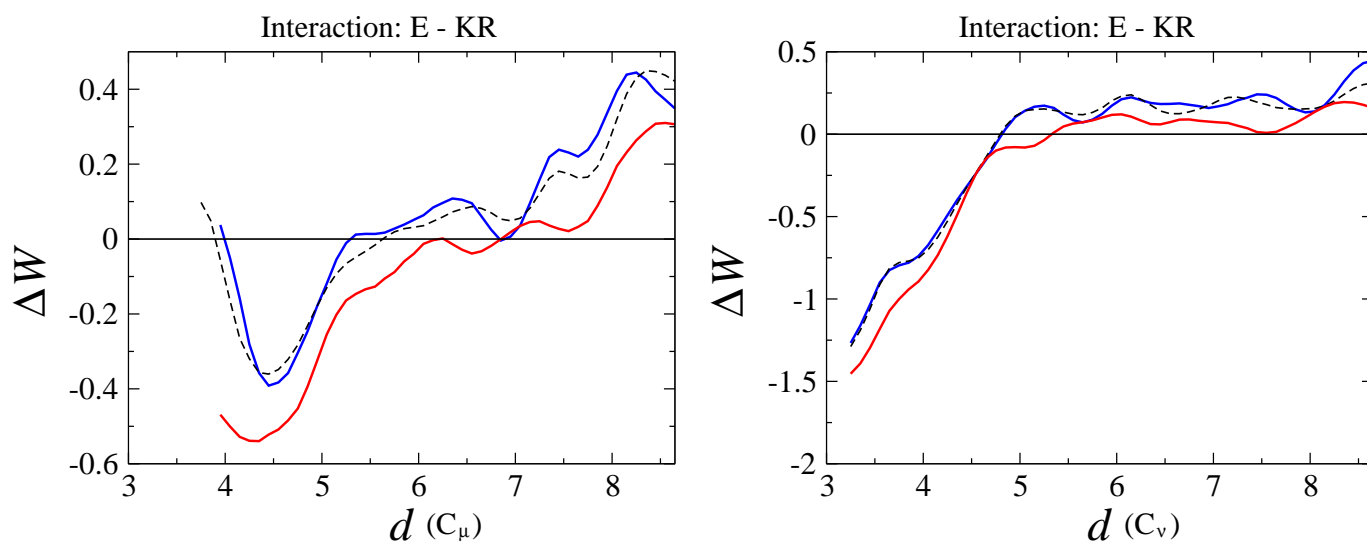

S5)

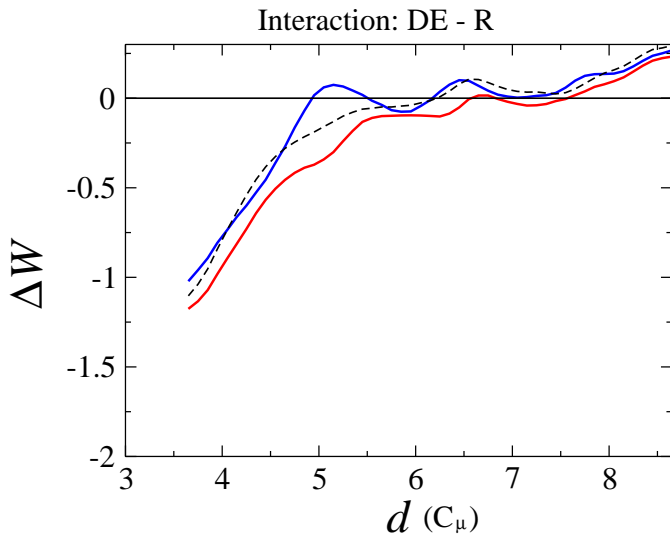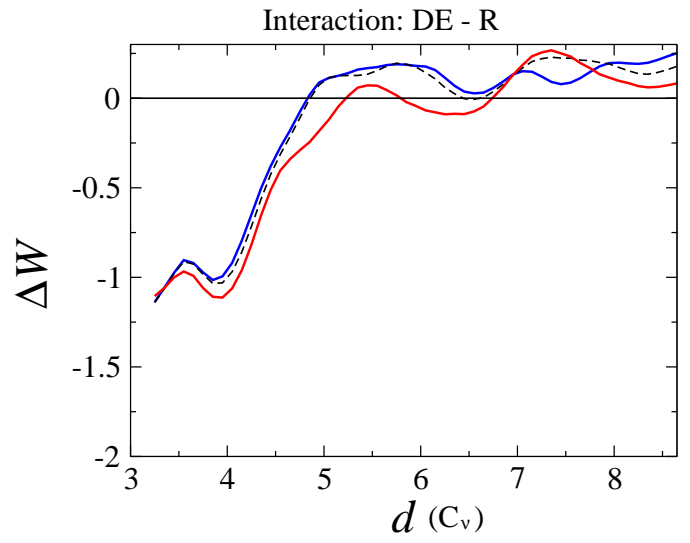

S6)

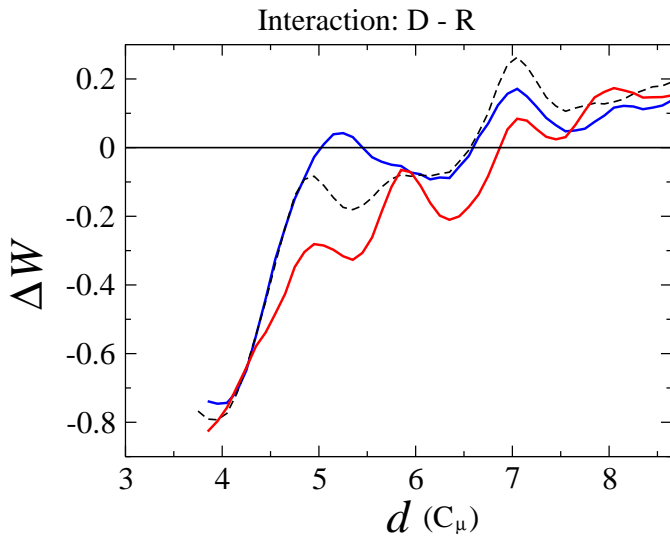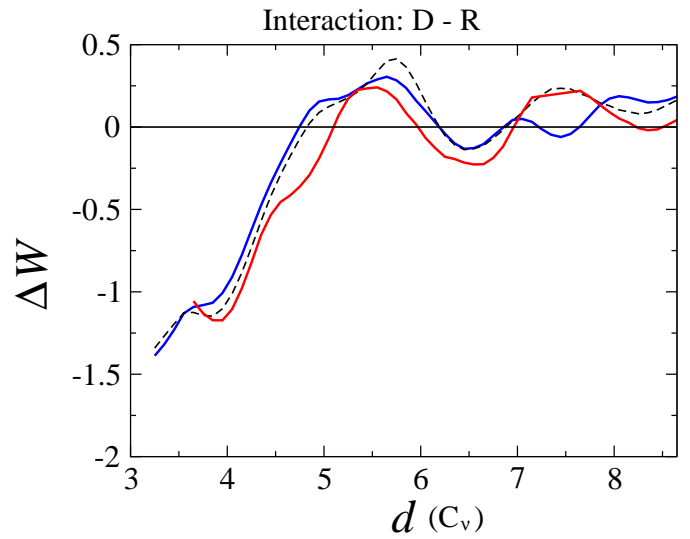

S7)

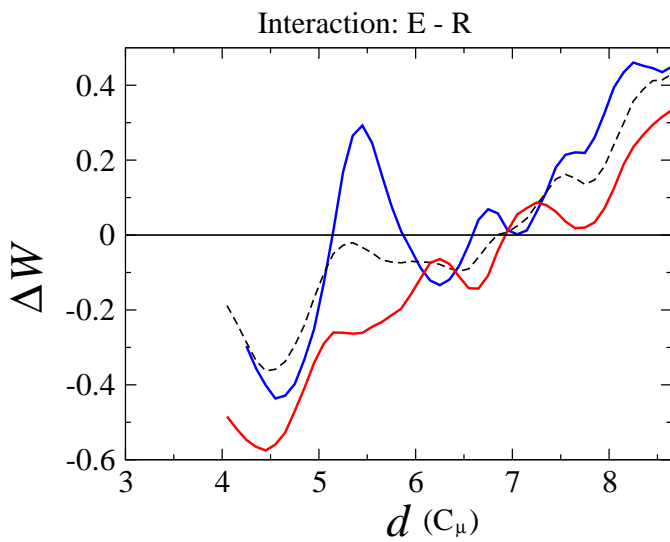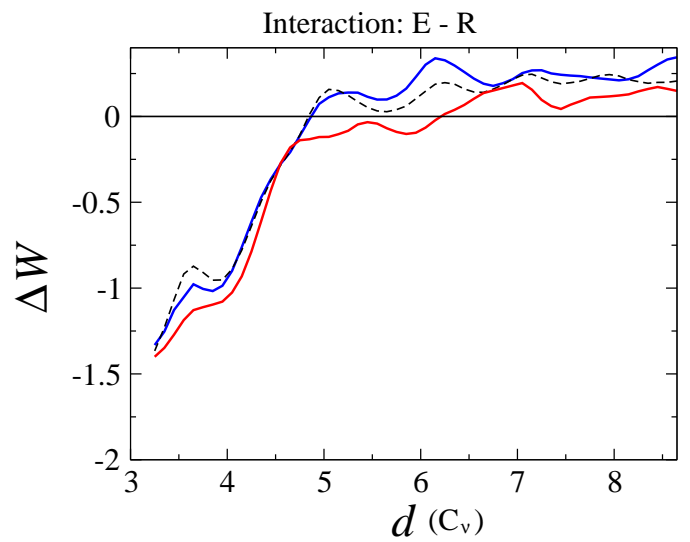

S8)

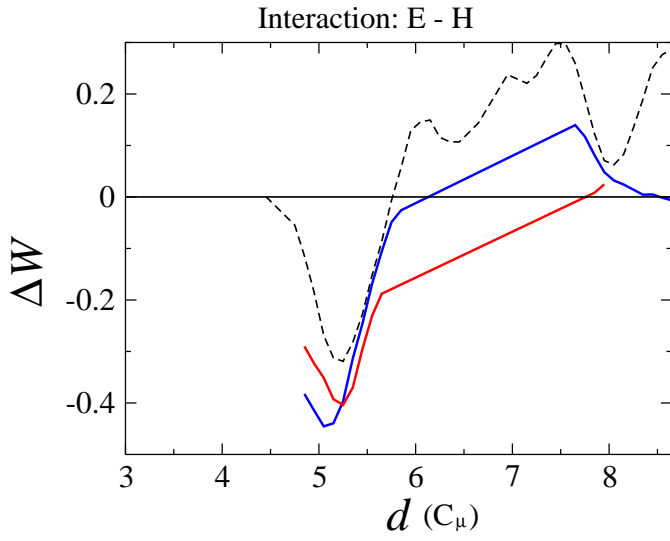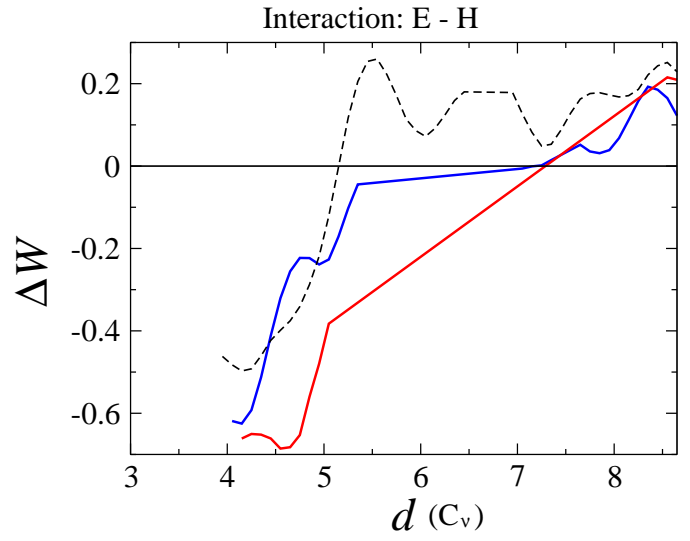

S9)

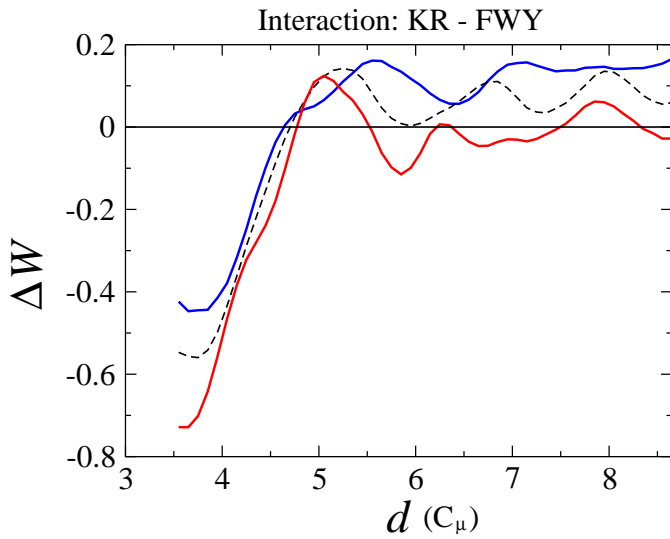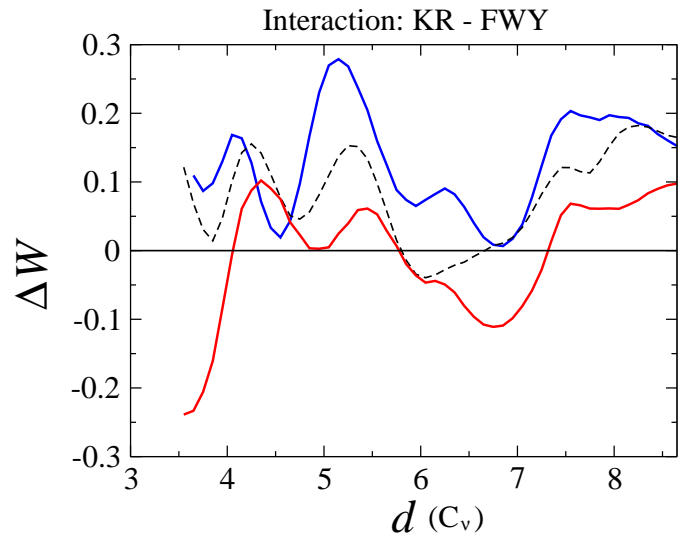

S10)

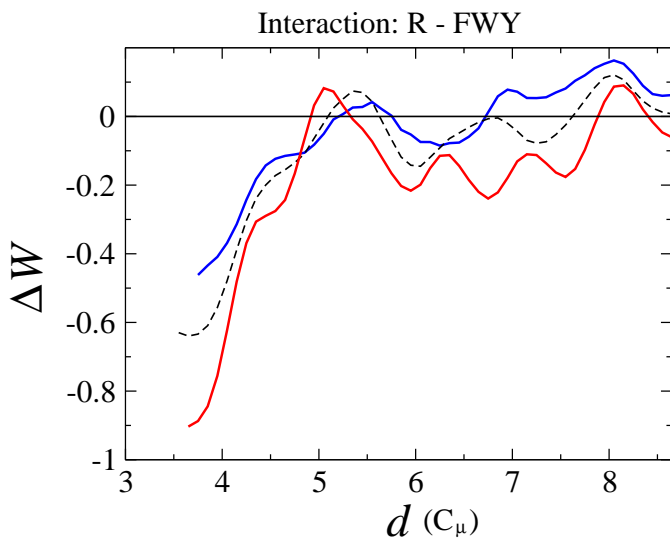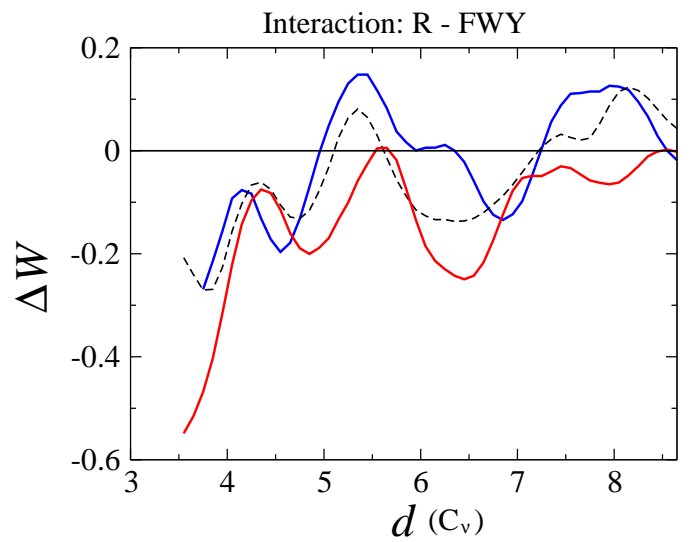

S11)

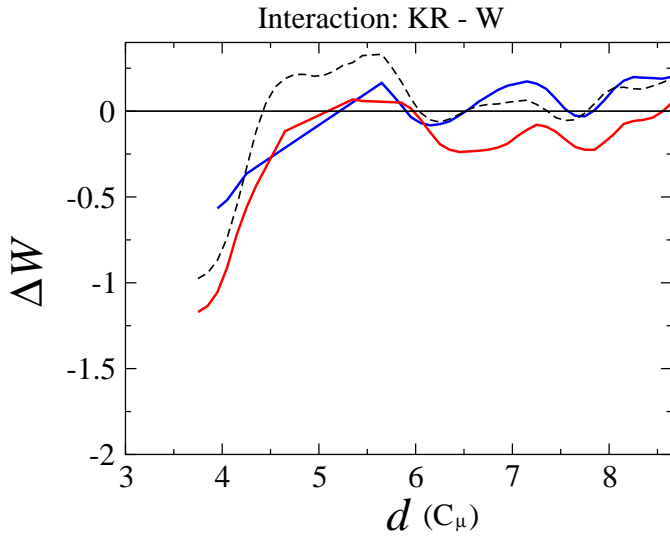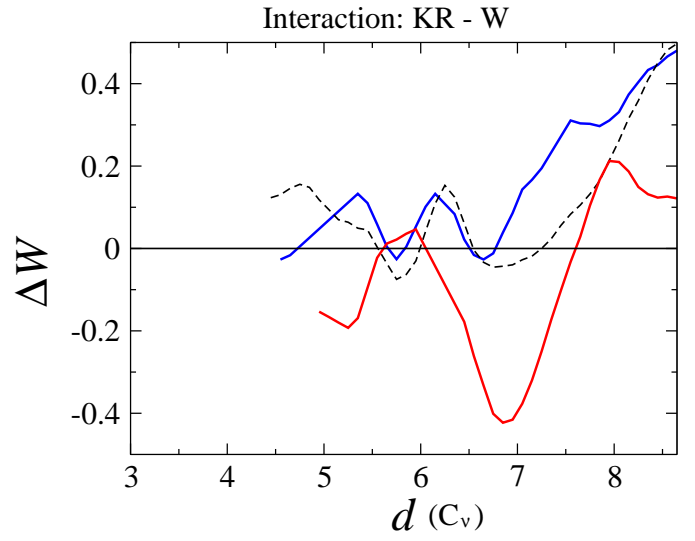

S12)

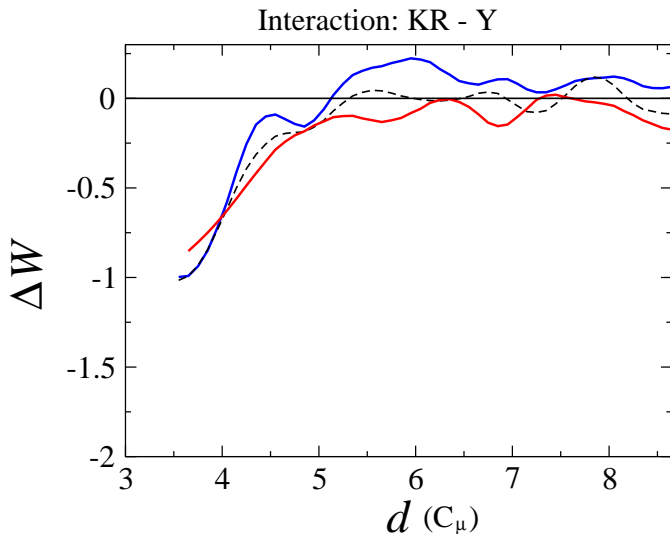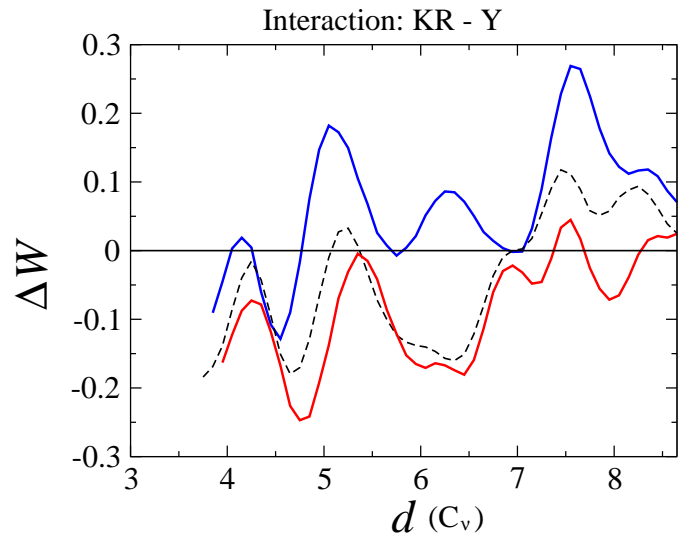

S13)

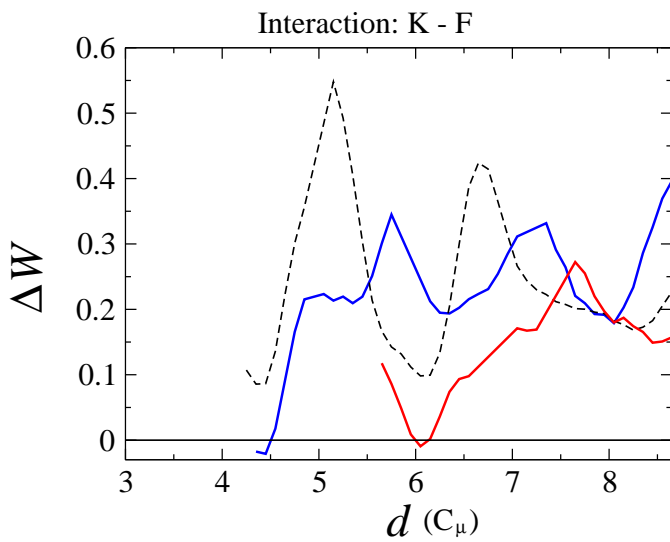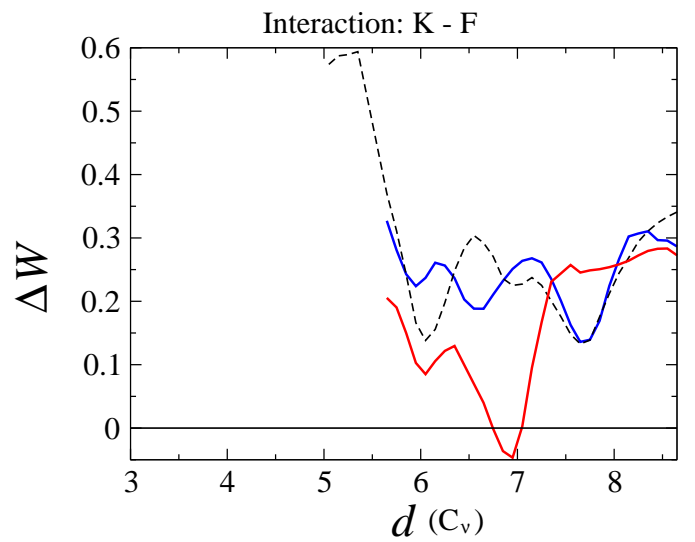

S14)

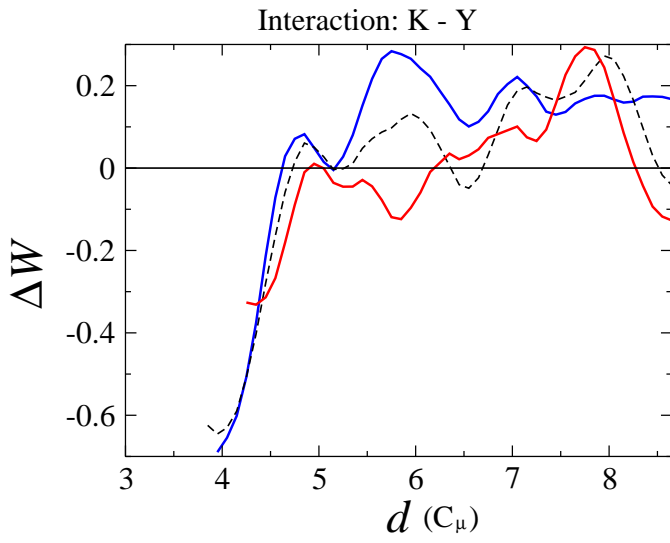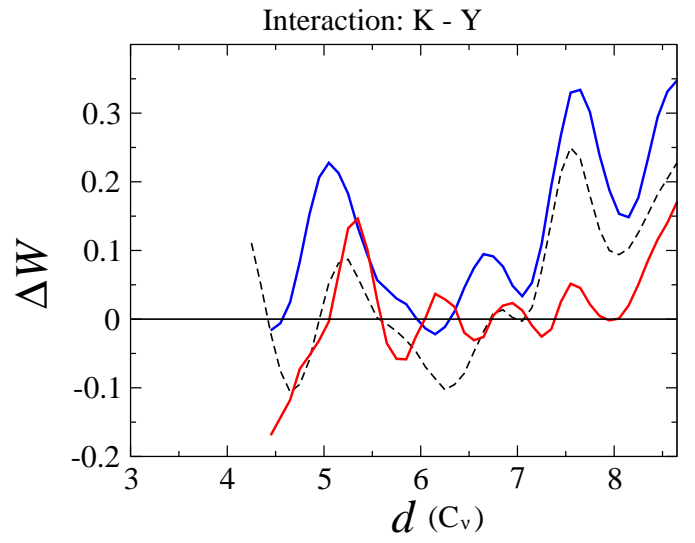

S15)

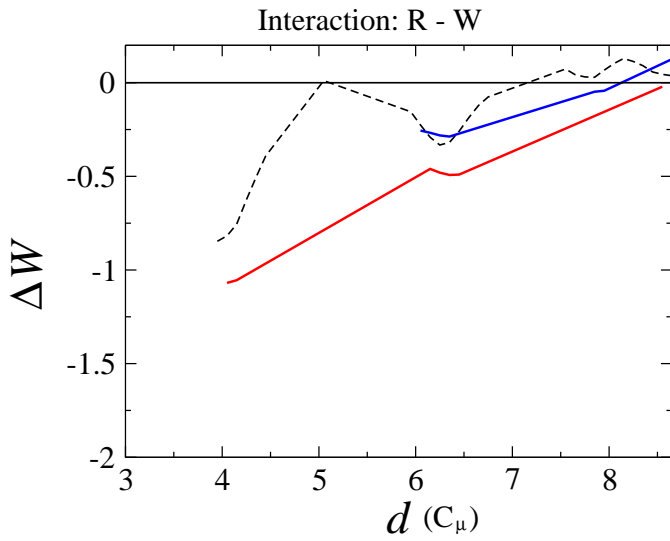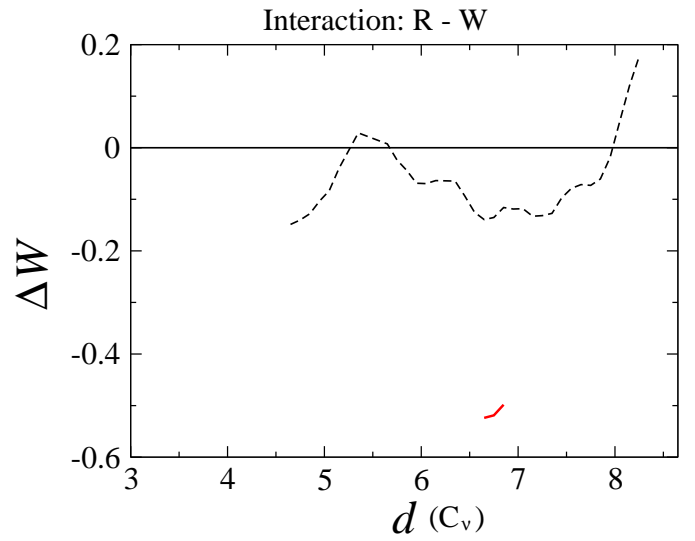

S16)

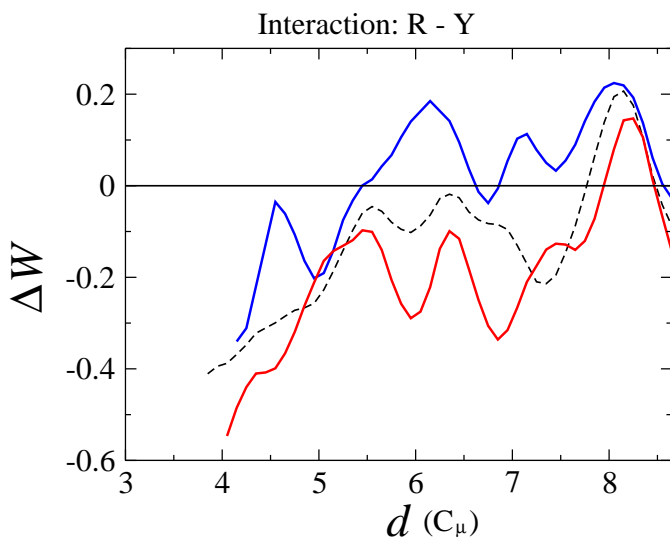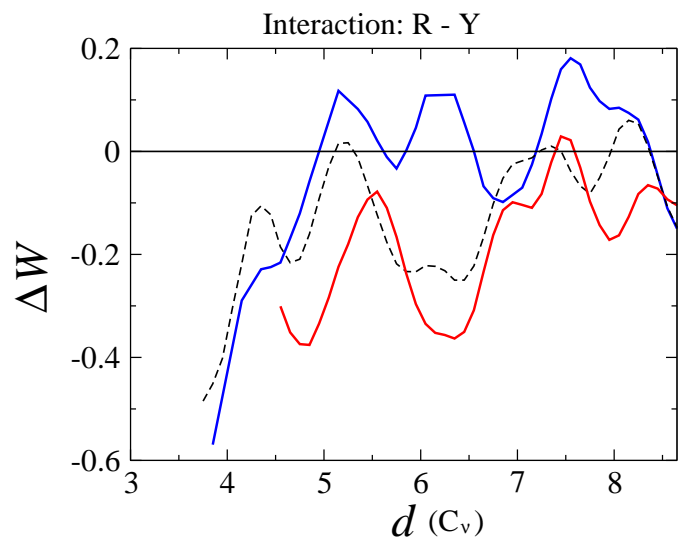

S17)

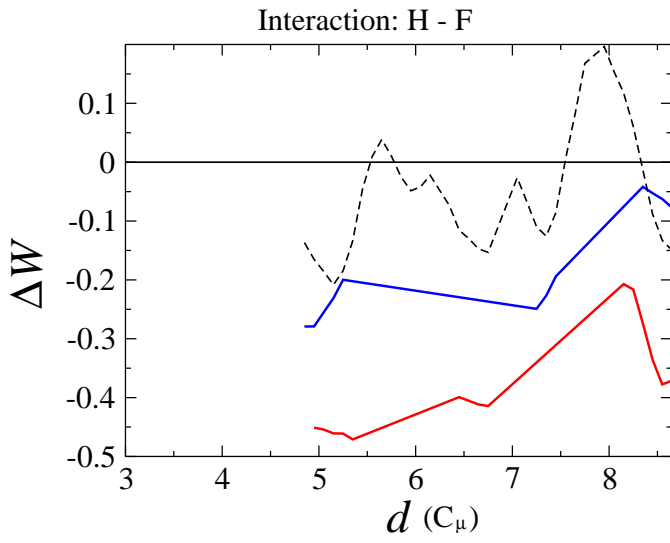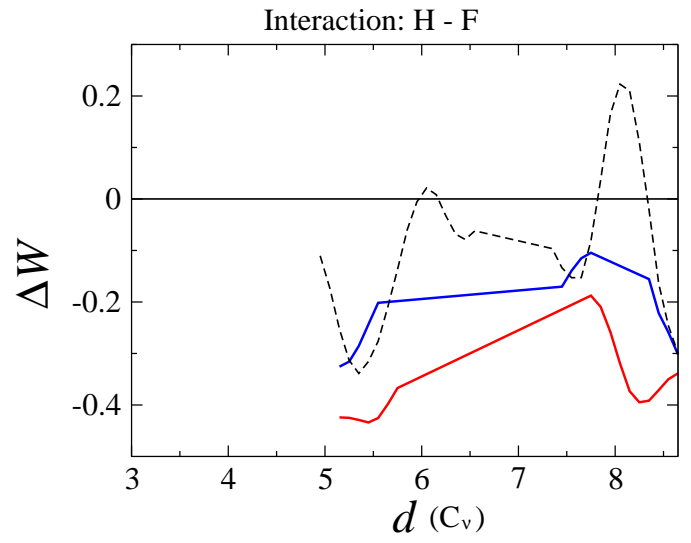

S18)

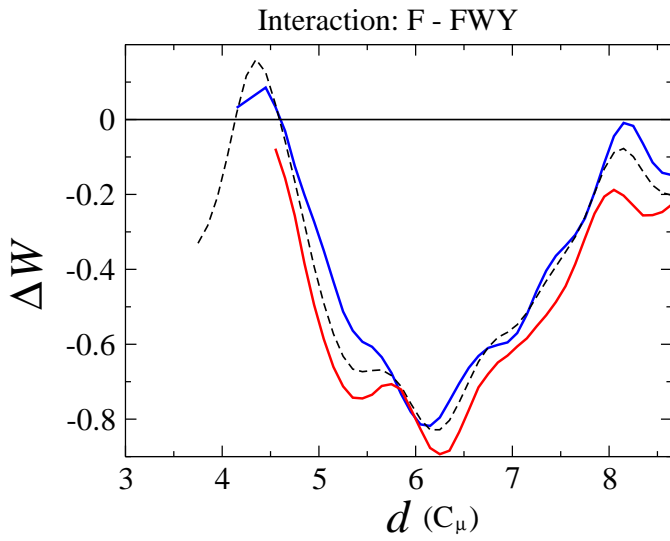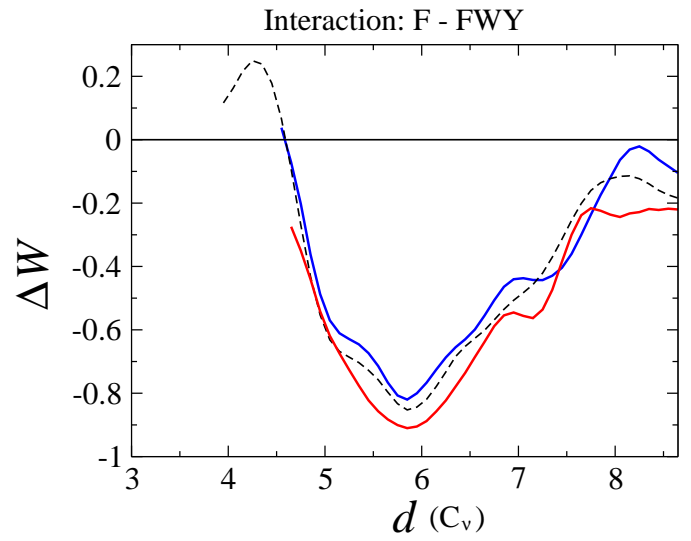

S19)

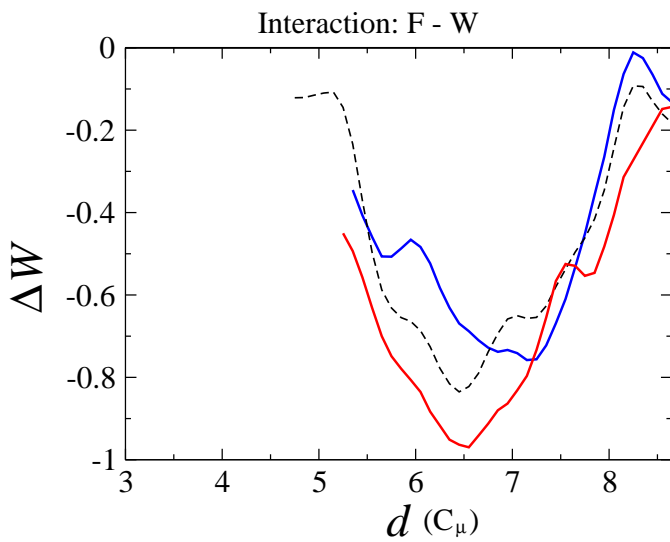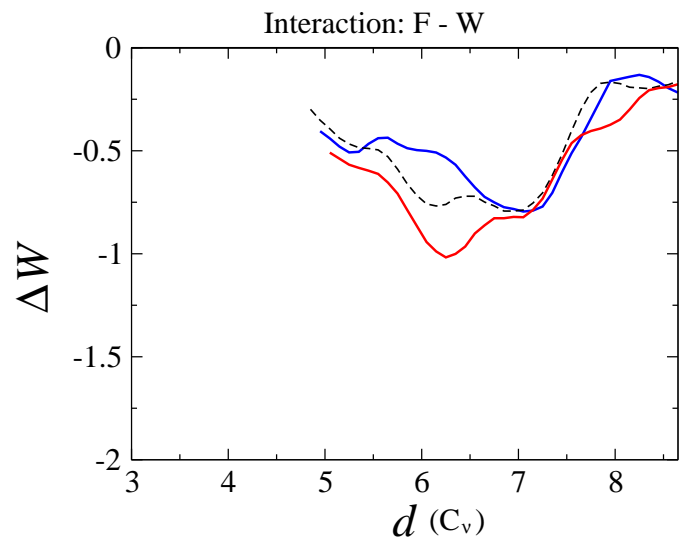



S20)

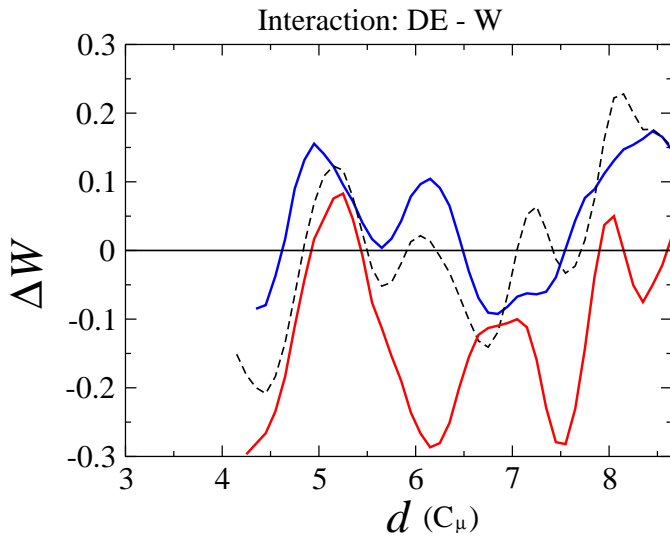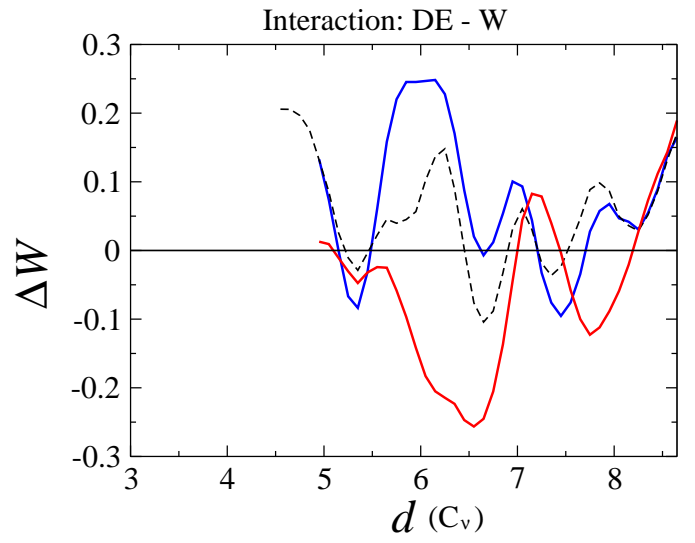

S21)

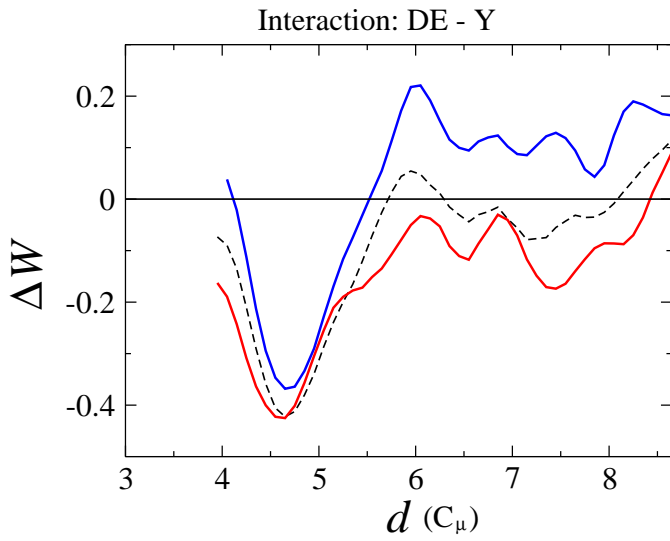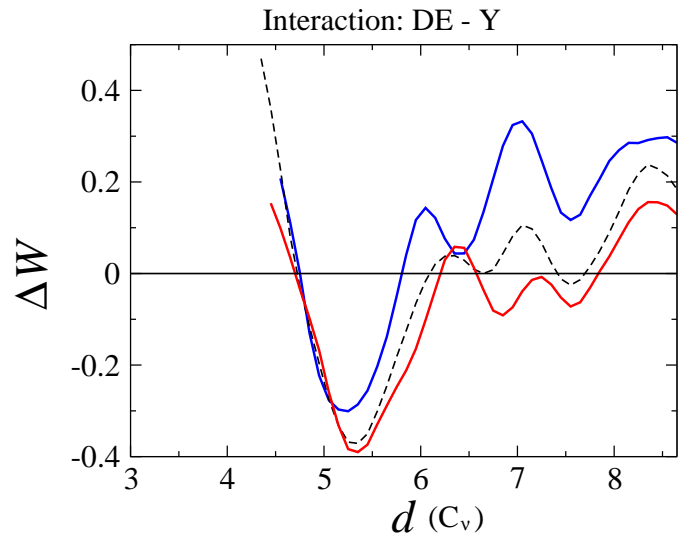

S22)

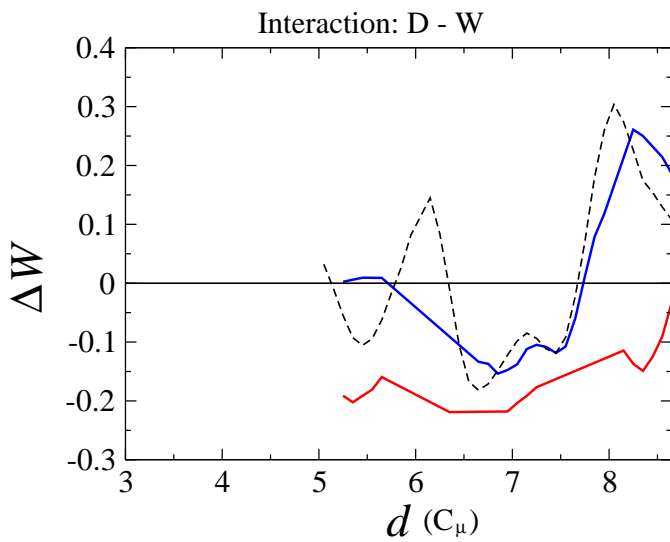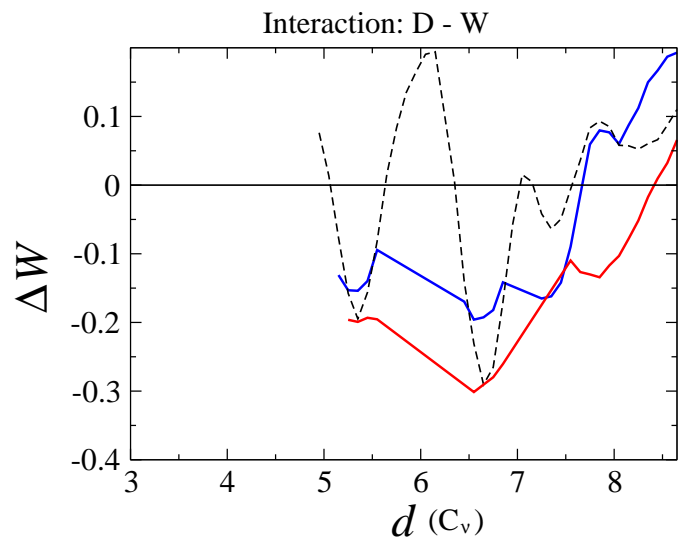

S23)

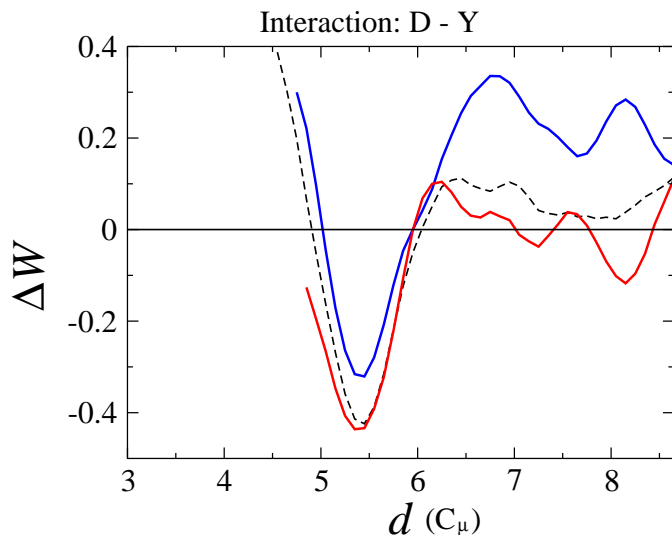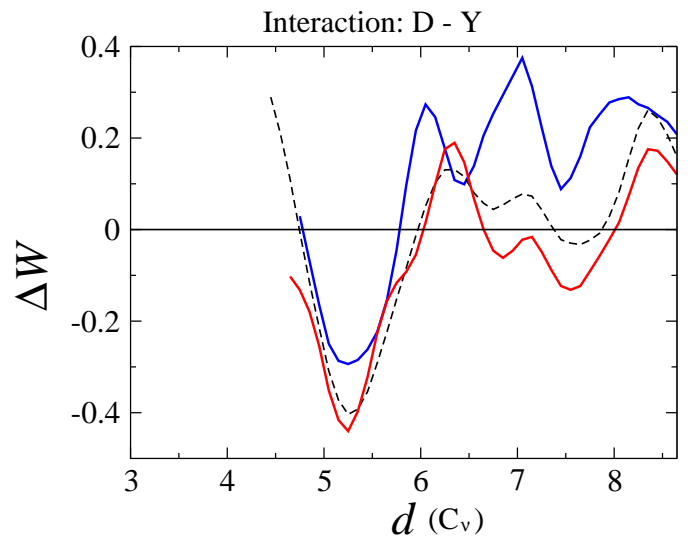

S24)

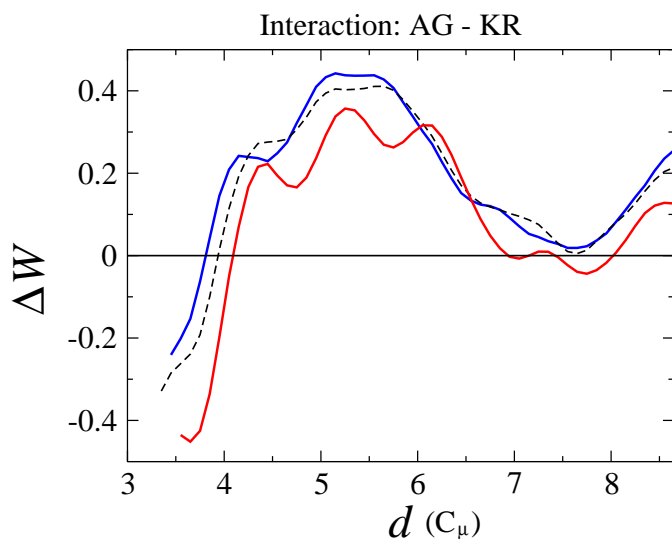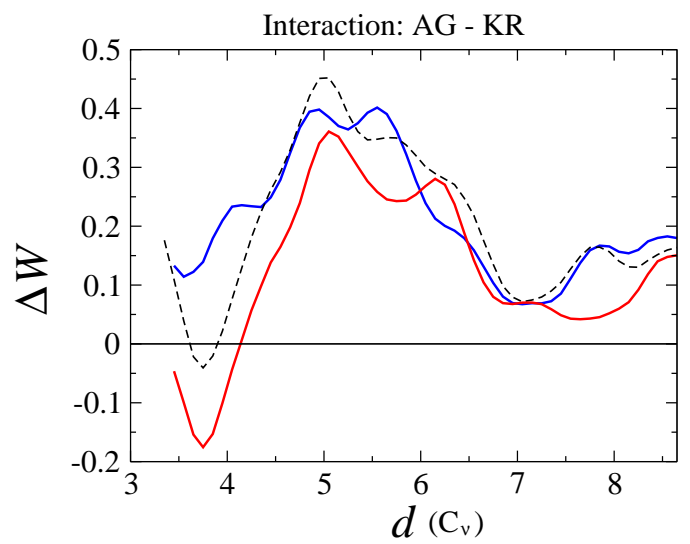

S25)

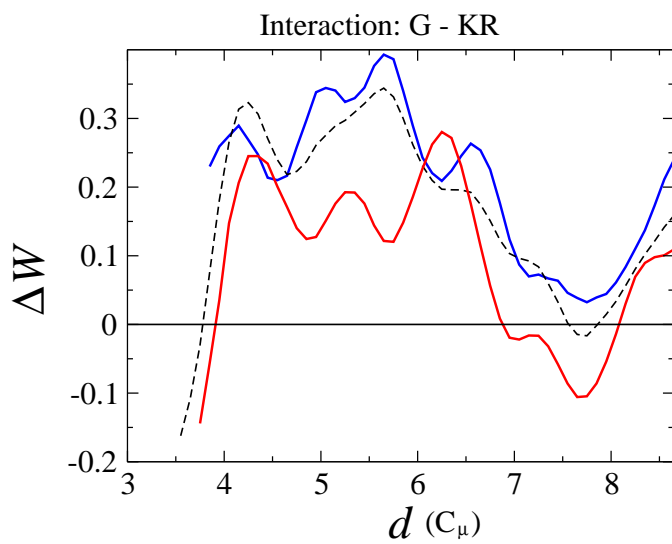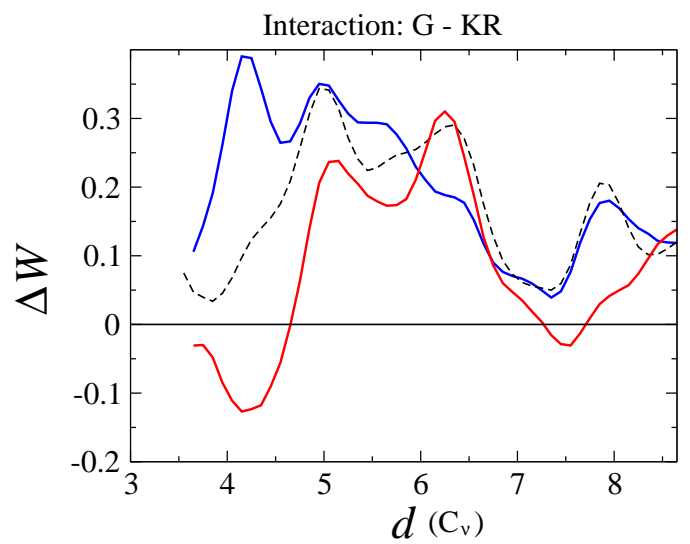

S26)

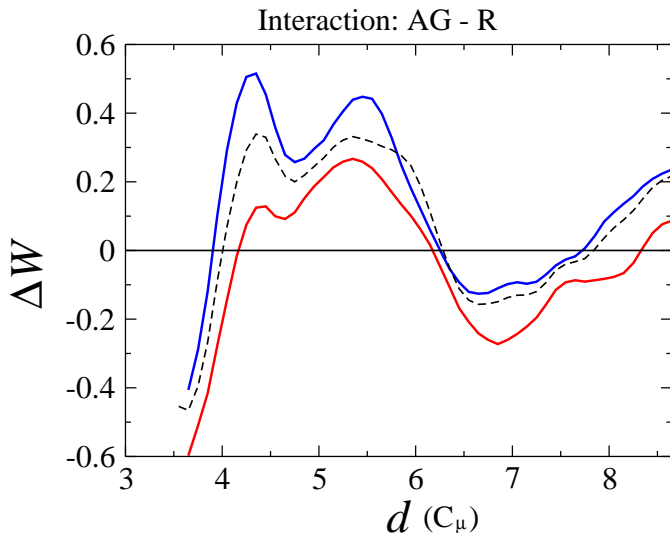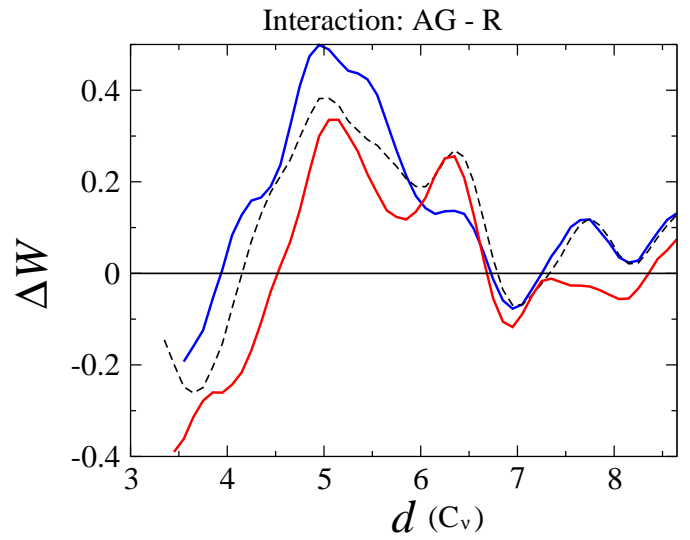

S27)

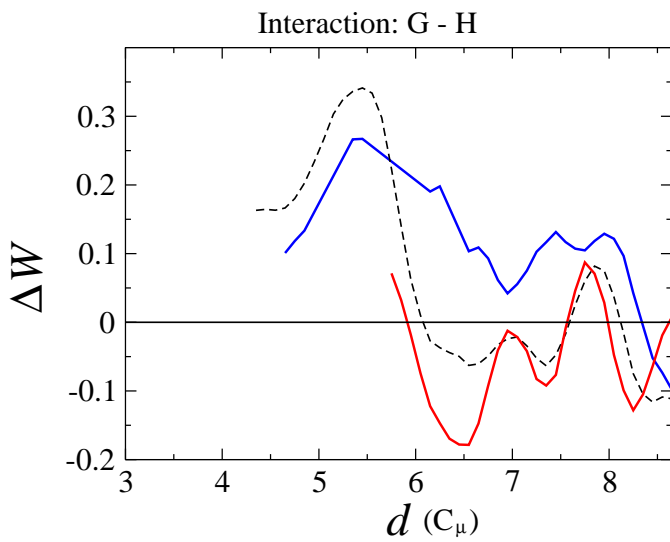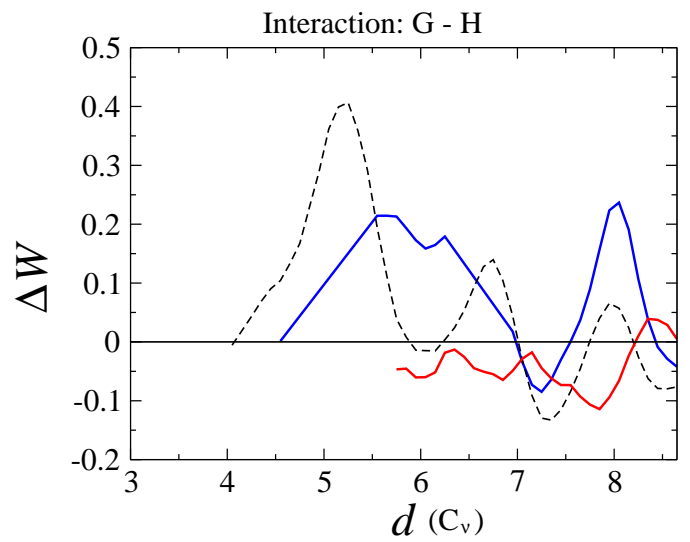

S28)

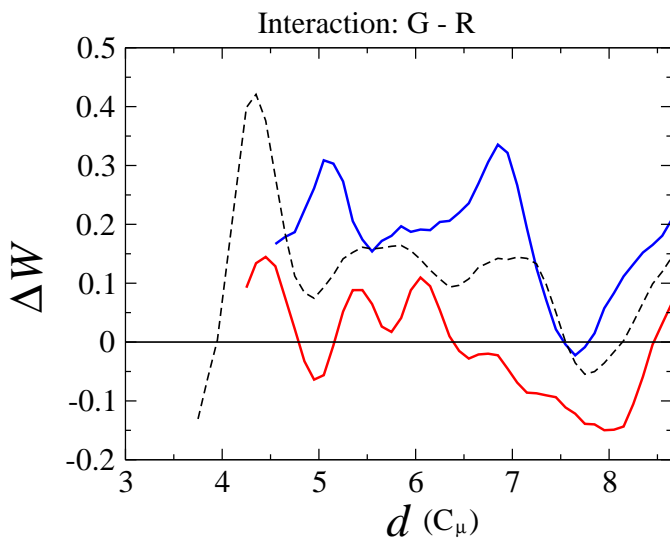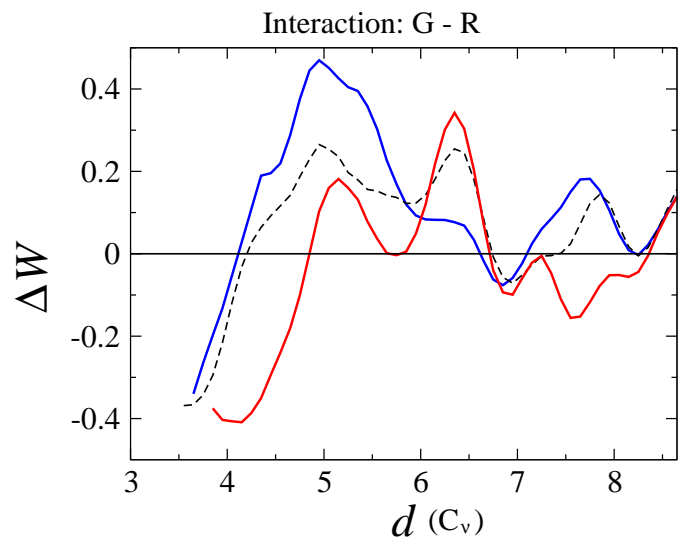

S29)

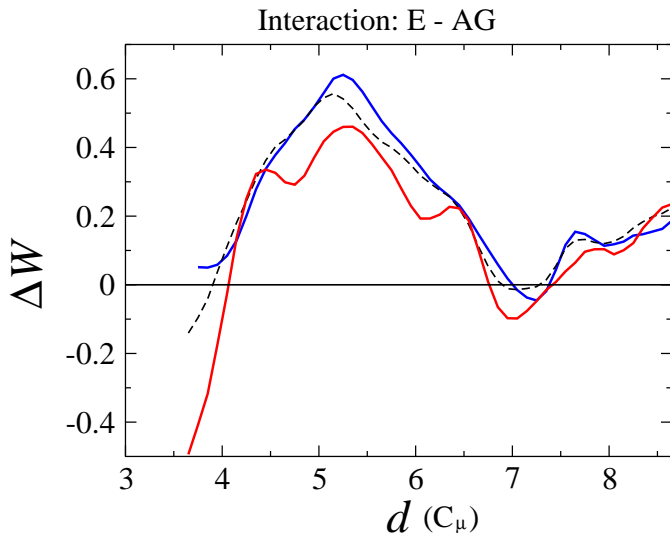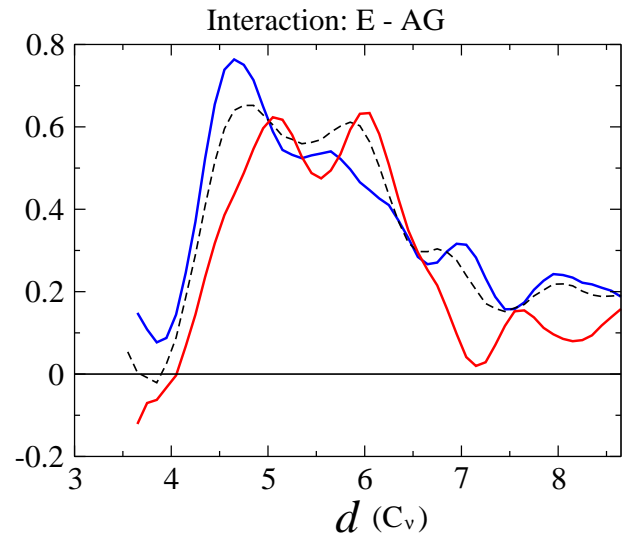

S30)

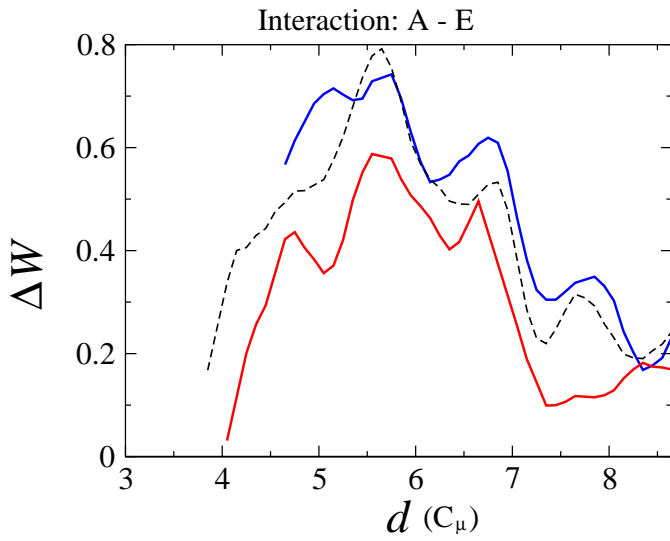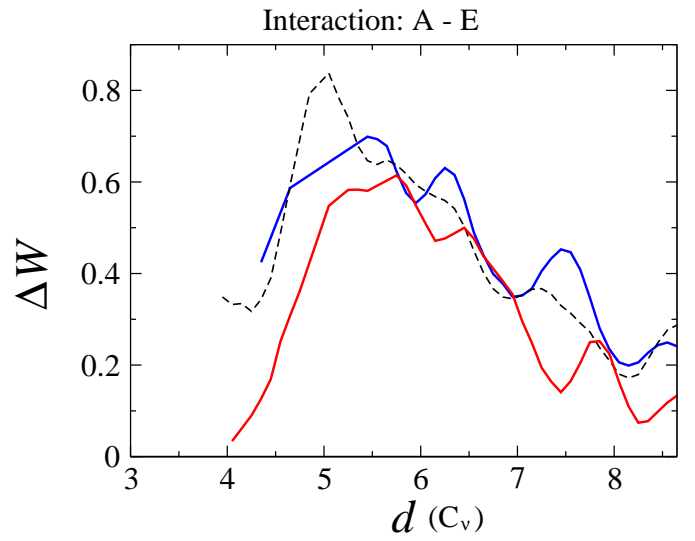

S31)

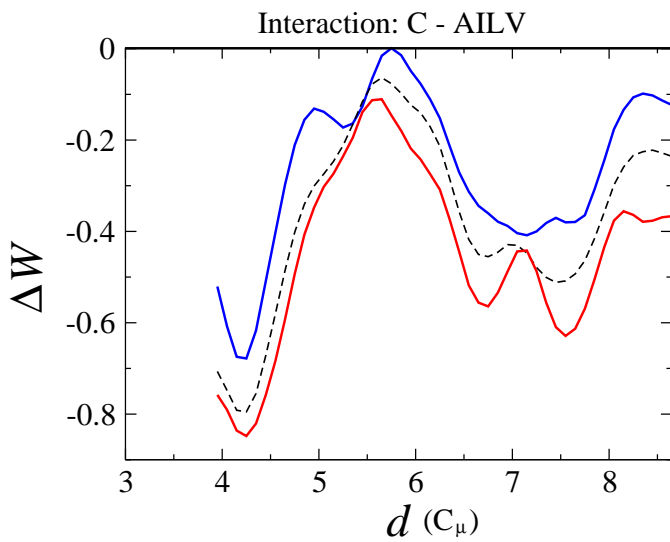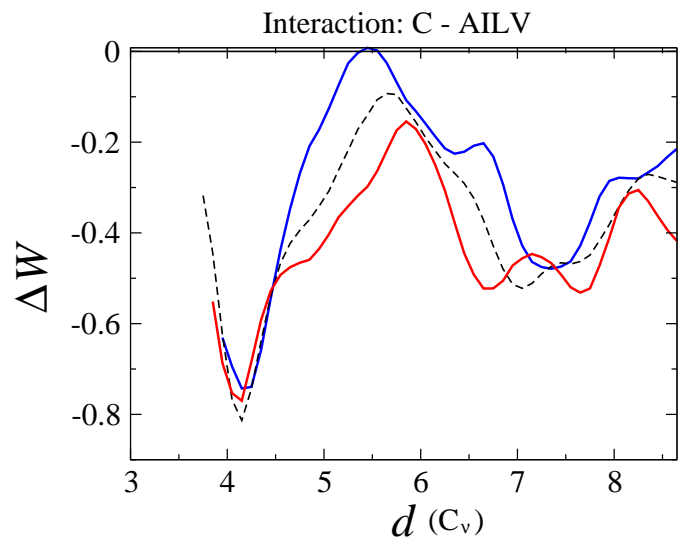

S32)

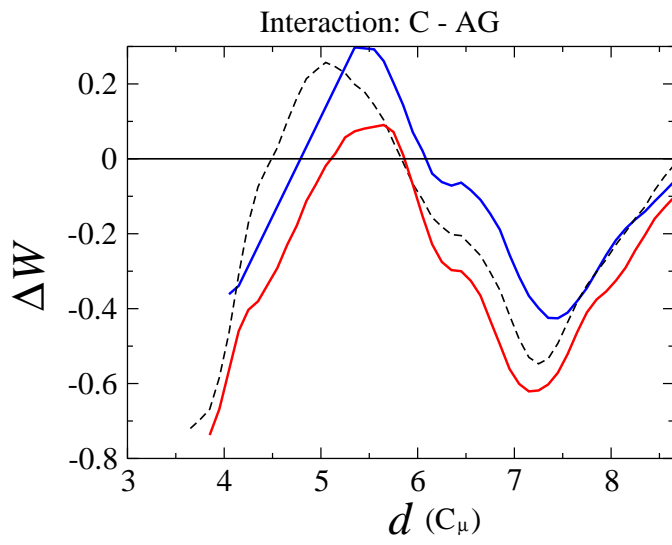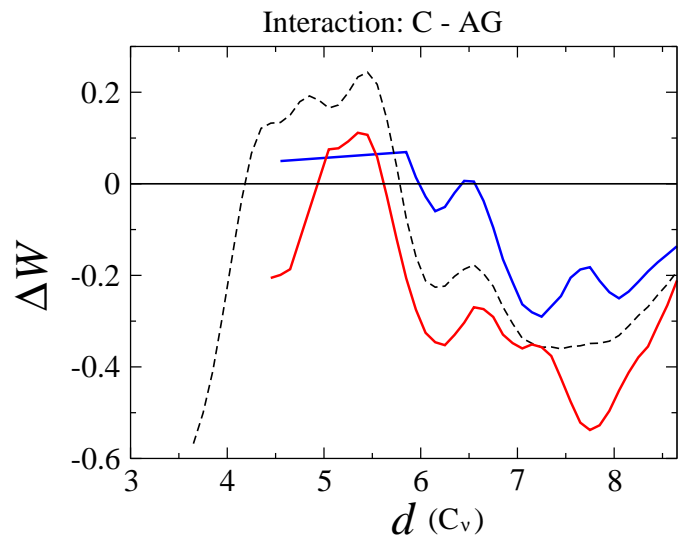

S33)

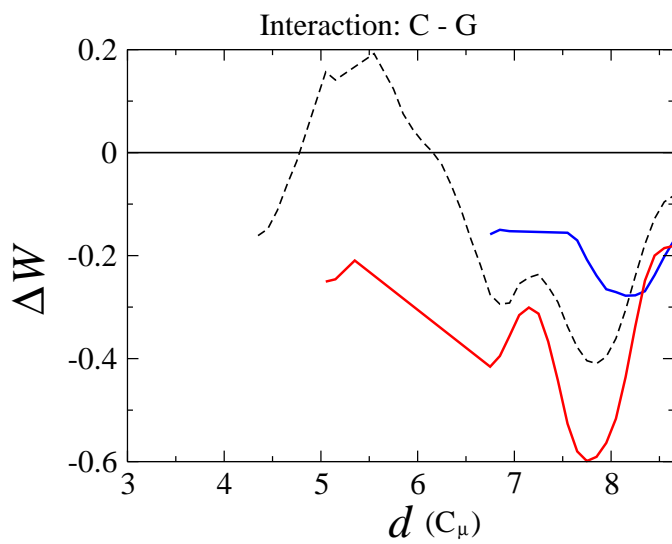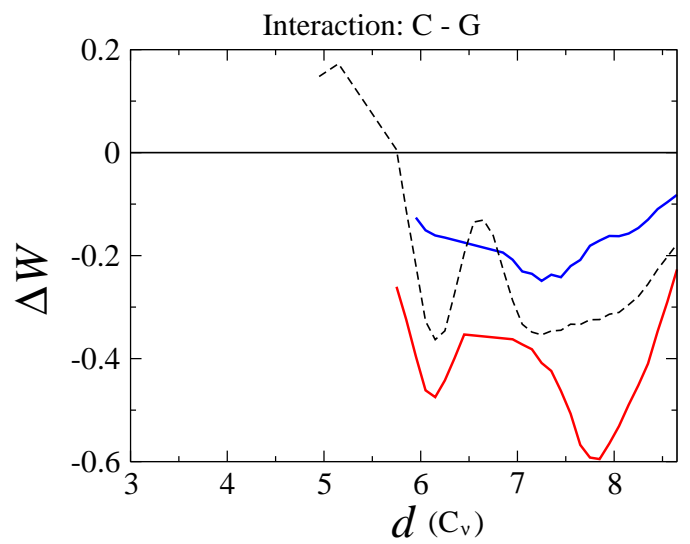

S34)

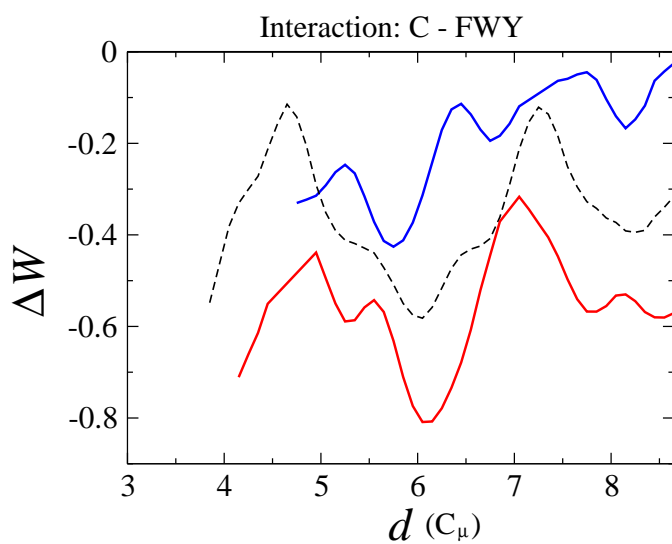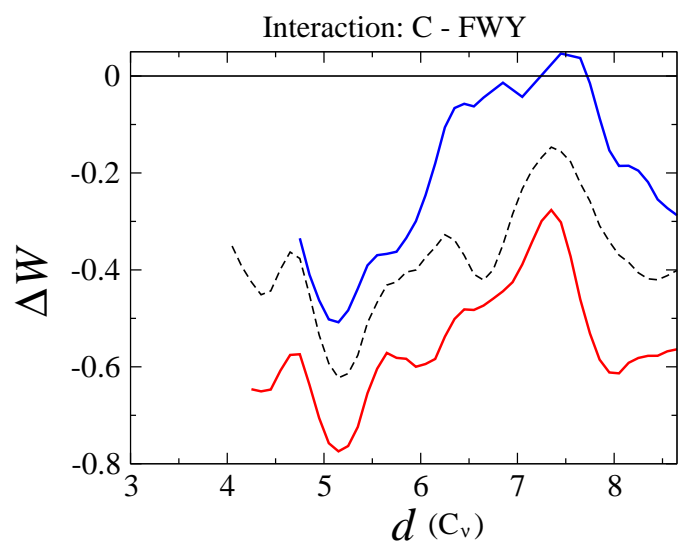

S35)

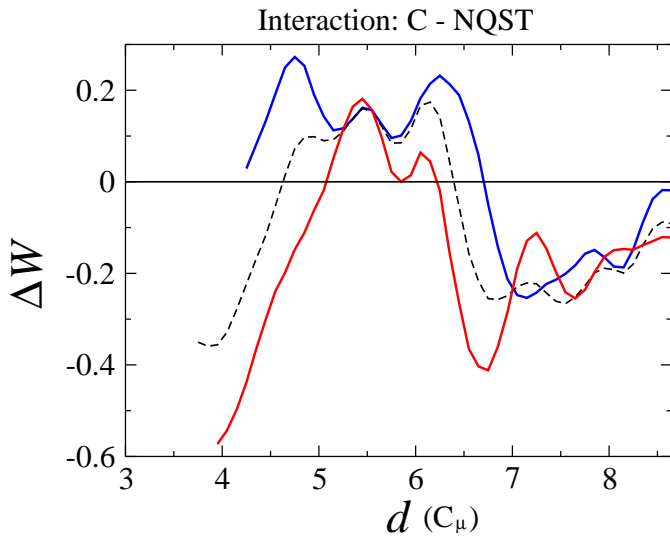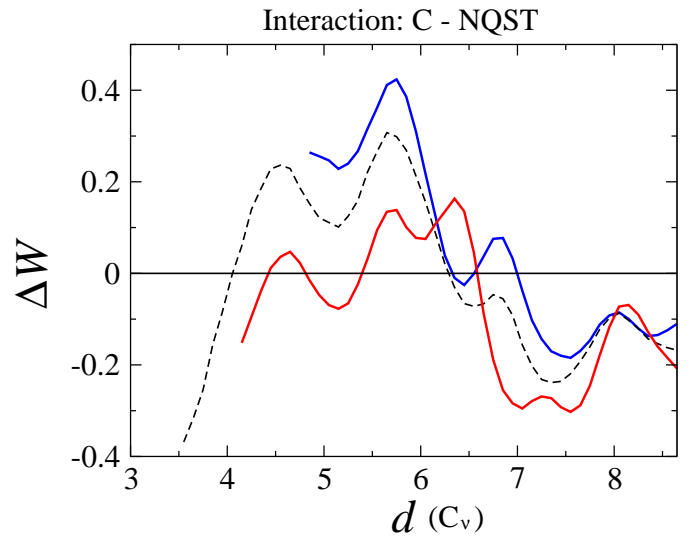

S36)

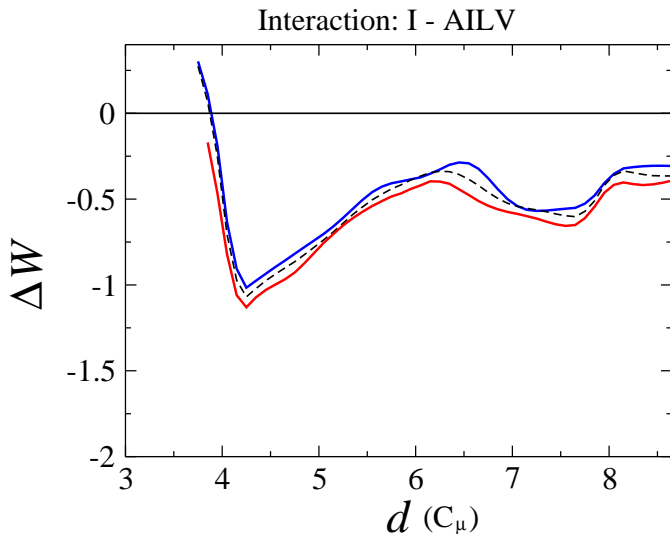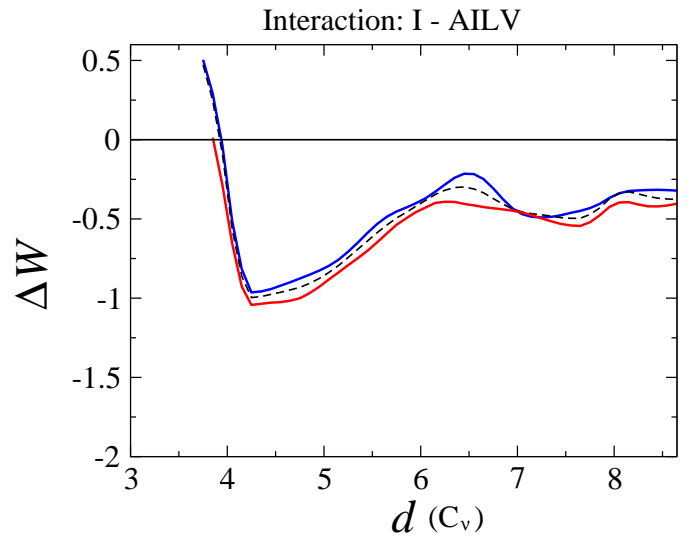

S37)

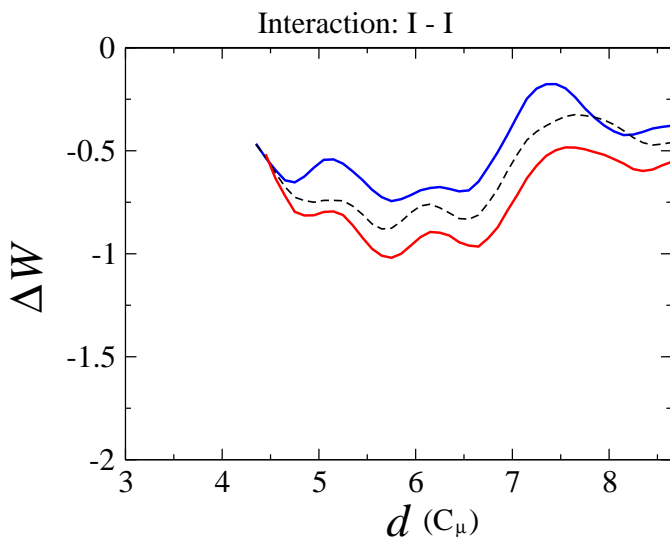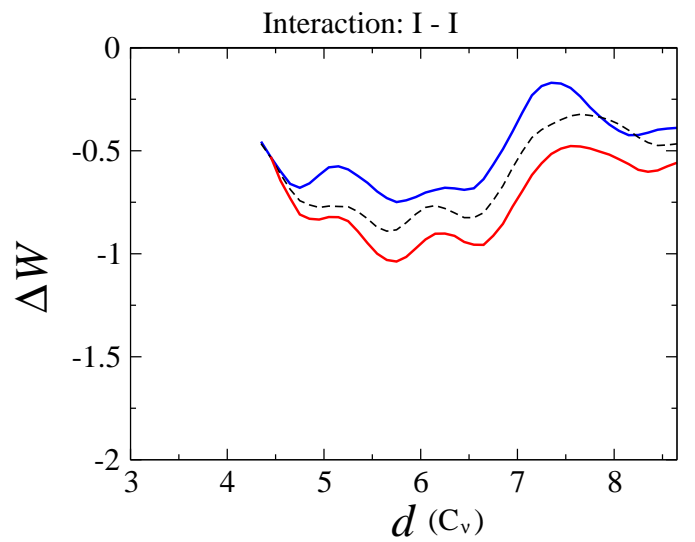

S38)

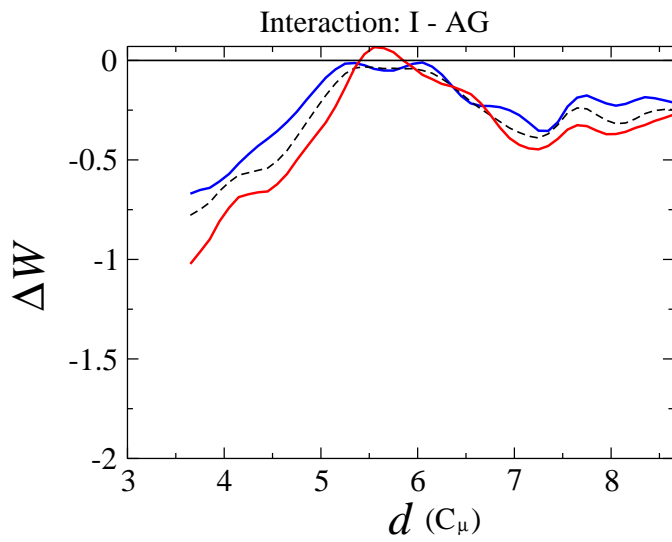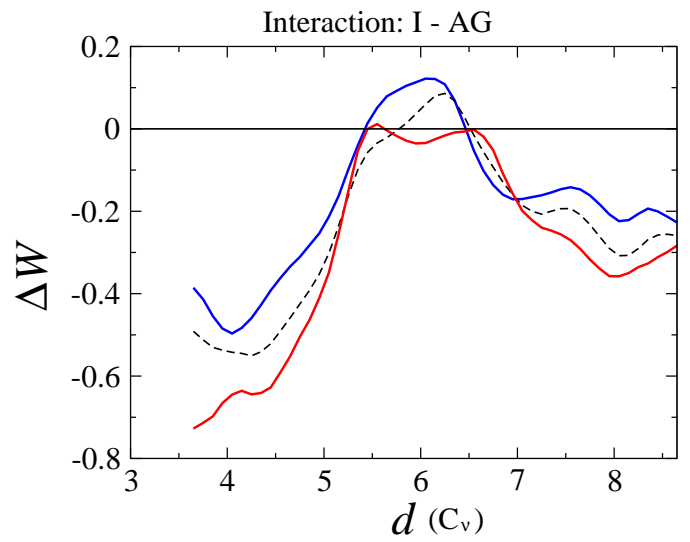

S39)

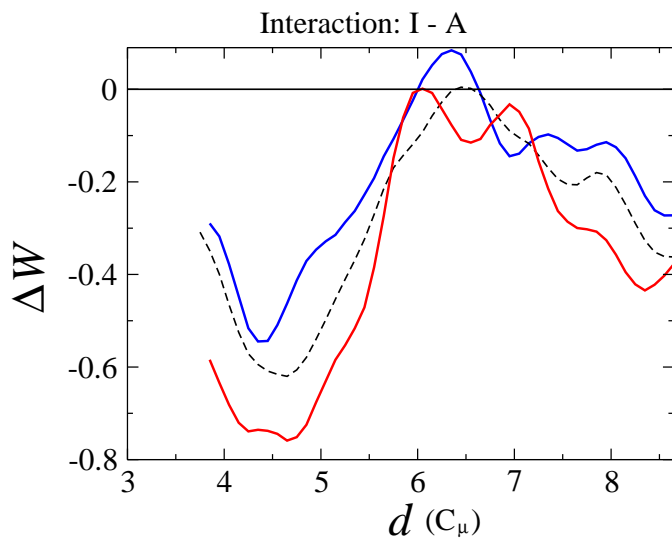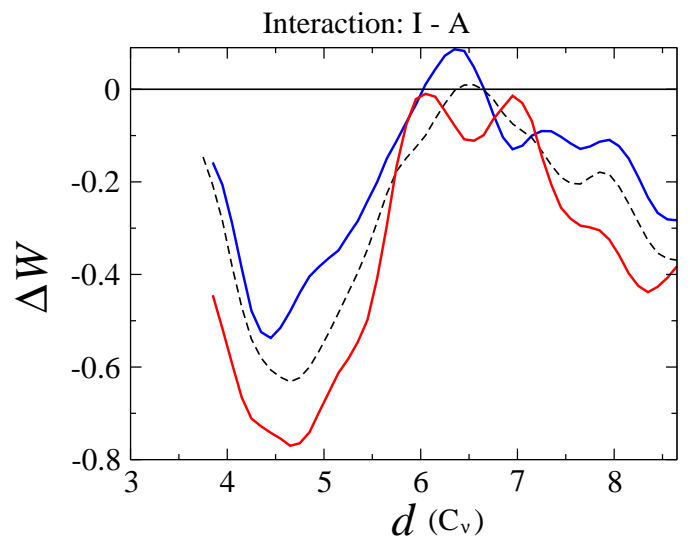

S40)

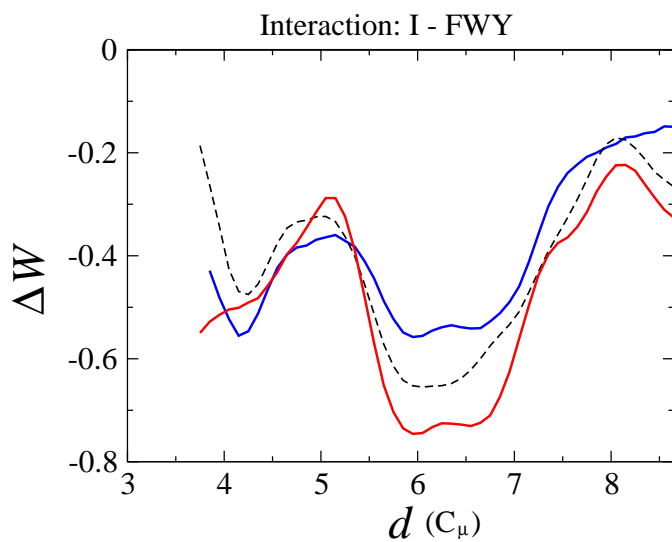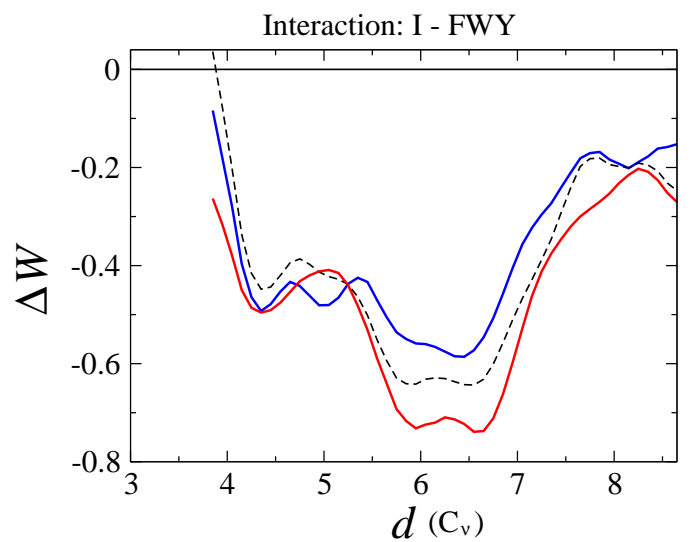

S41)

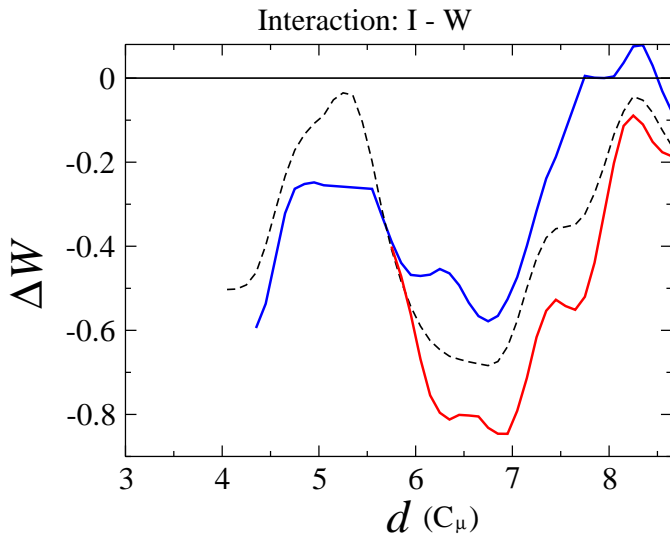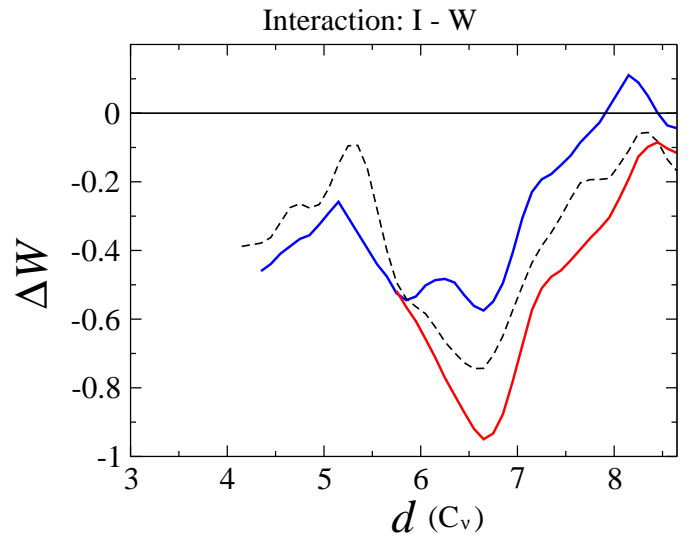

S42)

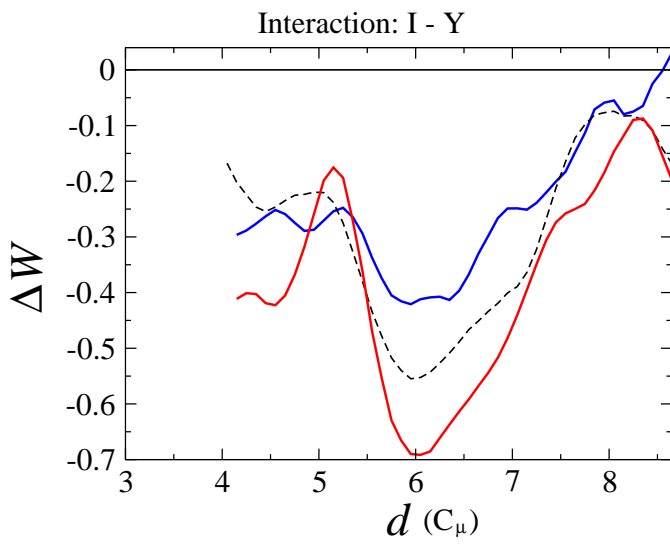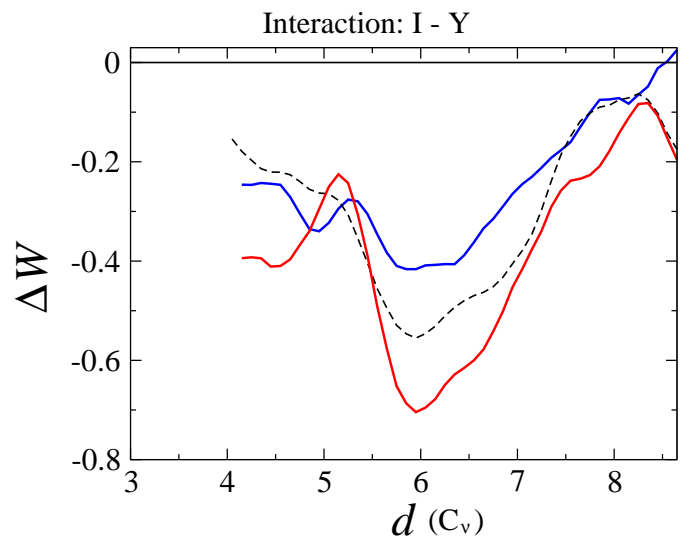

S43)

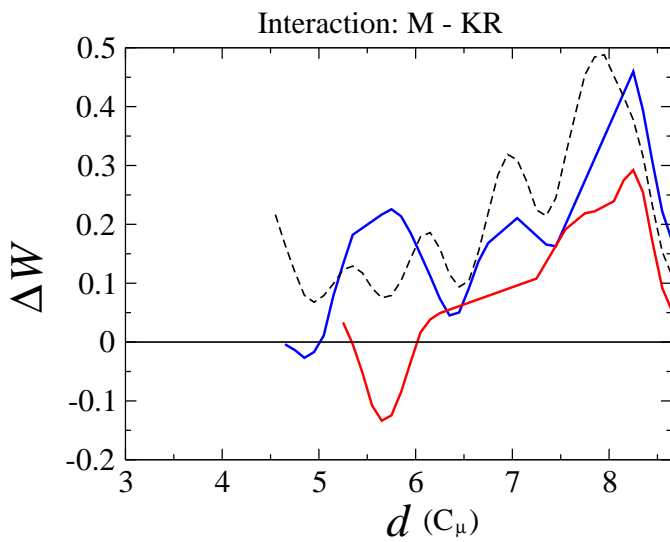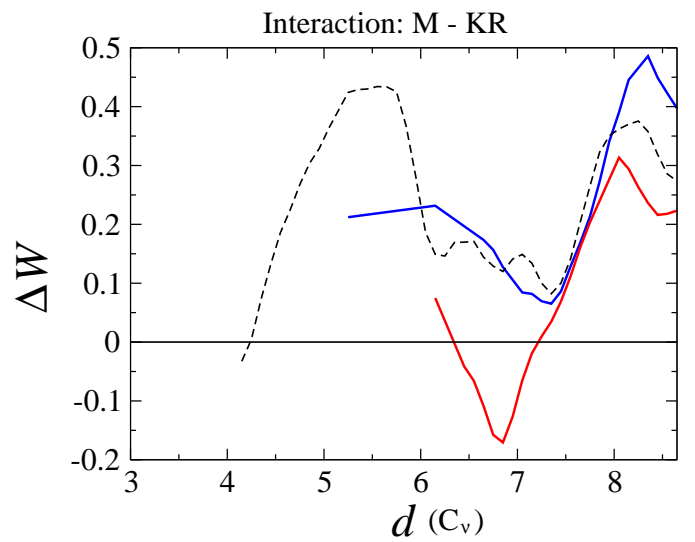



S44)

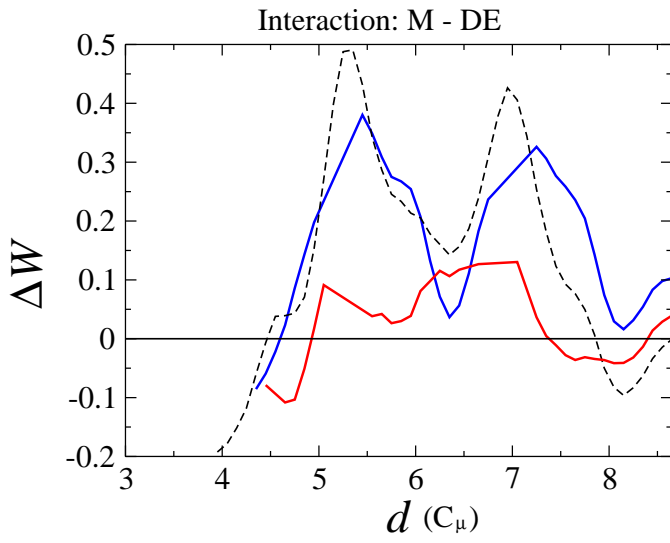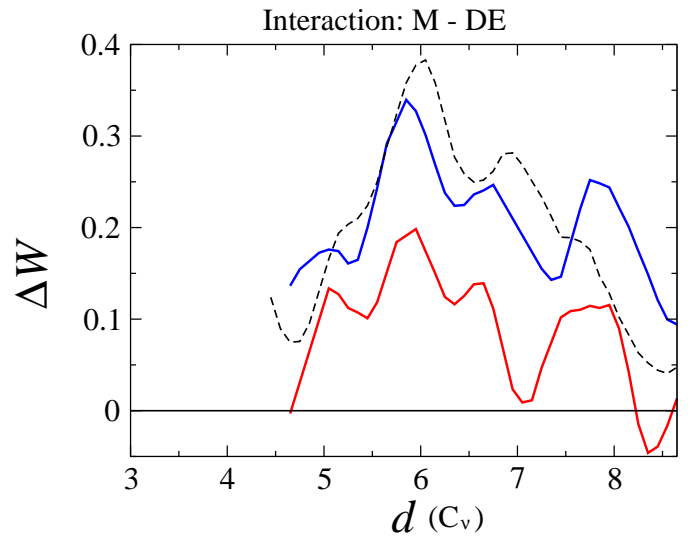

S45)

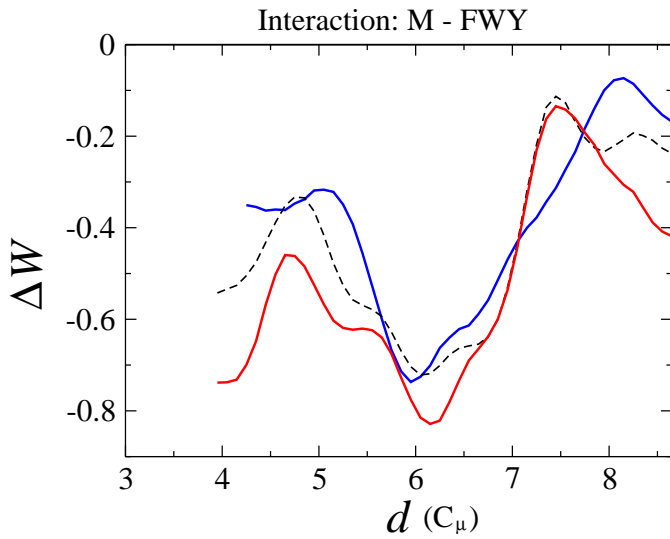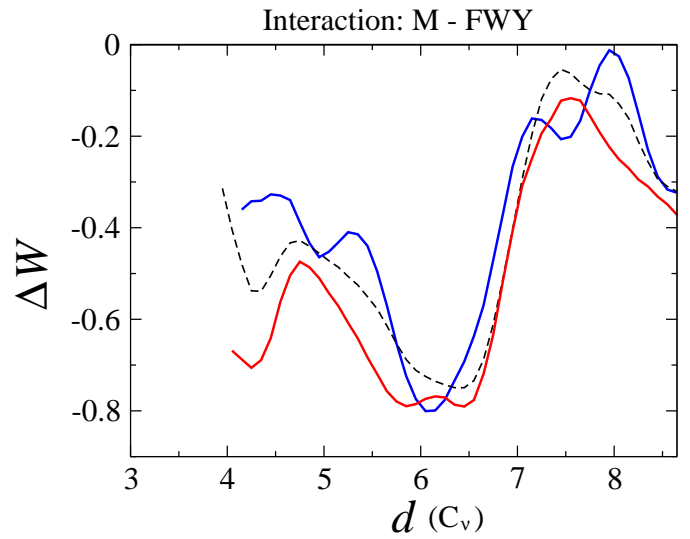

S46)

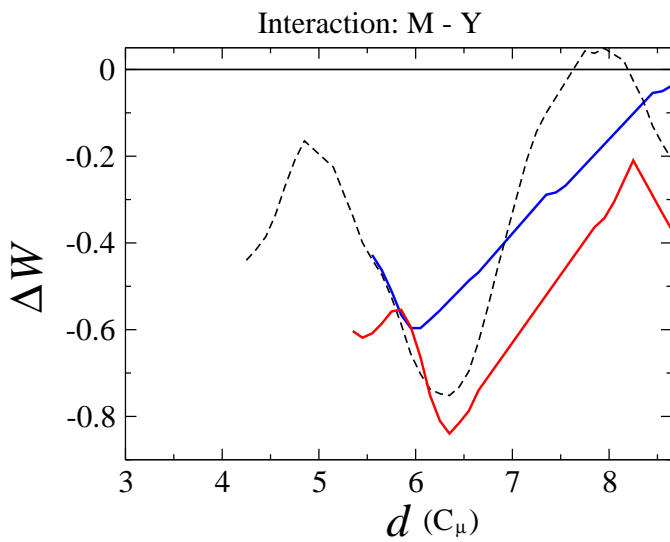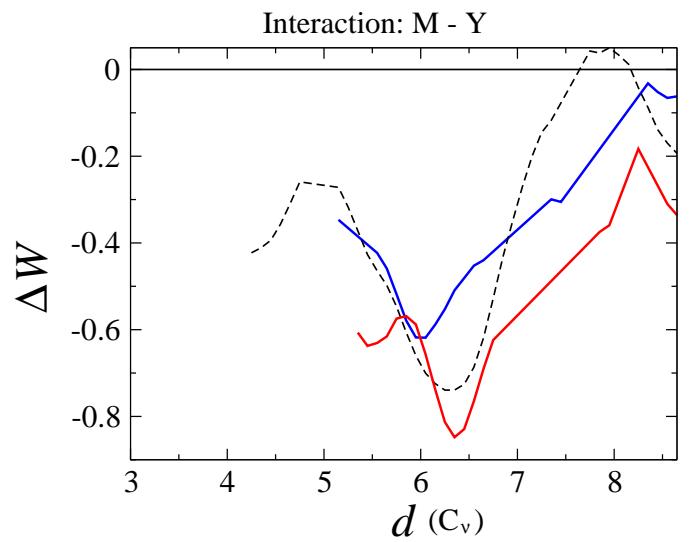

S47)

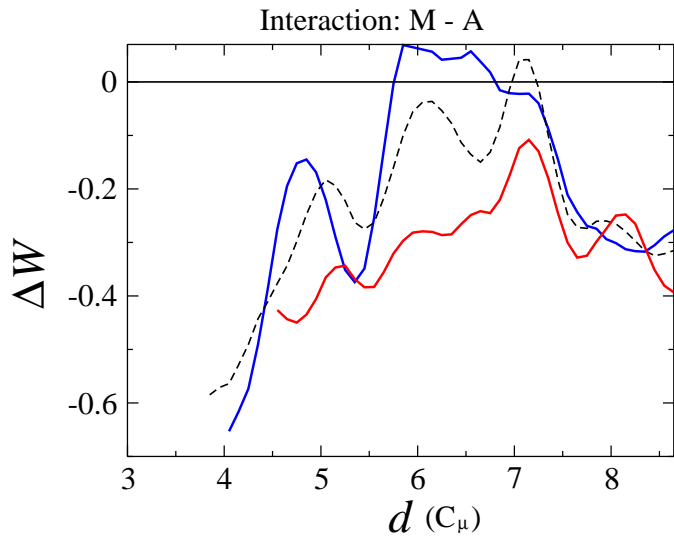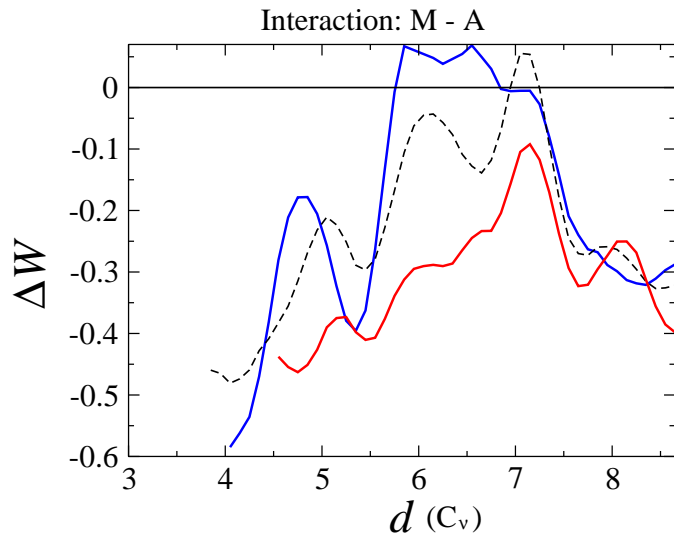

S48)

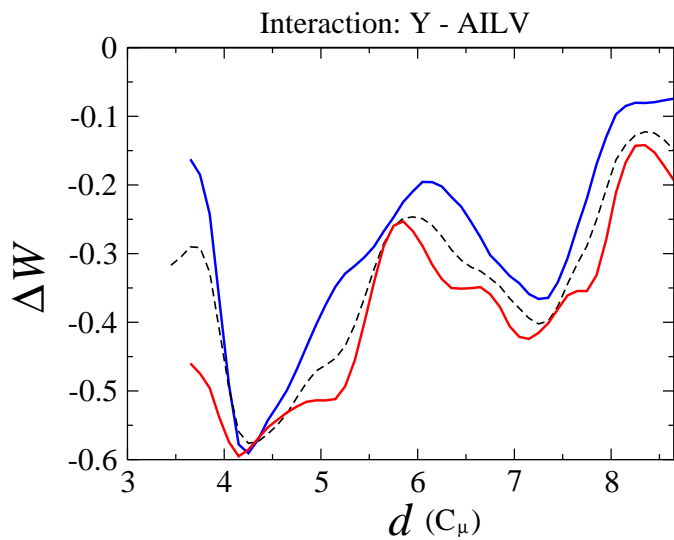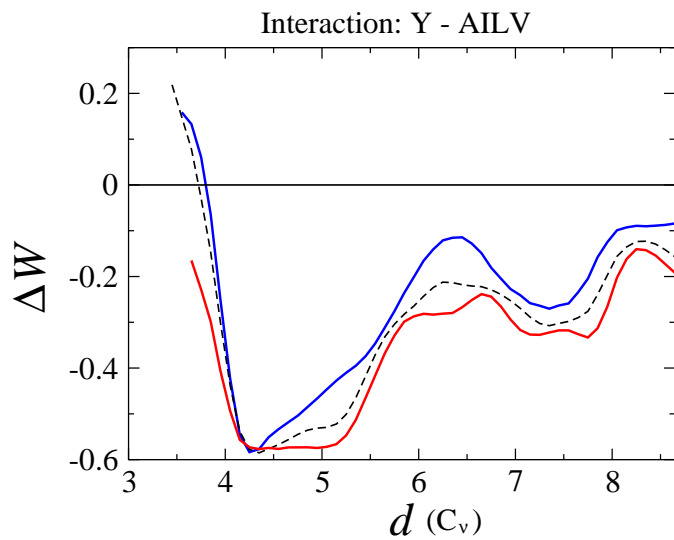

S49)

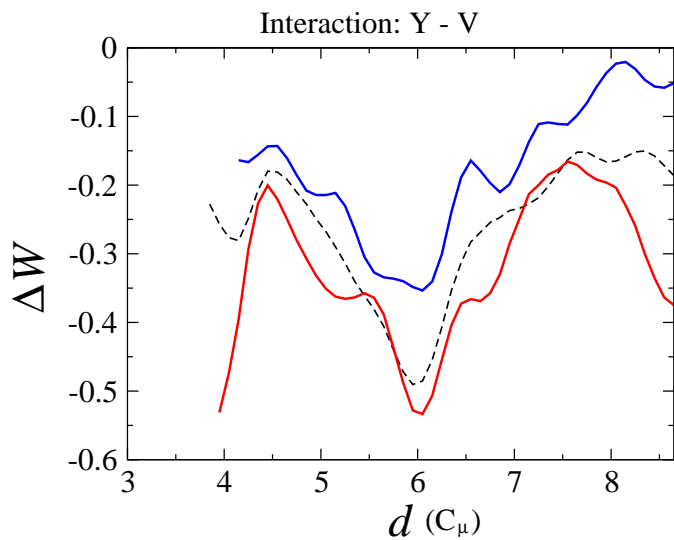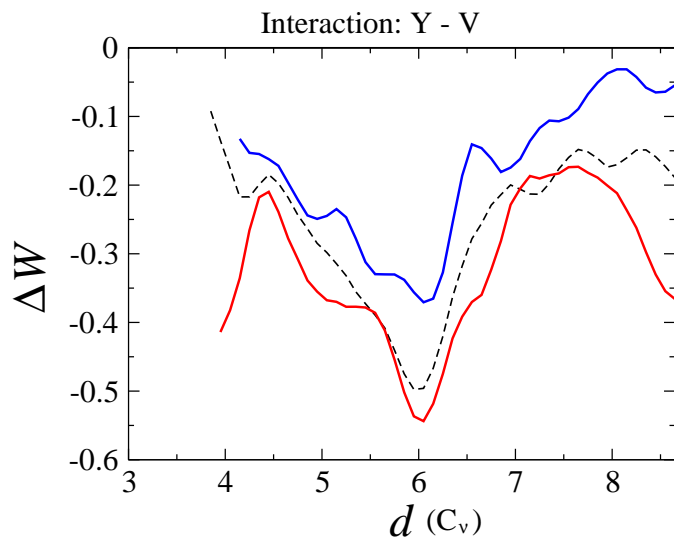

S50)

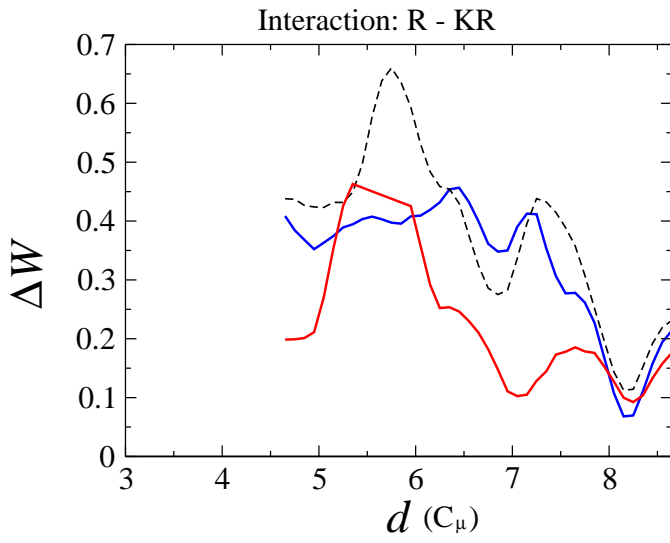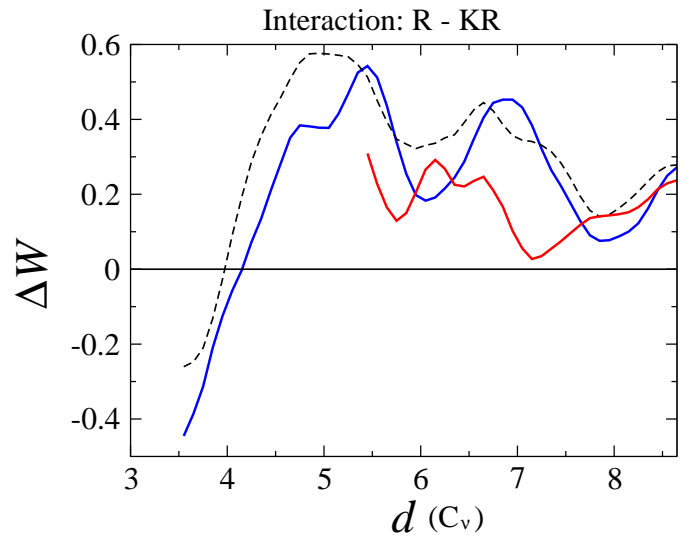

S51)

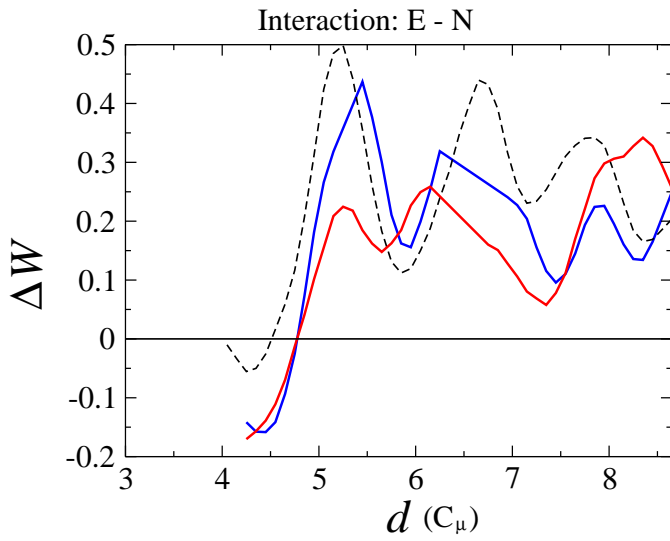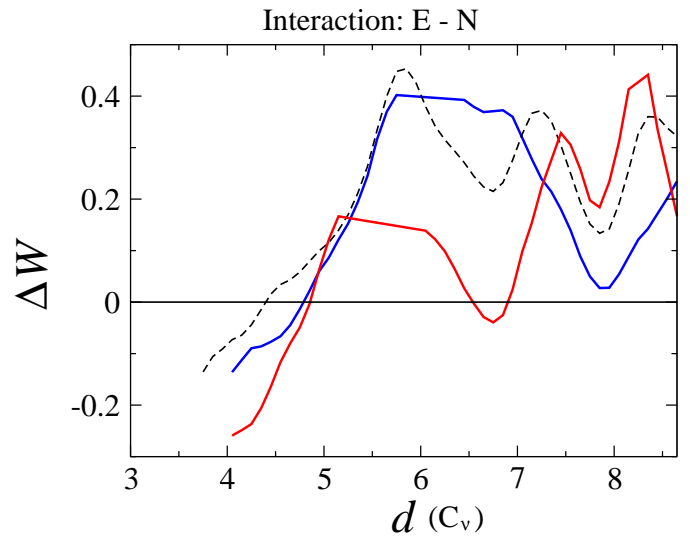

S52)

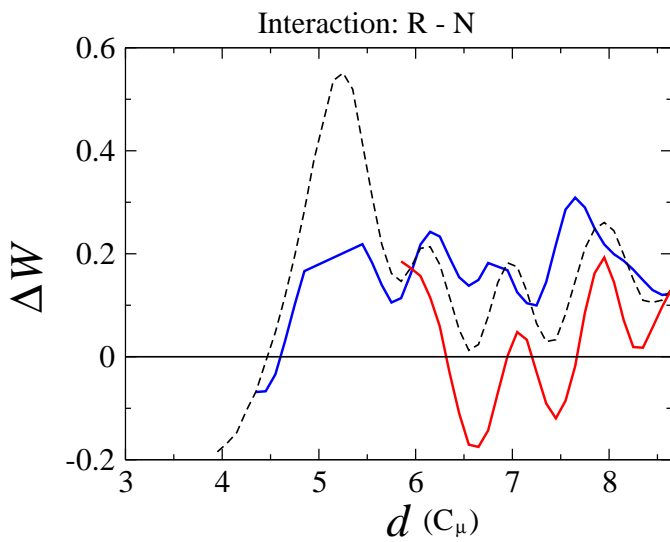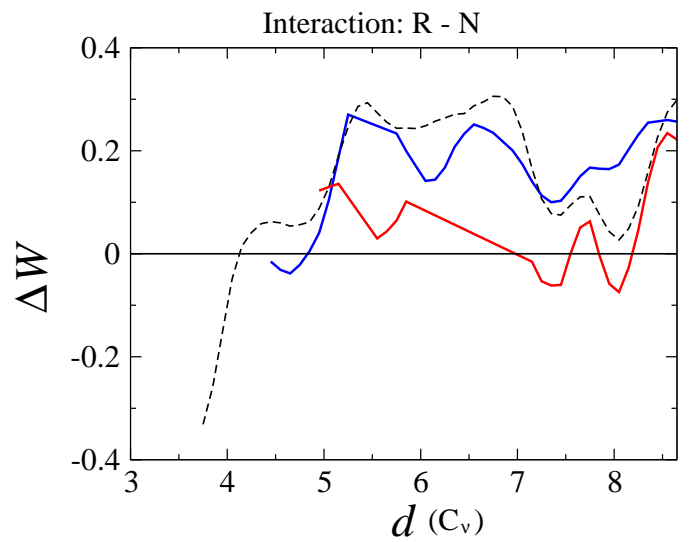

S53)

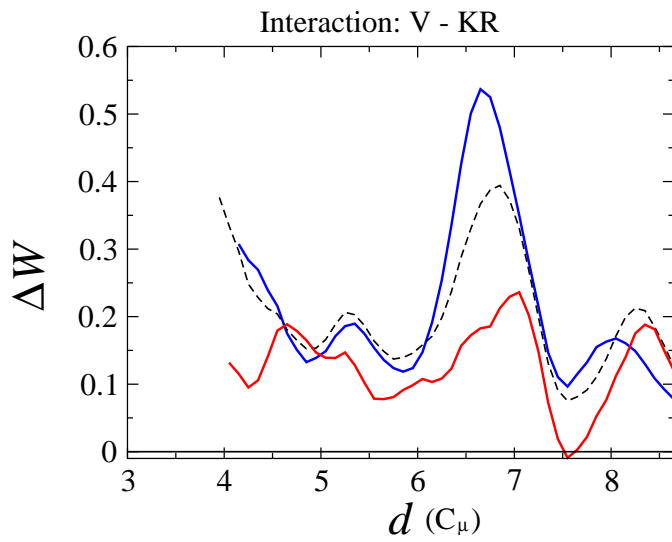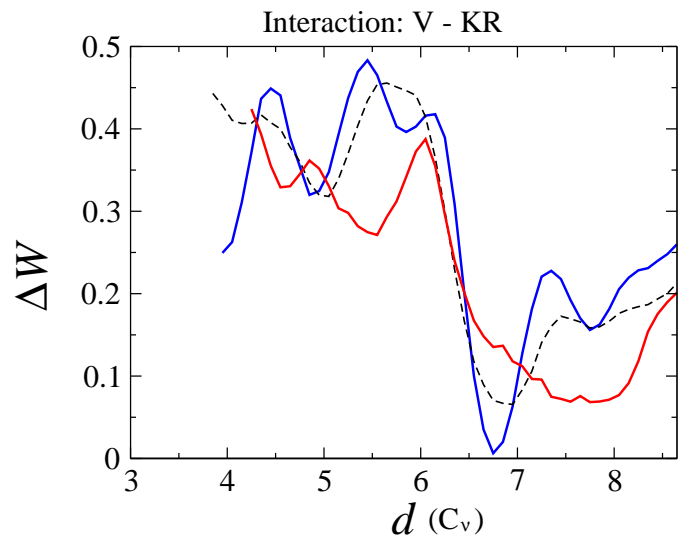

S54)

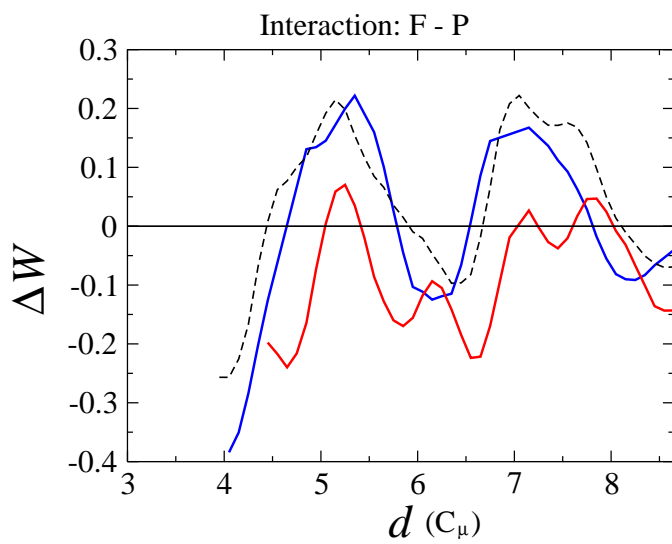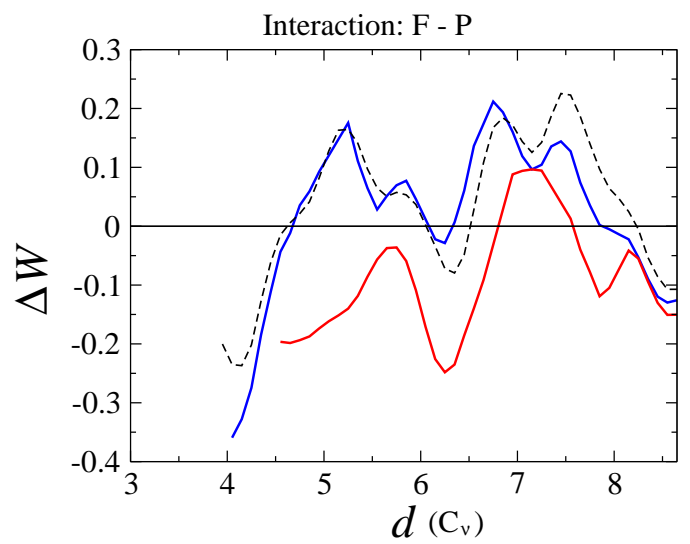

S55)

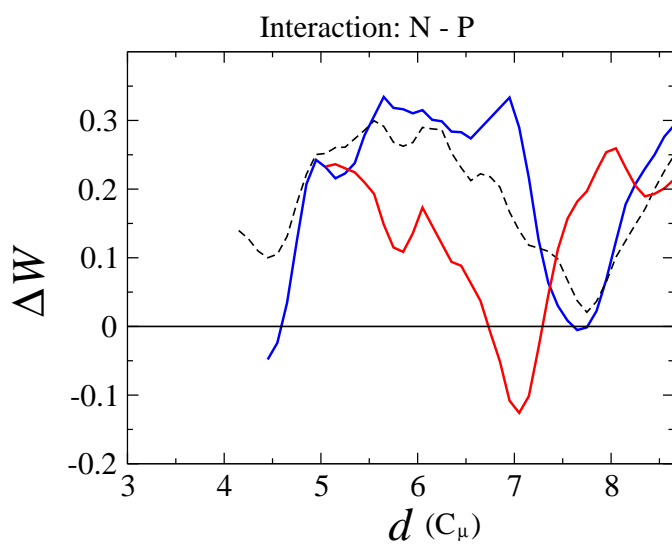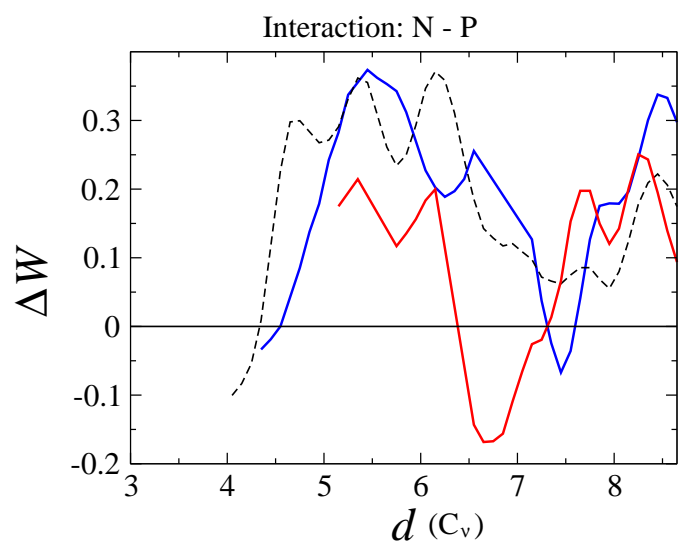

S56)

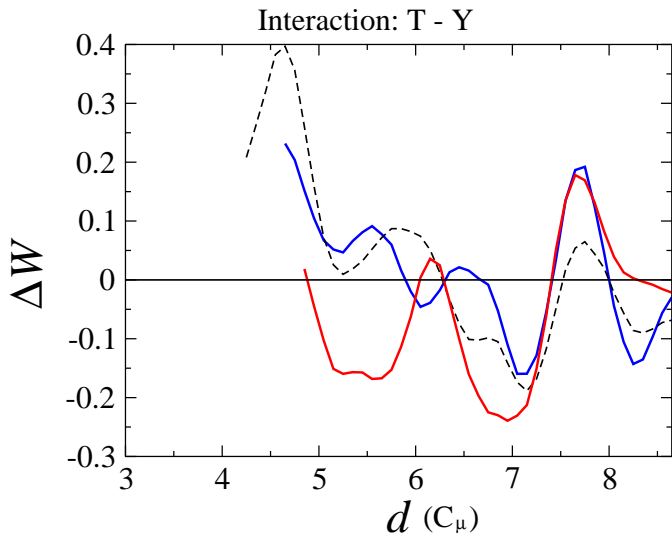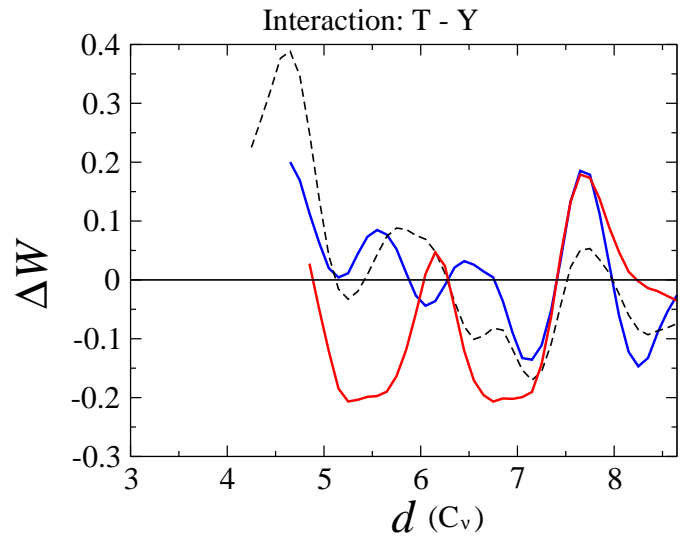

## Figures S57-S86 - Mesostabilizing interaction potentials

Folding free energy contribution  $\Delta W$  (kcal/mol) as a function of the distance  $d$  between side chain descriptors for the thermoresistant protein subset (red), the mesoresistant one (blue), and the reference set (dashed line). Left plots are based on  $C_\mu$  descriptors and right plots on the  $C_v$  descriptors.

S57)

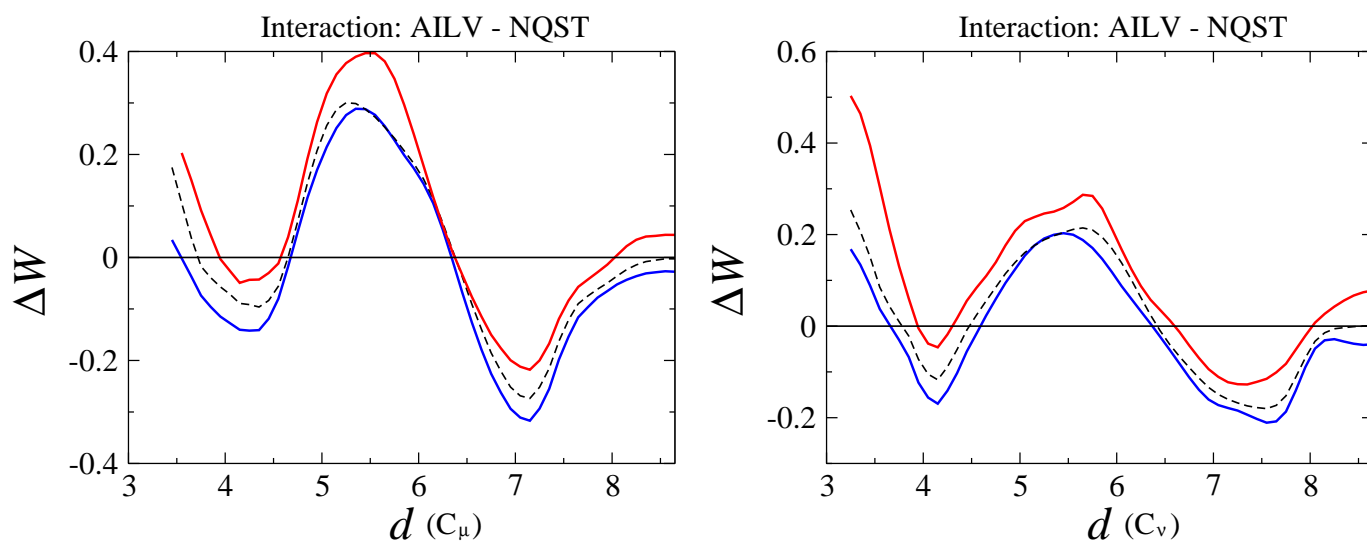

S58)

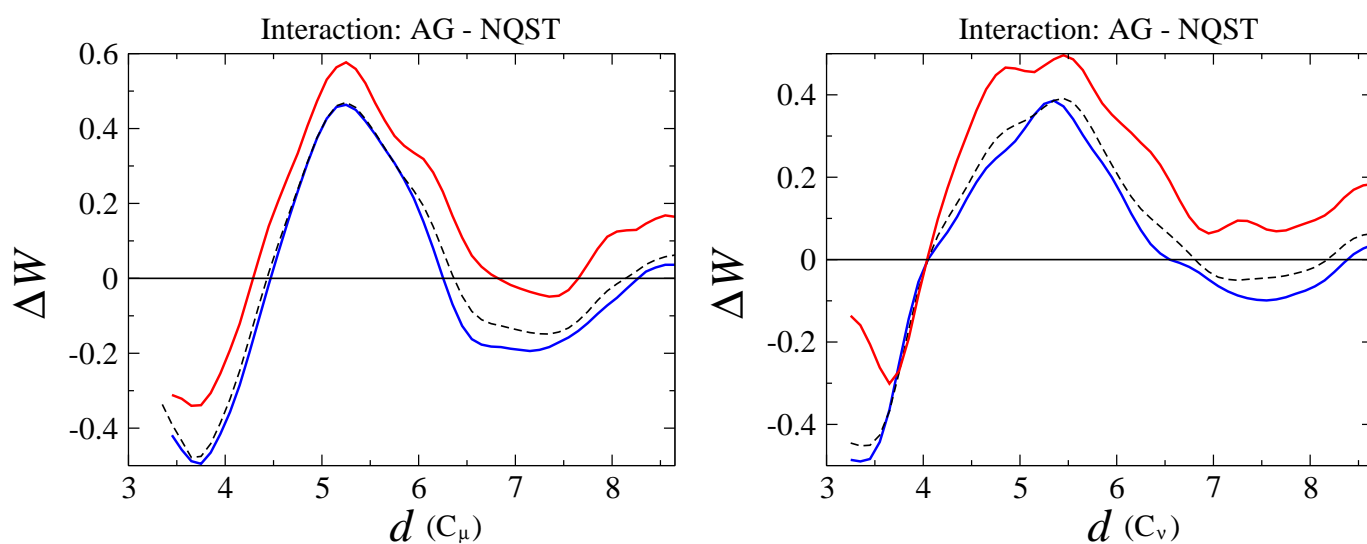

S59)

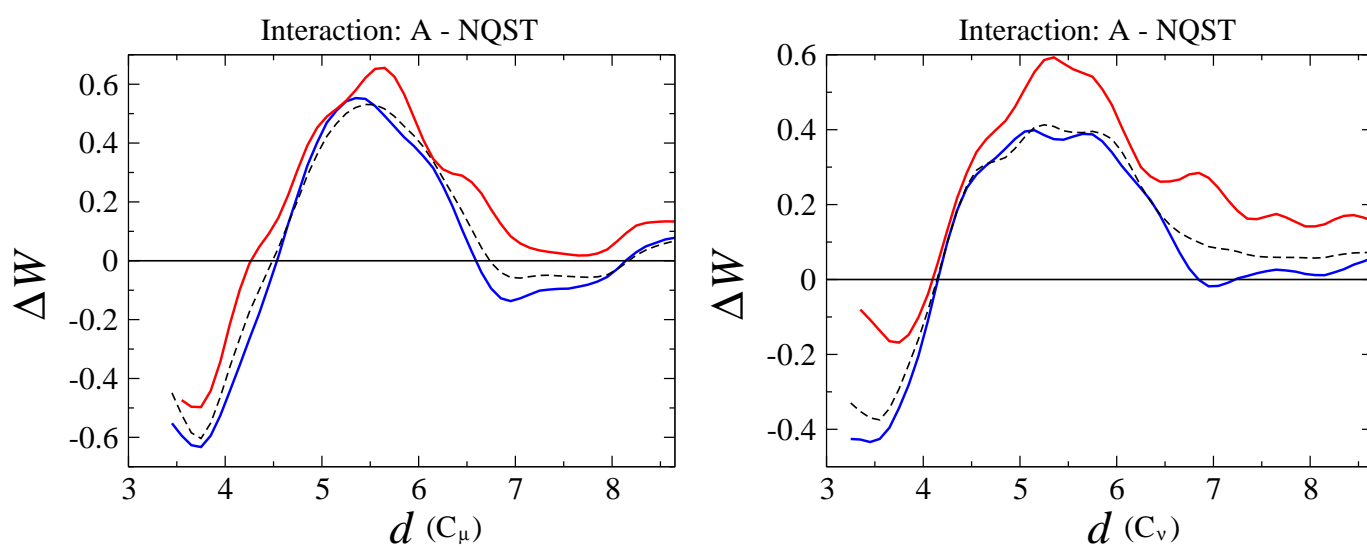

S60)

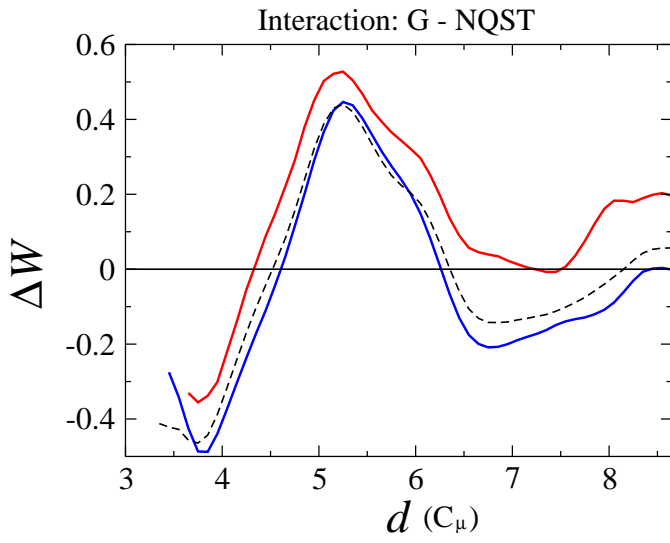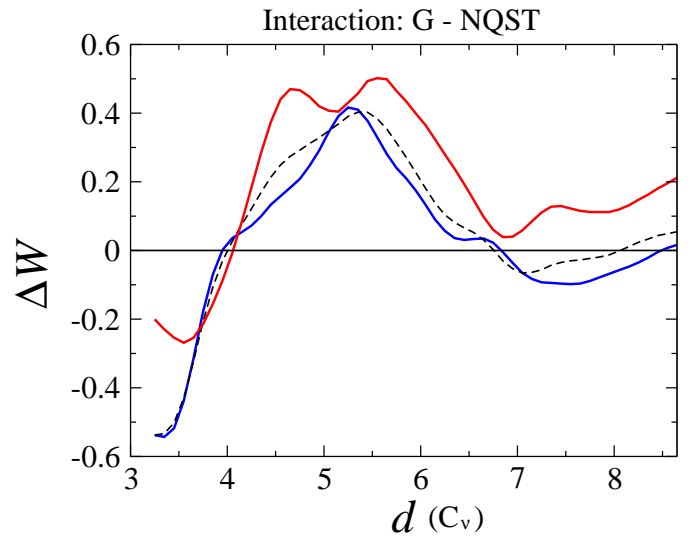

S61)

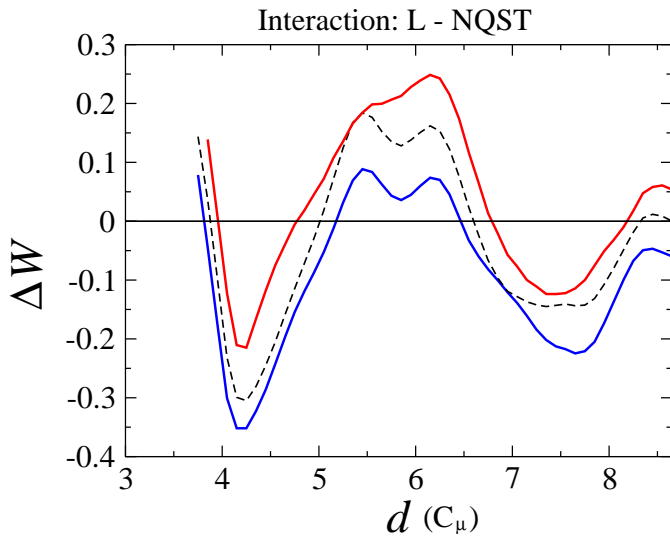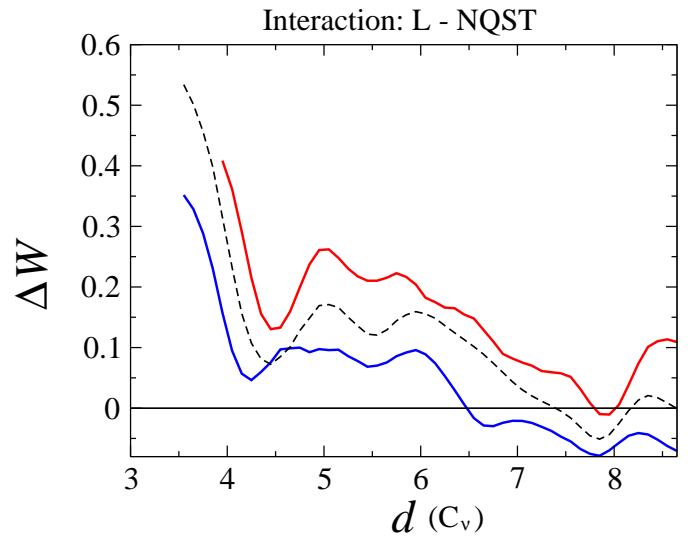

S62)

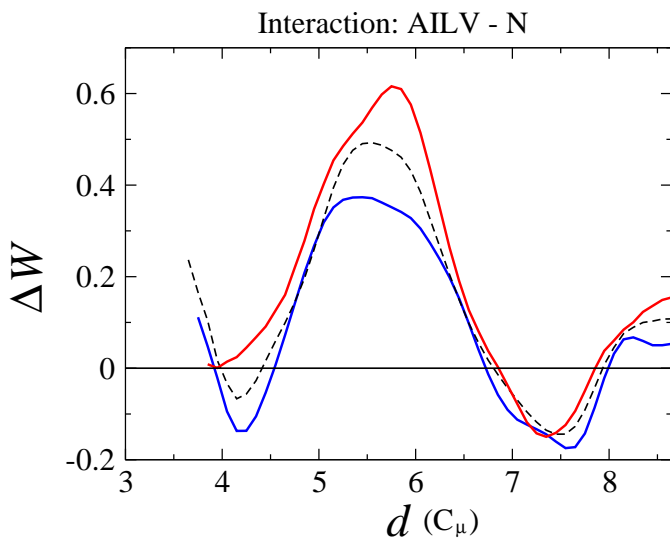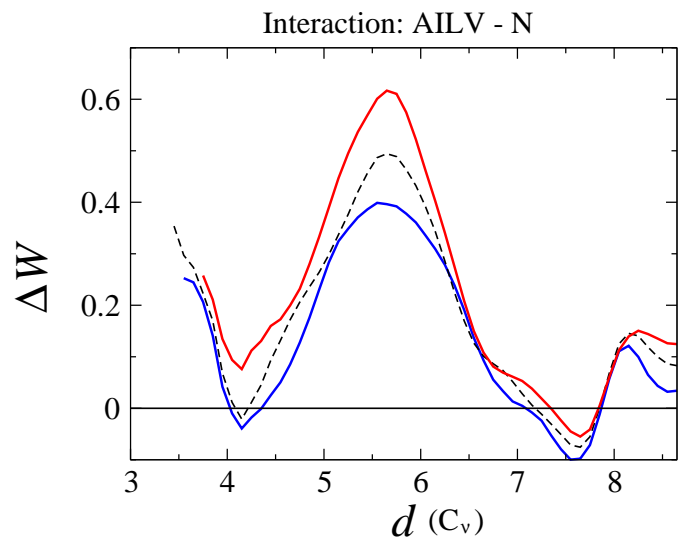

S63)

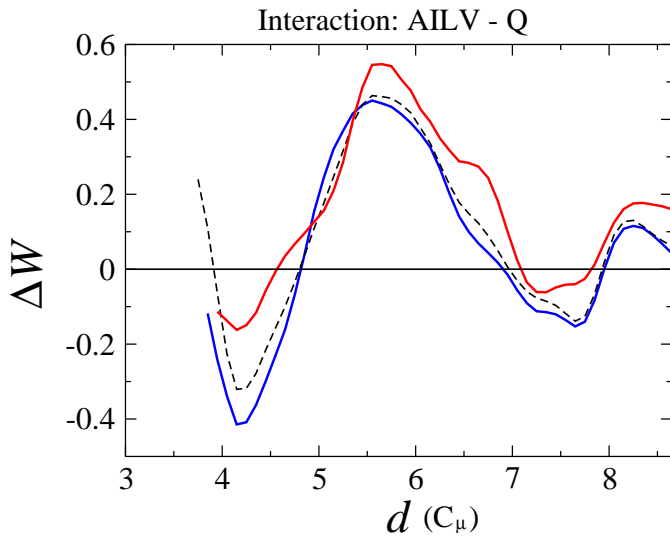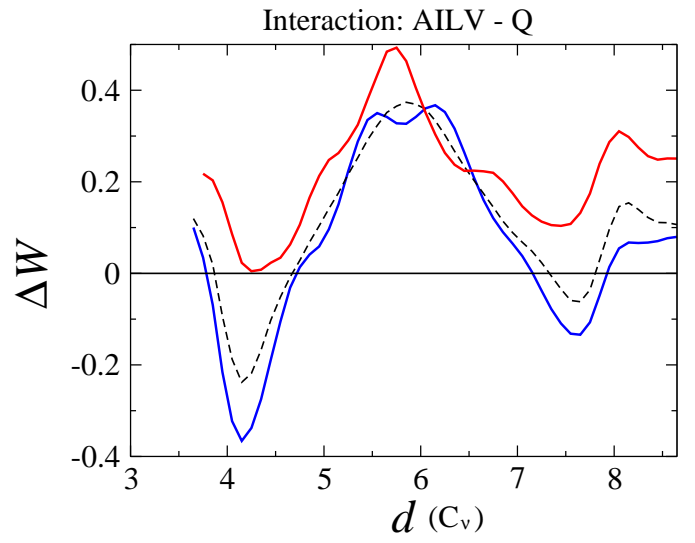

S64)

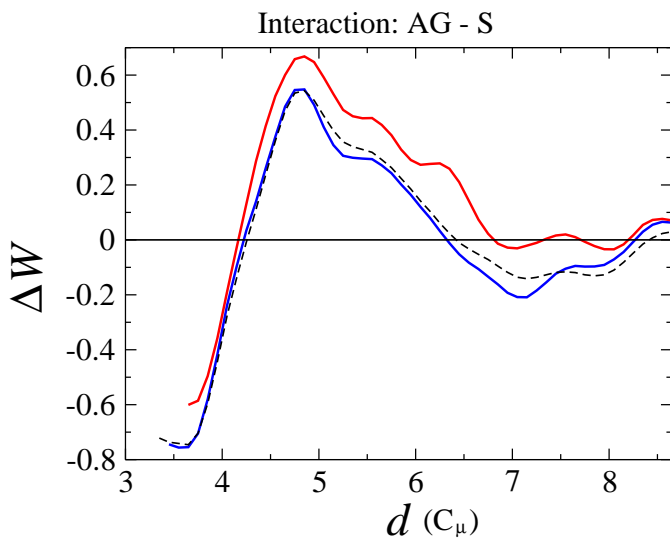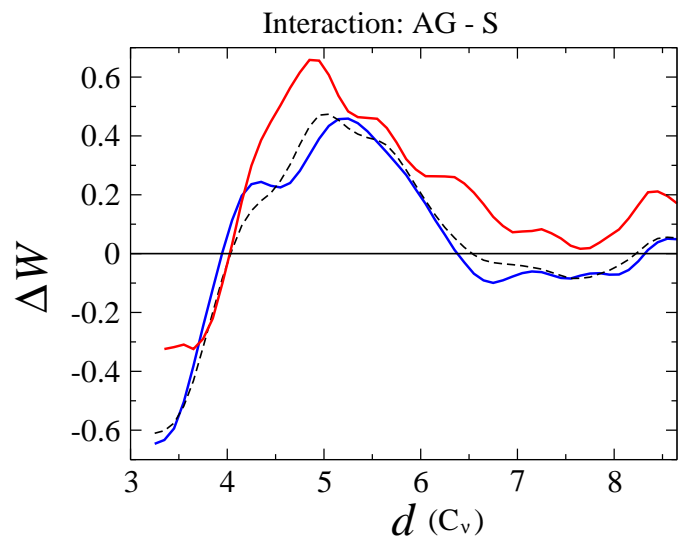

S65)

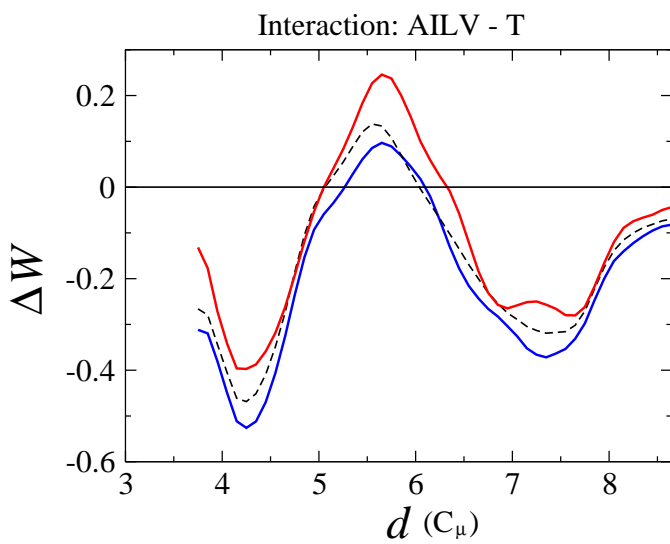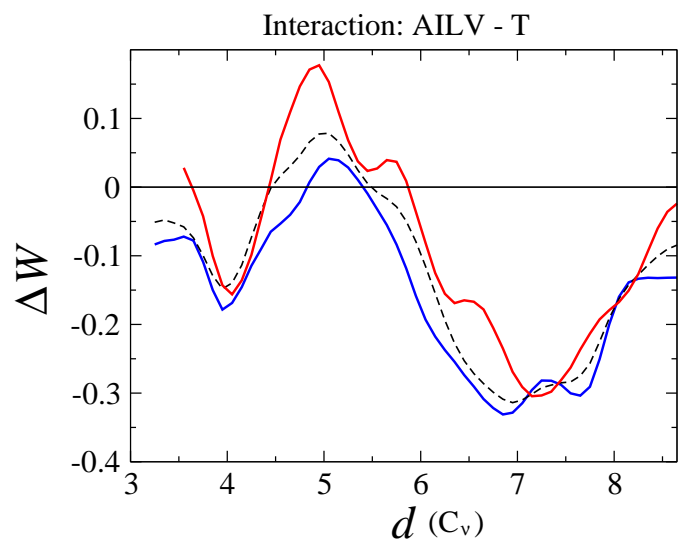



S66)

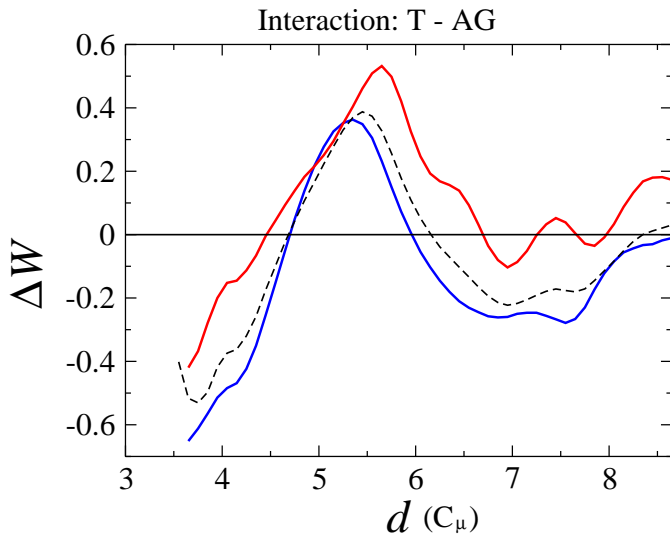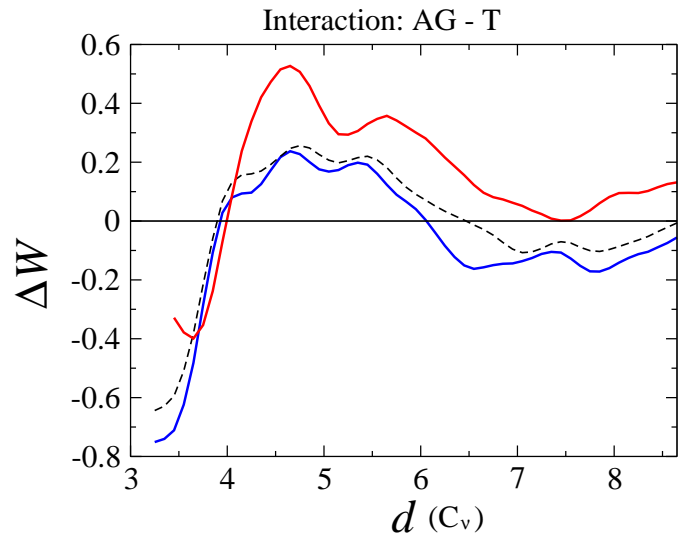

S67)

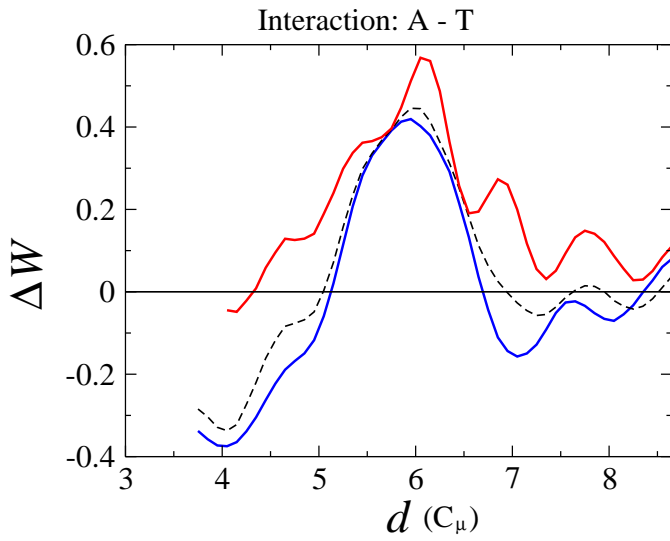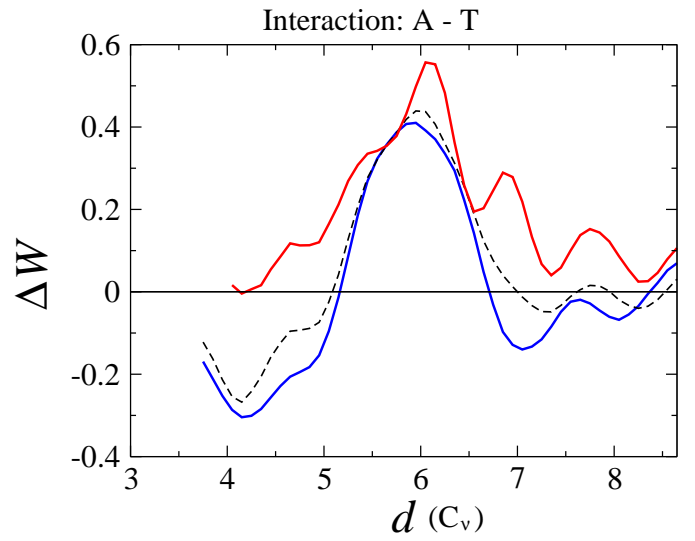

S68)

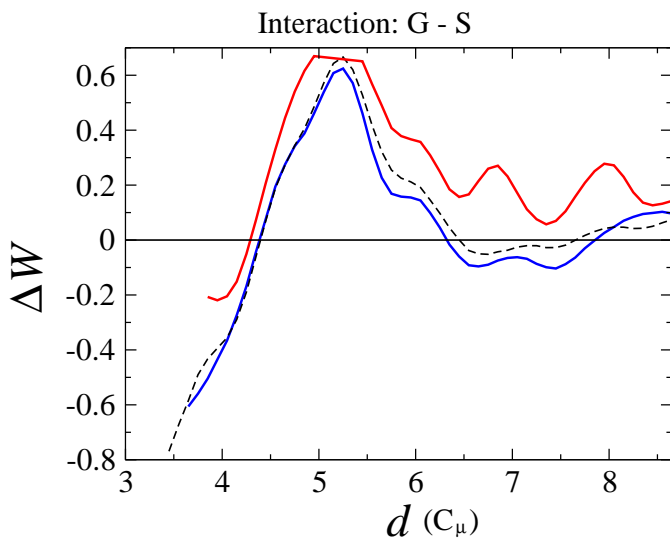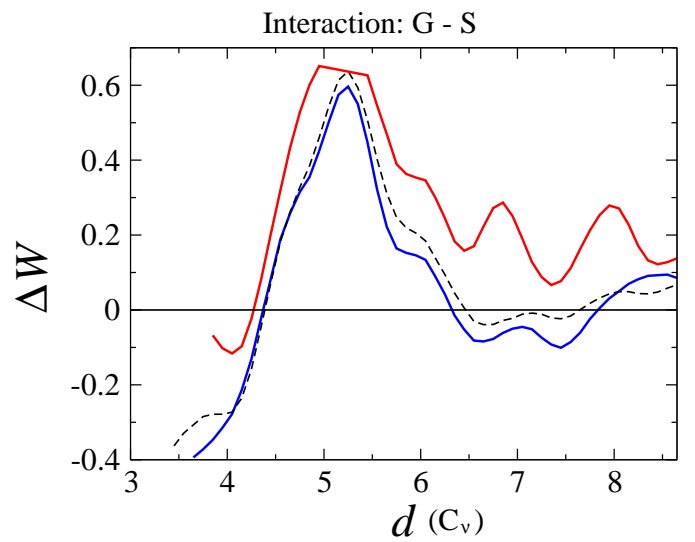

S69)

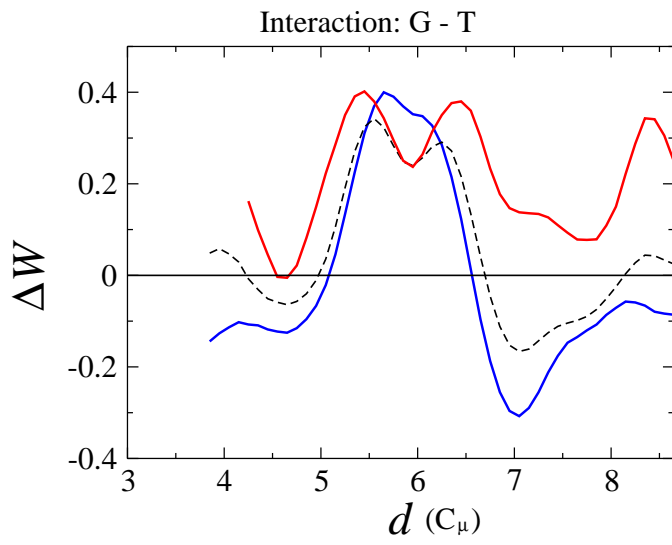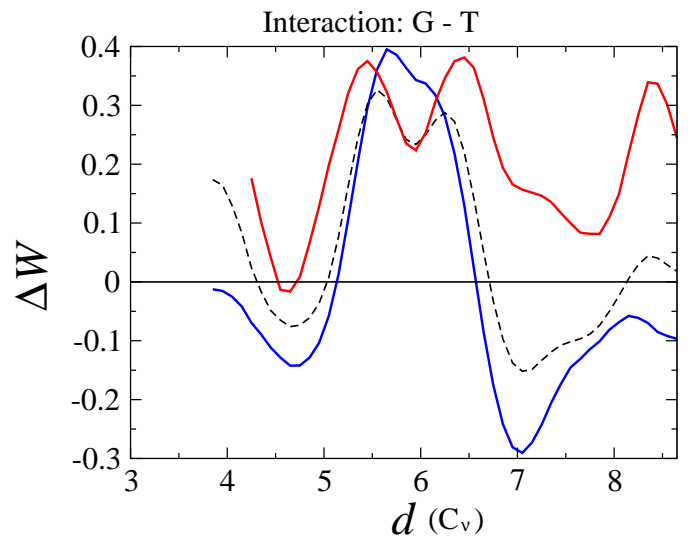

S70)

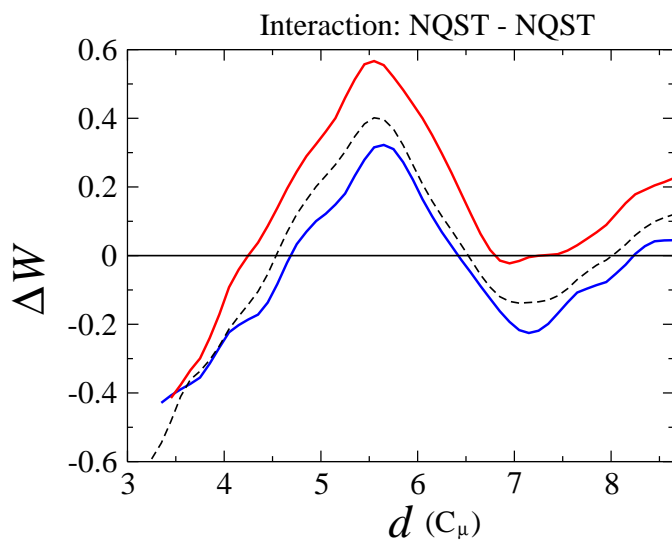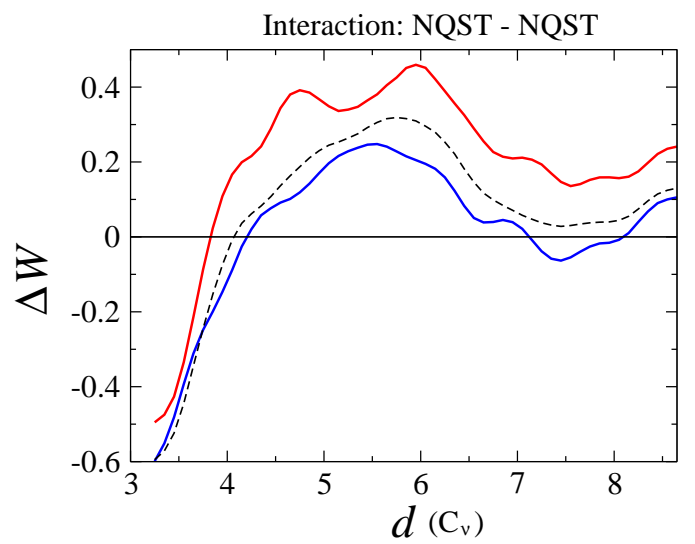

S71)

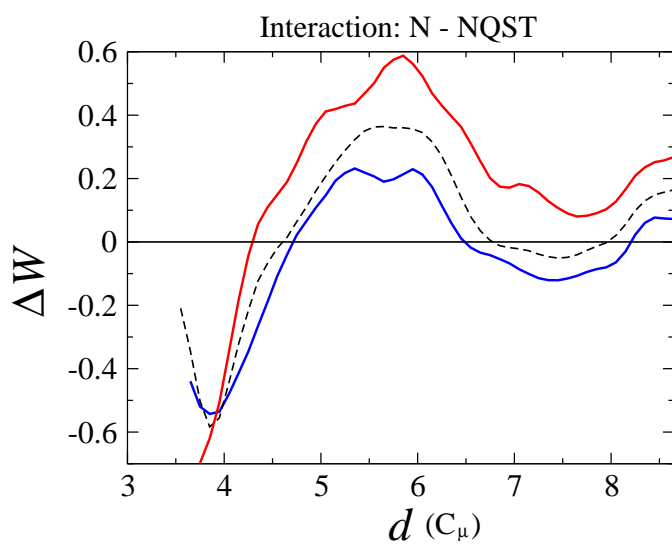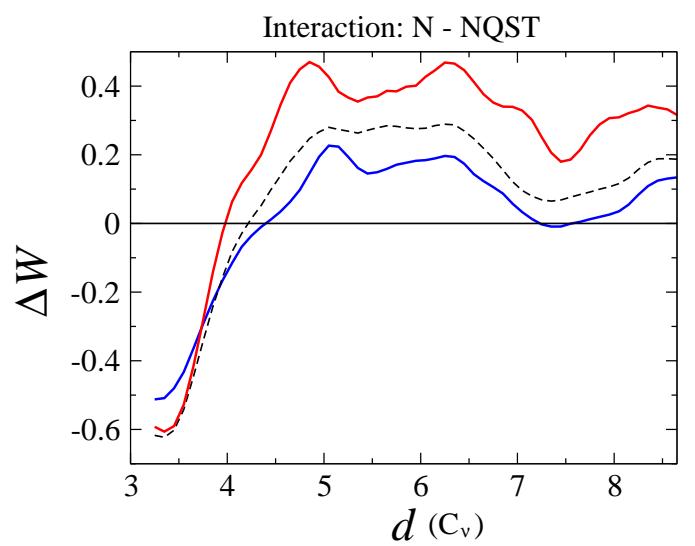

S72)

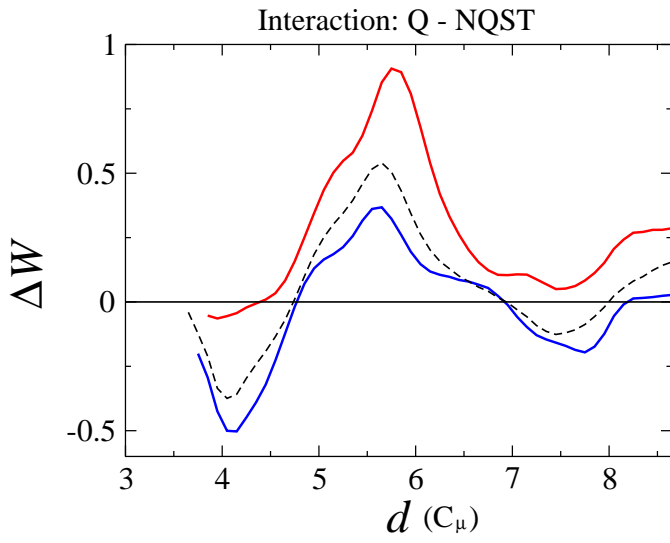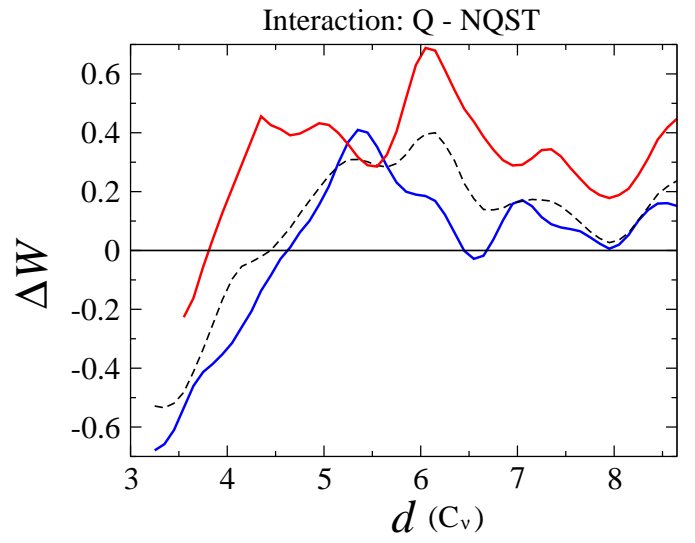

S73)

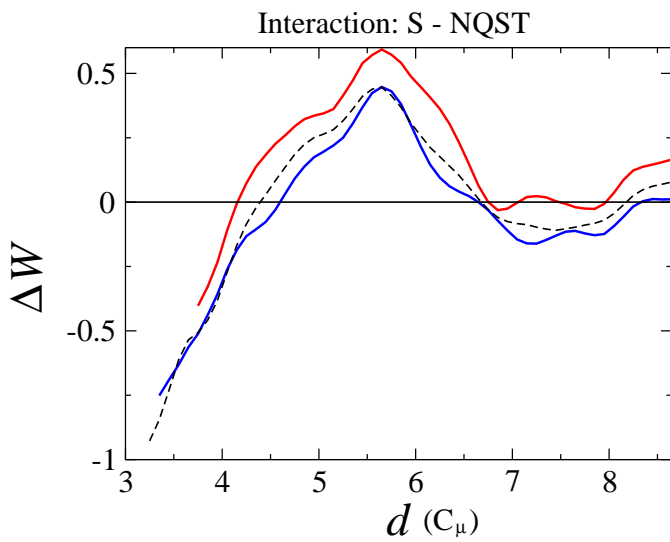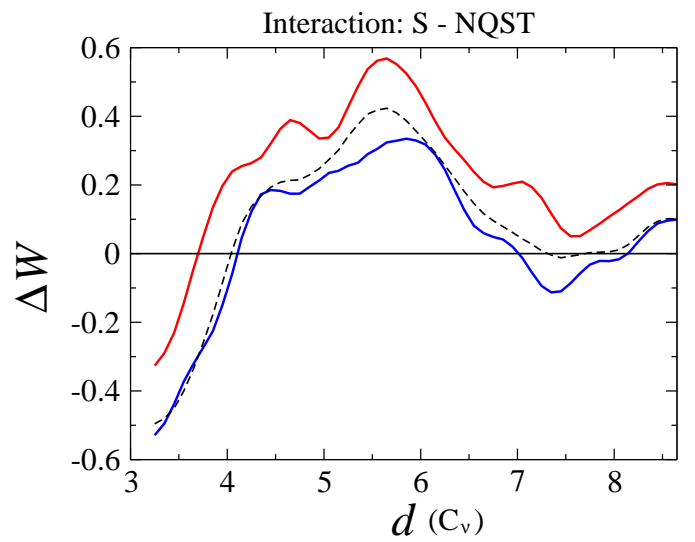

S74)

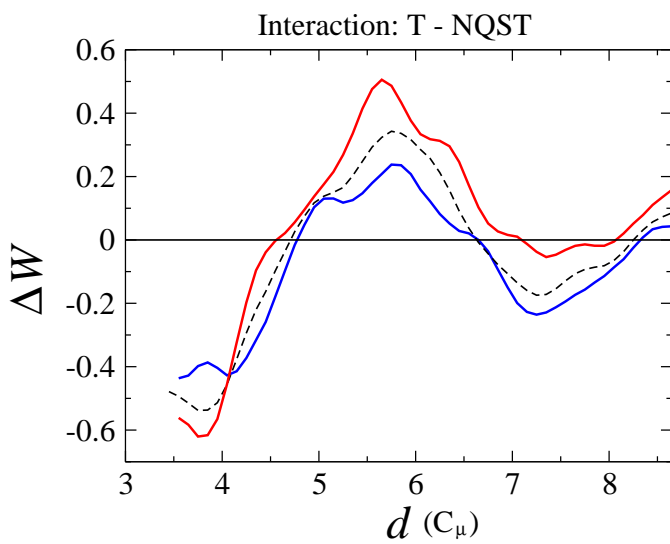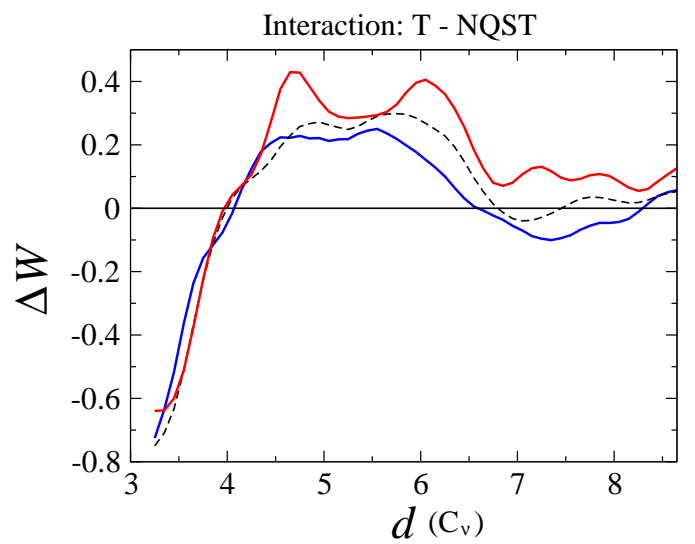

S75)

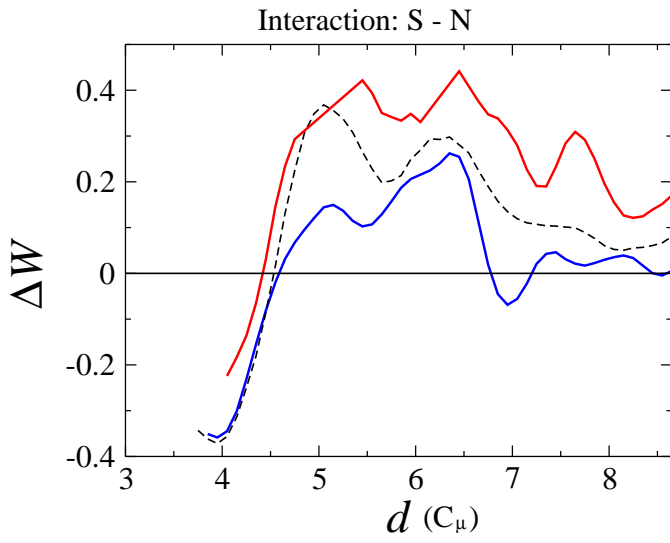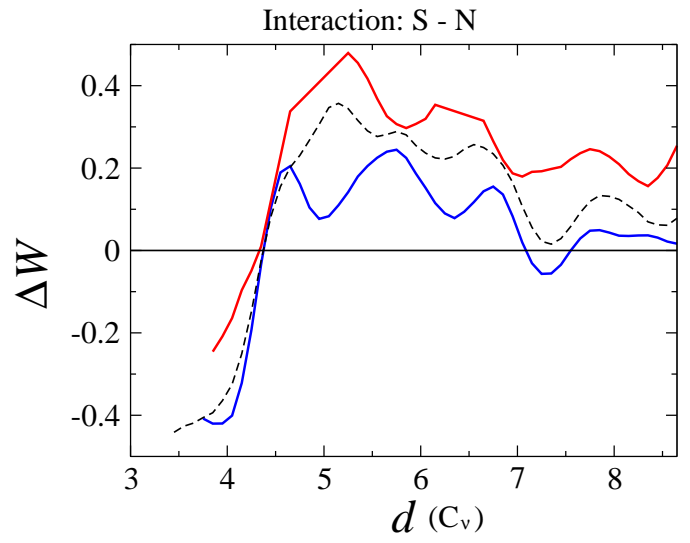

S76)

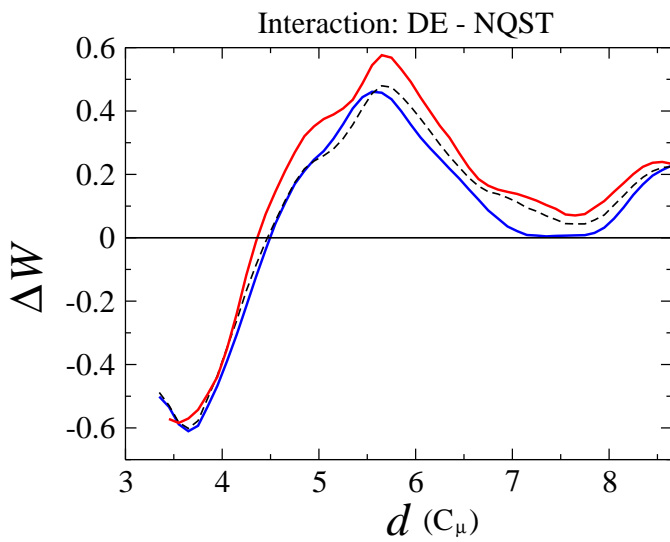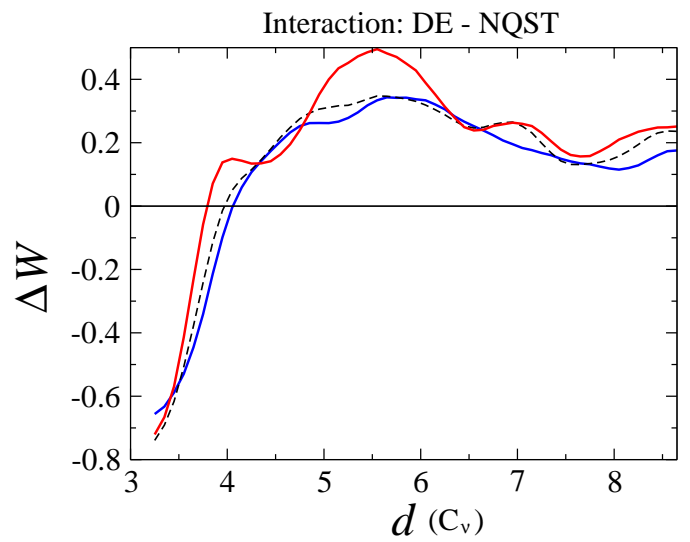

S77)

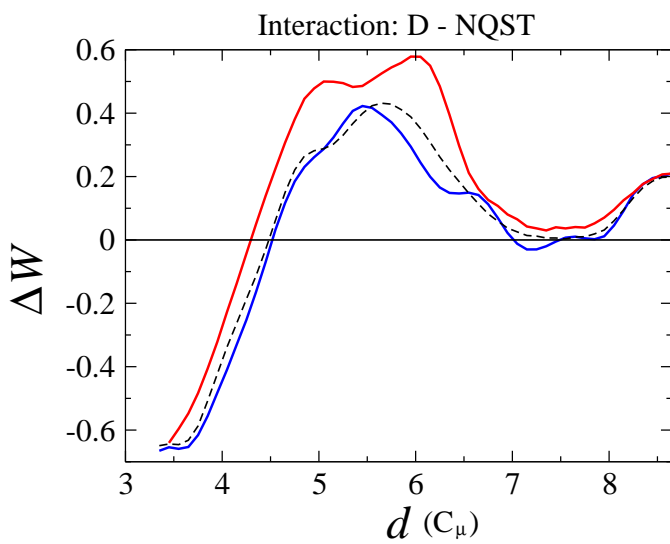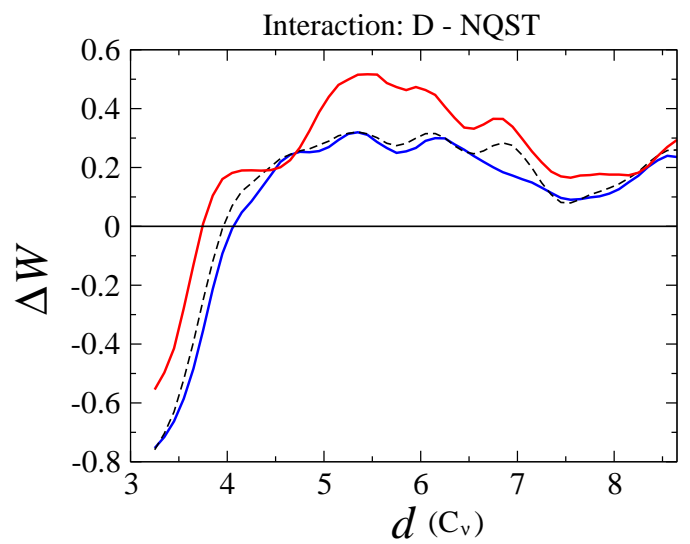

S78)

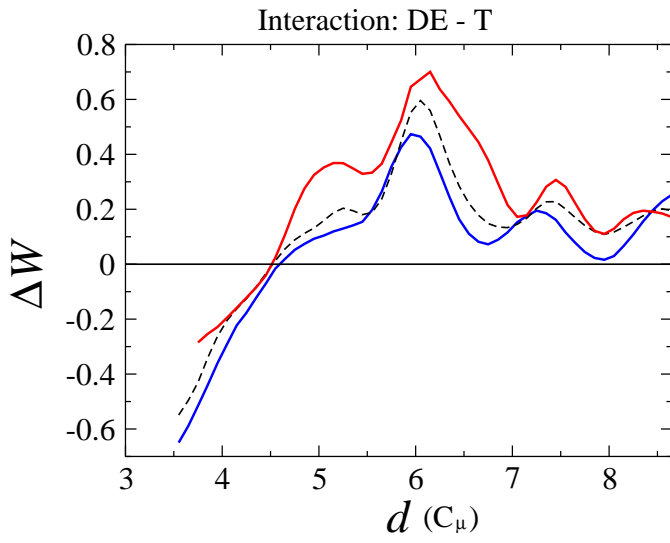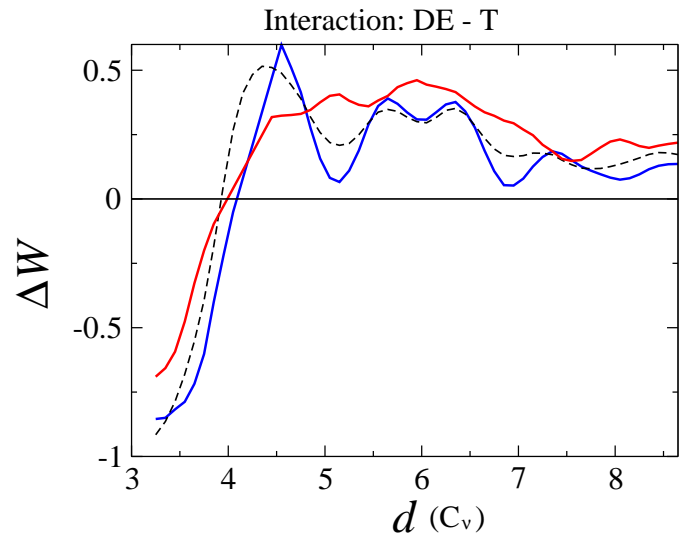

S79)

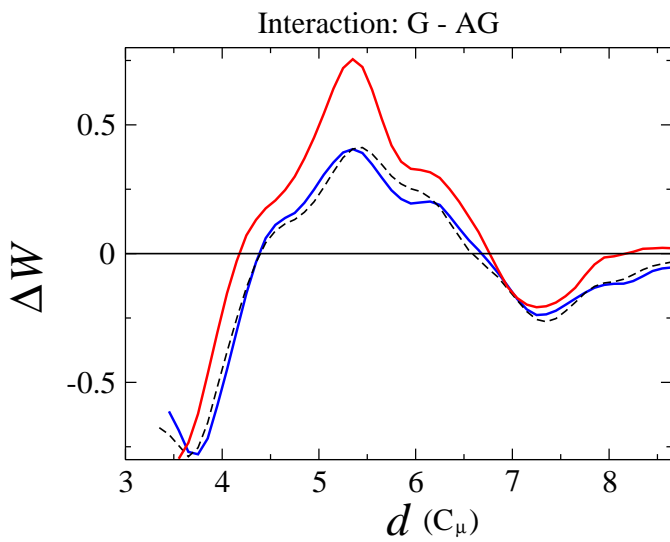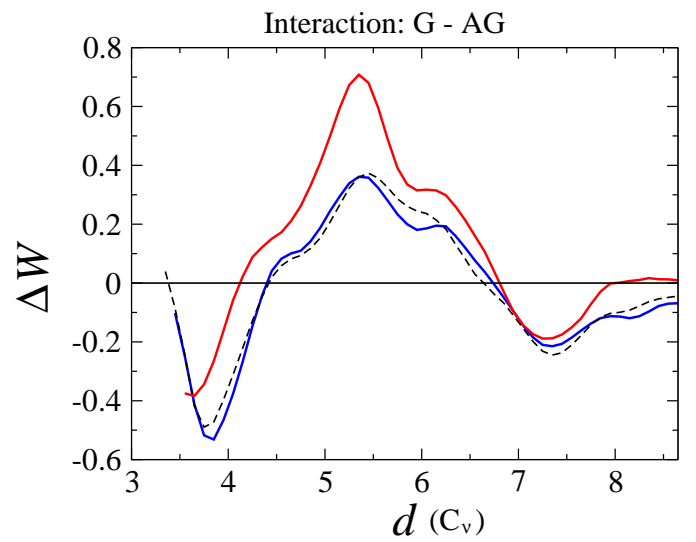

S80)

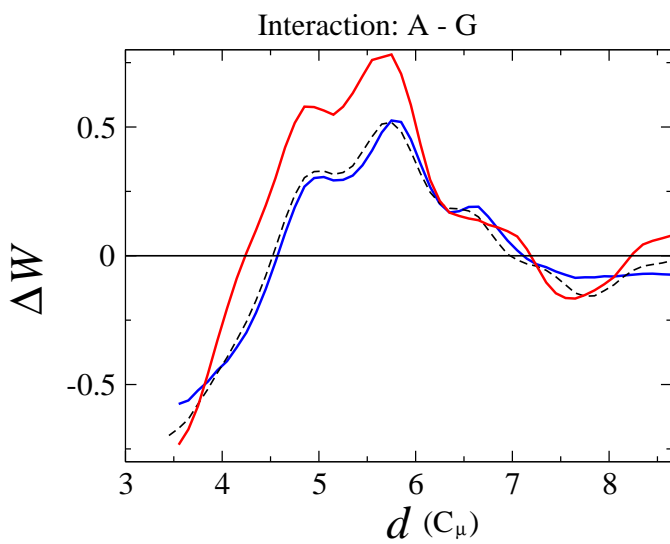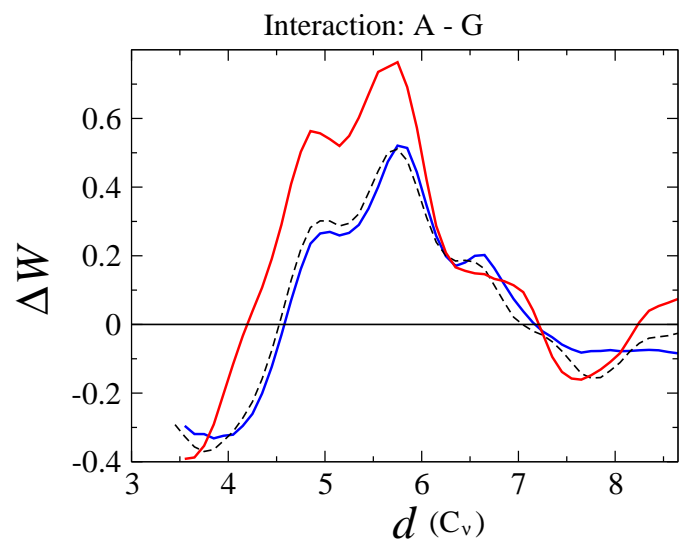

S81)

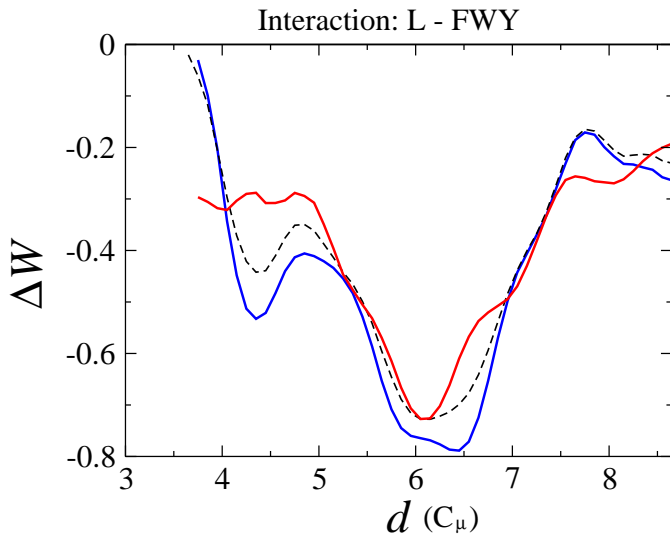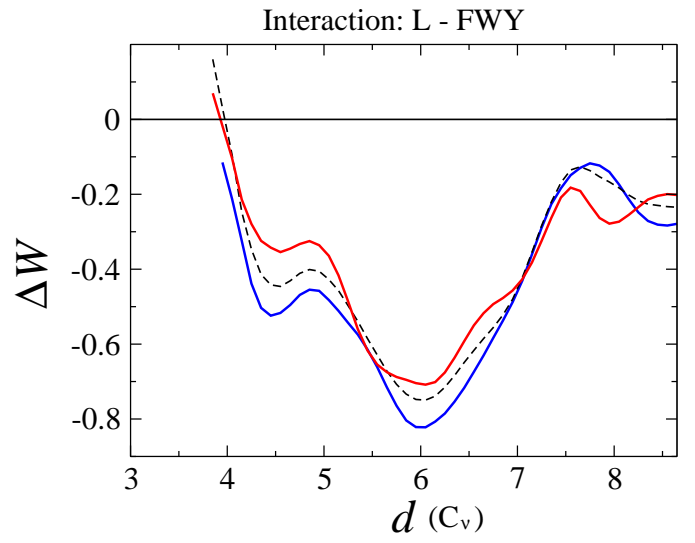

S82)

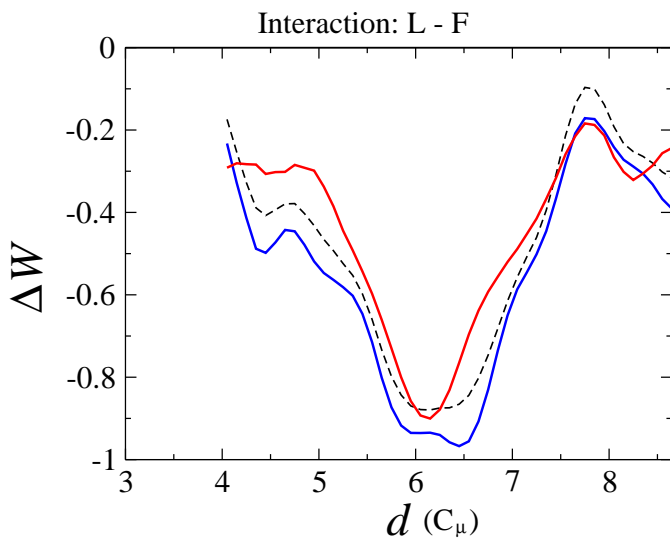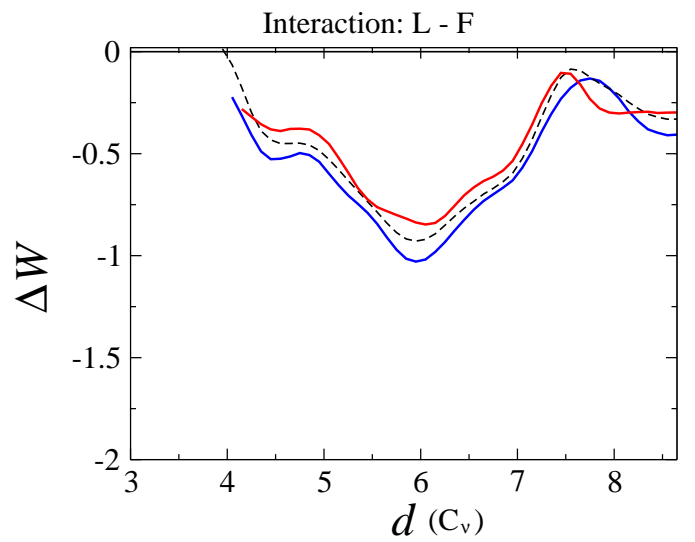

S83)

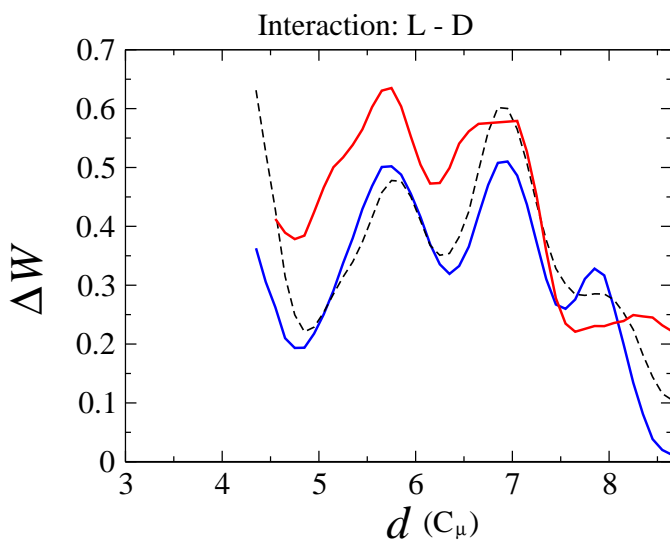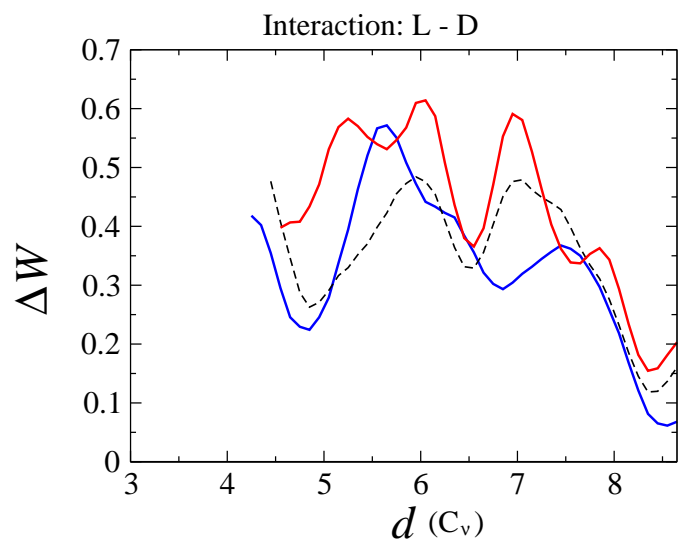

S84)

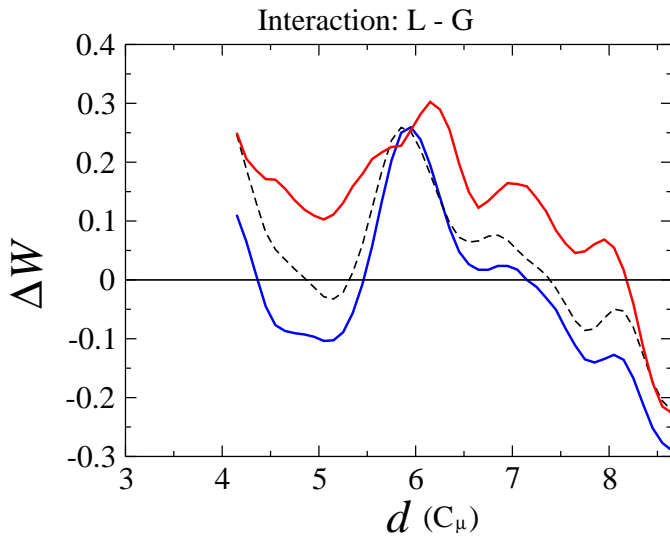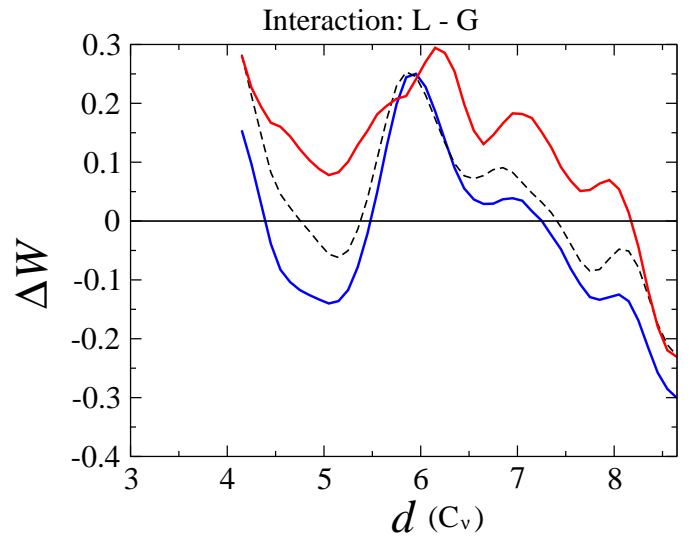

S85)

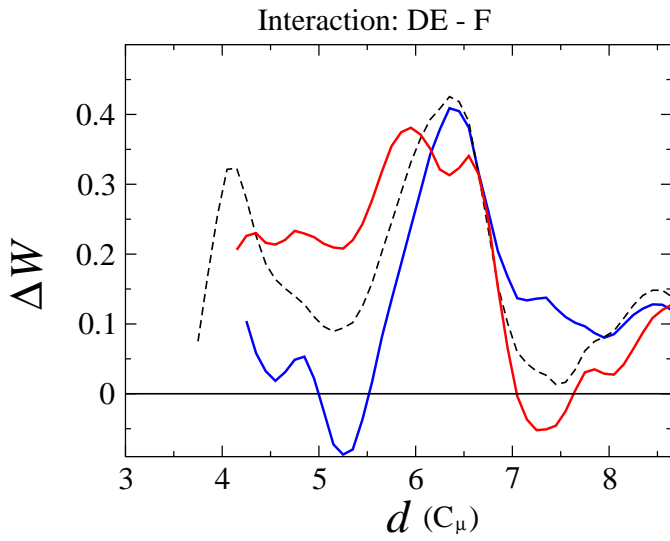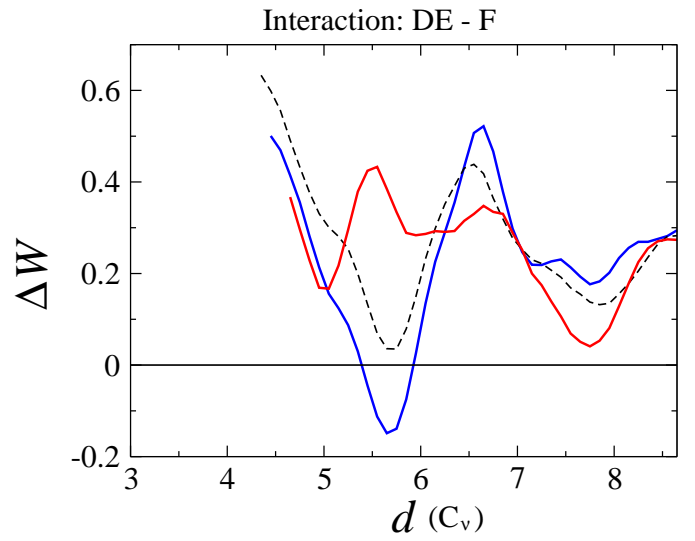

S86)

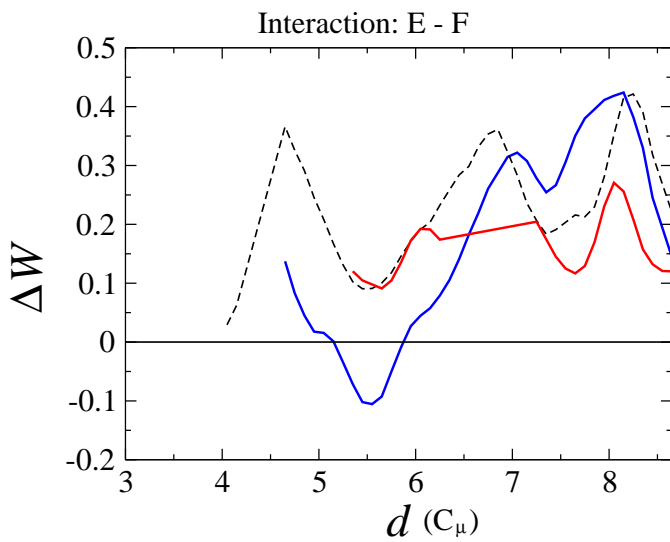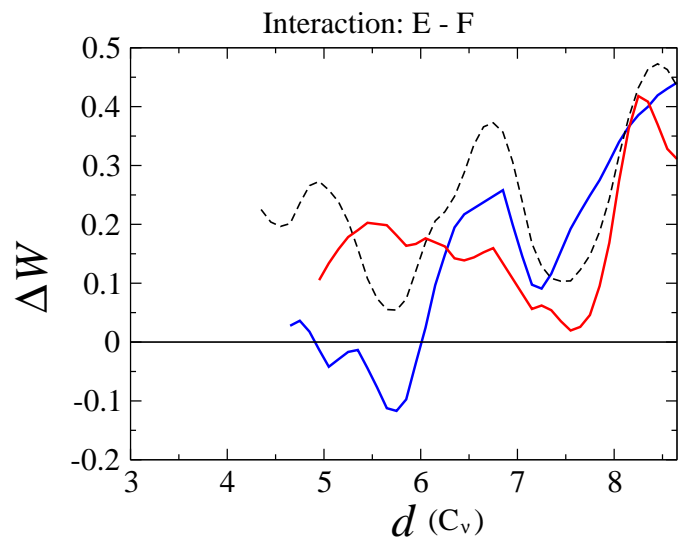

**Table S8 - Contact potentials for all thermostabilizing and mesostabilizing interactions given in Tables 1-2**

| Thermostabilizing interactions          |             |                                             |         |                                    |         |                           |         |                                             |         |                                    |         |                           |         |
|-----------------------------------------|-------------|---------------------------------------------|---------|------------------------------------|---------|---------------------------|---------|---------------------------------------------|---------|------------------------------------|---------|---------------------------|---------|
| Type of interaction                     | Interaction | Contact distance cutoff $D=6.0 \text{ \AA}$ |         |                                    |         |                           |         | Contact distance cutoff $D=8.0 \text{ \AA}$ |         |                                    |         |                           |         |
|                                         |             | $\Delta W_{\text{meso}}^*$                  |         | $\Delta W_{\text{thermo}}^\dagger$ |         | $\Delta\Delta W^\ddagger$ |         | $\Delta W_{\text{meso}}^*$                  |         | $\Delta W_{\text{thermo}}^\dagger$ |         | $\Delta\Delta W^\ddagger$ |         |
|                                         |             | $C_\mu$                                     | $C_\nu$ | $C_\mu$                            | $C_\nu$ | $C_\mu$                   | $C_\nu$ | $C_\mu$                                     | $C_\nu$ | $C_\mu$                            | $C_\nu$ | $C_\mu$                   | $C_\nu$ |
| Salt bridges                            | DE - KR     | -0.10                                       | -0.16   | -0.22                              | -0.28   | 0.12                      | 0.12    | 0.03                                        | -0.02   | -0.08                              | -0.10   | 0.11                      | 0.08    |
|                                         | D - KR      | -0.13                                       | -0.16   | -0.22                              | -0.27   | 0.10                      | 0.11    | 0.00                                        | -0.04   | -0.07                              | -0.10   | 0.08                      | 0.05    |
|                                         | E - KR      | -0.07                                       | -0.16   | -0.22                              | -0.28   | 0.15                      | 0.12    | 0.07                                        | 0.00    | -0.08                              | -0.11   | 0.15                      | 0.12    |
|                                         | DE - R      | -0.14                                       | -0.21   | -0.30                              | -0.36   | 0.16                      | 0.15    | -0.01                                       | -0.05   | -0.14                              | -0.16   | 0.13                      | 0.11    |
|                                         | D - R       | -0.17                                       | -0.22   | -0.32                              | -0.37   | 0.14                      | 0.14    | -0.06                                       | -0.09   | -0.15                              | -0.17   | 0.09                      | 0.08    |
|                                         | E - R       | -0.10                                       | -0.20   | -0.29                              | -0.36   | 0.19                      | 0.15    | 0.05                                        | -0.01   | -0.13                              | -0.15   | 0.17                      | 0.13    |
|                                         | E - H       | -0.09                                       | -0.10   | -0.19                              | -0.22   | 0.11                      | 0.12    | 0.01                                        | -0.01   | 0.01                               | 0.01    | 0.00                      | -0.02   |
| Cation- $\pi$ interactions              | KR - FWY    | 0.05                                        | 0.14    | -0.06                              | 0.01    | 0.11                      | 0.13    | 0.10                                        | 0.14    | -0.02                              | 0.00    | 0.12                      | 0.13    |
|                                         | R - FWY     | -0.07                                       | -0.00   | -0.16                              | -0.14   | 0.10                      | 0.13    | 0.01                                        | 0.01    | -0.12                              | -0.11   | 0.14                      | 0.12    |
|                                         | KR - W      | 0.15                                        | 0.17    | -0.12                              | 0.04    | 0.27                      | 0.13    | 0.14                                        | 0.20    | -0.09                              | -0.04   | 0.24                      | 0.25    |
|                                         | KR - Y      | -0.01                                       | 0.05    | -0.16                              | -0.14   | 0.14                      | 0.19    | 0.06                                        | 0.08    | -0.08                              | -0.09   | 0.14                      | 0.17    |
|                                         | K - F       | 0.25                                        | 0.46    | 0.21                               | 0.41    | 0.04                      | 0.06    | 0.26                                        | 0.33    | 0.23                               | 0.29    | 0.04                      | 0.04    |
|                                         | K - Y       | -0.01                                       | 0.11    | -0.08                              | -0.01   | 0.07                      | 0.12    | 0.07                                        | 0.14    | 0.01                               | 0.00    | 0.07                      | 0.13    |
|                                         | R - W       | -0.08                                       | -0.05   | -0.20                              | -0.06   | 0.12                      | 0.01    | 0.01                                        | 0.02    | -0.14                              | -0.13   | 0.15                      | 0.16    |
|                                         | R - Y       | -0.02                                       | -0.00   | -0.24                              | -0.26   | 0.22                      | 0.25    | 0.04                                        | 0.02    | -0.18                              | -0.18   | 0.22                      | 0.20    |
| Aromatic interactions                   | H - F       | 0.03                                        | 0.03    | -0.21                              | -0.29   | 0.24                      | 0.32    | 0.06                                        | 0.07    | -0.16                              | -0.22   | 0.22                      | 0.29    |
|                                         | F - FWY     | -0.51                                       | -0.55   | -0.61                              | -0.66   | 0.10                      | 0.11    | -0.42                                       | -0.42   | -0.53                              | -0.53   | 0.11                      | 0.11    |
| Negatively charged - Y or W             | F - W       | -0.31                                       | -0.36   | -0.57                              | -0.63   | 0.25                      | 0.27    | -0.42                                       | -0.41   | -0.57                              | -0.58   | 0.15                      | 0.16    |
|                                         | DE - W      | 0.23                                        | 0.24    | 0.06                               | 0.05    | 0.17                      | 0.19    | 0.14                                        | 0.10    | -0.01                              | -0.01   | 0.15                      | 0.11    |
| Small - charged                         | DE - Y      | 0.00                                        | -0.01   | -0.10                              | -0.09   | 0.10                      | 0.08    | 0.10                                        | 0.10    | -0.05                              | -0.03   | 0.15                      | 0.13    |
|                                         | D - W       | 0.25                                        | 0.23    | 0.12                               | 0.10    | 0.13                      | 0.13    | 0.13                                        | 0.09    | -0.02                              | -0.02   | 0.15                      | 0.10    |
|                                         | D - Y       | 0.03                                        | 0.02    | -0.08                              | -0.07   | 0.12                      | 0.10    | 0.13                                        | 0.13    | -0.06                              | -0.03   | 0.19                      | 0.17    |
|                                         | AG - KR     | 0.37                                        | 0.35    | 0.26                               | 0.25    | 0.11                      | 0.10    | 0.23                                        | 0.24    | 0.16                               | 0.17    | 0.07                      | 0.07    |
| Cysteine - uncharged                    | G - KR      | 0.30                                        | 0.27    | 0.19                               | 0.14    | 0.11                      | 0.13    | 0.20                                        | 0.19    | 0.08                               | 0.09    | 0.11                      | 0.10    |
|                                         | AG - R      | 0.30                                        | 0.29    | 0.15                               | 0.13    | 0.15                      | 0.17    | 0.20                                        | 0.16    | 0.06                               | 0.06    | 0.15                      | 0.10    |
|                                         | G - H       | 0.17                                        | 0.16    | 0.12                               | 0.10    | 0.05                      | 0.06    | 0.12                                        | 0.12    | 0.01                               | 0.02    | 0.11                      | 0.09    |
|                                         | G - R       | 0.23                                        | 0.21    | 0.03                               | -0.02   | 0.20                      | 0.23    | 0.16                                        | 0.11    | -0.04                              | -0.04   | 0.21                      | 0.15    |
|                                         | AG - E      | 0.53                                        | 0.53    | 0.42                               | 0.43    | 0.11                      | 0.10    | 0.37                                        | 0.39    | 0.27                               | 0.27    | 0.09                      | 0.11    |
|                                         | A - E       | 0.64                                        | 0.67    | 0.38                               | 0.40    | 0.26                      | 0.26    | 0.45                                        | 0.46    | 0.28                               | 0.28    | 0.17                      | 0.18    |
|                                         | C - AILV    | -0.18                                       | -0.20   | -0.33                              | -0.39   | 0.15                      | 0.19    | -0.18                                       | -0.23   | -0.35                              | -0.35   | 0.17                      | 0.13    |
| Isoleucine - hydrophobic or small       | C - AG      | 0.29                                        | 0.21    | -0.04                              | -0.10   | 0.33                      | 0.31    | 0.01                                        | -0.02   | -0.23                              | -0.26   | 0.24                      | 0.25    |
|                                         | C - G       | 0.38                                        | 0.32    | -0.11                              | -0.21   | 0.48                      | 0.53    | 0.03                                        | 0.03    | -0.29                              | -0.34   | 0.32                      | 0.37    |
|                                         | C - FWY     | -0.25                                       | -0.29   | -0.57                              | -0.59   | 0.32                      | 0.30    | -0.16                                       | -0.17   | -0.53                              | -0.54   | 0.36                      | 0.37    |
|                                         | C - NQST    | 0.20                                        | 0.18    | -0.02                              | 0.00    | 0.22                      | 0.18    | 0.04                                        | 0.02    | -0.10                              | -0.10   | 0.14                      | 0.12    |
|                                         | I - AILV    | -0.55                                       | -0.55   | -0.65                              | -0.65   | 0.10                      | 0.10    | -0.44                                       | -0.44   | -0.54                              | -0.54   | 0.10                      | 0.10    |
| Methionine - charged, aromatic or small | I - I       | -0.61                                       | -0.61   | -0.82                              | -0.83   | 0.22                      | 0.22    | -0.50                                       | -0.50   | -0.74                              | -0.73   | 0.24                      | 0.24    |
|                                         | I - AG      | -0.09                                       | -0.10   | -0.25                              | -0.25   | 0.16                      | 0.16    | -0.10                                       | -0.09   | -0.22                              | -0.22   | 0.13                      | 0.13    |
|                                         | I - A       | -0.25                                       | -0.25   | -0.47                              | -0.47   | 0.22                      | 0.22    | -0.19                                       | -0.18   | -0.38                              | -0.37   | 0.19                      | 0.19    |
|                                         | I - FWY     | -0.44                                       | -0.47   | -0.53                              | -0.55   | 0.09                      | 0.08    | -0.37                                       | -0.37   | -0.47                              | -0.47   | 0.10                      | 0.10    |
|                                         | I - W       | -0.32                                       | -0.38   | -0.39                              | -0.44   | 0.07                      | 0.06    | -0.26                                       | -0.26   | -0.45                              | -0.45   | 0.19                      | 0.19    |
|                                         | I - Y       | -0.31                                       | -0.32   | -0.47                              | -0.48   | 0.16                      | 0.15    | -0.25                                       | -0.24   | -0.39                              | -0.38   | 0.14                      | 0.14    |
|                                         | M - KR      | 0.15                                        | 0.33    | 0.07                               | 0.32    | 0.09                      | 0.00    | 0.29                                        | 0.29    | 0.17                               | 0.19    | 0.12                      | 0.10    |
| Others                                  | M - DE      | 0.29                                        | 0.30    | 0.09                               | 0.14    | 0.20                      | 0.17    | 0.25                                        | 0.26    | 0.11                               | 0.10    | 0.15                      | 0.16    |
|                                         | M - FWY     | -0.49                                       | -0.54   | -0.64                              | -0.65   | 0.15                      | 0.10    | -0.39                                       | -0.39   | -0.51                              | -0.51   | 0.12                      | 0.12    |
|                                         | M - Y       | -0.34                                       | -0.34   | -0.54                              | -0.54   | 0.20                      | 0.20    | -0.18                                       | -0.18   | -0.43                              | -0.42   | 0.25                      | 0.24    |
|                                         | M - A       | -0.22                                       | -0.22   | -0.33                              | -0.34   | 0.11                      | 0.11    | -0.21                                       | -0.20   | -0.29                              | -0.29   | 0.09                      | 0.09    |
|                                         | Y - AILV    | -0.29                                       | -0.30   | -0.38                              | -0.38   | 0.09                      | 0.08    | -0.22                                       | -0.21   | -0.30                              | -0.29   | 0.08                      | 0.08    |
| Others                                  | Y - V       | -0.25                                       | -0.25   | -0.38                              | -0.39   | 0.13                      | 0.14    | -0.17                                       | -0.17   | -0.32                              | -0.31   | 0.15                      | 0.15    |
|                                         | R - KR      | 0.41                                        | 0.24    | 0.49                               | 0.29    | -0.08                     | -0.05   | 0.32                                        | 0.21    | 0.29                               | 0.20    | 0.03                      | 0.01    |
|                                         | E - N       | 0.21                                        | 0.19    | 0.14                               | 0.12    | 0.06                      | 0.07    | 0.21                                        | 0.18    | 0.17                               | 0.20    | 0.04                      | -0.02   |
|                                         | R - N       | 0.17                                        | 0.14    | 0.24                               | 0.17    | -0.07                     | -0.03   | 0.18                                        | 0.17    | 0.08                               | 0.12    | 0.09                      | 0.06    |
|                                         | V - KR      | 0.20                                        | 0.42    | 0.14                               | 0.34    | 0.06                      | 0.08    | 0.22                                        | 0.26    | 0.13                               | 0.20    | 0.09                      | 0.07    |
|                                         | F - P       | 0.02                                        | 0.03    | -0.10                              | -0.15   | 0.12                      | 0.18    | 0.02                                        | 0.04    | -0.07                              | -0.06   | 0.09                      | 0.10    |
|                                         | N - P       | 0.27                                        | 0.24    | 0.32                               | 0.33    | -0.04                     | -0.09   | 0.20                                        | 0.22    | 0.19                               | 0.20    | 0.01                      | 0.02    |
|                                         | T - Y       | 0.07                                        | 0.19    | 0.00                               | 0.09    | 0.07                      | 0.10    | 0.01                                        | -0.01   | -0.03                              | -0.01   | 0.04                      | 0.00    |



| Mesostabilizing interactions          |             |                                             |         |                                    |         |                           |         |                                             |         |                                    |         |                           |         |
|---------------------------------------|-------------|---------------------------------------------|---------|------------------------------------|---------|---------------------------|---------|---------------------------------------------|---------|------------------------------------|---------|---------------------------|---------|
| Type of interaction                   | Interaction | Contact distance cutoff $D=6.0 \text{ \AA}$ |         |                                    |         |                           |         | Contact distance cutoff $D=8.0 \text{ \AA}$ |         |                                    |         |                           |         |
|                                       |             | $\Delta W_{\text{meso}}^*$                  |         | $\Delta W_{\text{thermo}}^\dagger$ |         | $\Delta\Delta W^\ddagger$ |         | $\Delta W_{\text{meso}}^*$                  |         | $\Delta W_{\text{thermo}}^\dagger$ |         | $\Delta\Delta W^\ddagger$ |         |
|                                       |             | $C_\mu$                                     | $C_\nu$ | $C_\mu$                            | $C_\nu$ | $C_\mu$                   | $C_\nu$ | $C_\mu$                                     | $C_\nu$ | $C_\mu$                            | $C_\nu$ | $C_\mu$                   | $C_\nu$ |
| Aliphatic or small - noncharged polar | AILV - NQST | 0.12                                        | 0.17    | 0.21                               | 0.25    | -0.09                     | -0.09   | 0.06                                        | 0.06    | 0.14                               | 0.15    | -0.08                     | -0.08   |
|                                       | AG - NQST   | 0.20                                        | 0.18    | 0.33                               | 0.33    | -0.13                     | -0.14   | 0.07                                        | 0.07    | 0.23                               | 0.23    | -0.15                     | -0.16   |
|                                       | A - NQST    | 0.22                                        | 0.22    | 0.36                               | 0.35    | -0.14                     | -0.13   | 0.11                                        | 0.11    | 0.24                               | 0.26    | -0.14                     | -0.15   |
|                                       | G - NQST    | 0.17                                        | 0.15    | 0.31                               | 0.31    | -0.13                     | -0.16   | 0.05                                        | 0.03    | 0.21                               | 0.20    | -0.17                     | -0.16   |
|                                       | L - NQST    | 0.04                                        | 0.10    | 0.17                               | 0.24    | -0.13                     | -0.14   | 0.02                                        | 0.02    | 0.14                               | 0.14    | -0.12                     | -0.12   |
|                                       | AILV - N    | 0.28                                        | 0.30    | 0.39                               | 0.41    | -0.11                     | -0.11   | 0.20                                        | 0.21    | 0.27                               | 0.30    | -0.08                     | -0.09   |
|                                       | AILV - Q    | 0.14                                        | 0.15    | 0.28                               | 0.32    | -0.15                     | -0.17   | 0.16                                        | 0.15    | 0.28                               | 0.30    | -0.12                     | -0.15   |
|                                       | AG - S      | 0.23                                        | 0.21    | 0.36                               | 0.34    | -0.14                     | -0.13   | 0.08                                        | 0.09    | 0.23                               | 0.24    | -0.15                     | -0.15   |
|                                       | AILV - T    | -0.04                                       | 0.06    | 0.05                               | 0.15    | -0.09                     | -0.09   | -0.08                                       | -0.08   | -0.00                              | -0.01   | -0.08                     | -0.07   |
|                                       | AG - T      | 0.08                                        | 0.07    | 0.25                               | 0.28    | -0.18                     | -0.21   | -0.02                                       | -0.03   | 0.18                               | 0.19    | -0.21                     | -0.22   |
|                                       | A - T       | 0.05                                        | 0.06    | 0.26                               | 0.28    | -0.22                     | -0.22   | -0.01                                       | -0.01   | 0.16                               | 0.19    | -0.17                     | -0.20   |
| G - S                                 | 0.14        | 0.13                                        | 0.36    | 0.36                               | -0.22   | -0.22                     | 0.05    | 0.05                                        | 0.25    | 0.25                               | -0.20   | -0.21                     |         |
| G - T                                 | 0.11        | 0.07                                        | 0.25    | 0.28                               | -0.14   | -0.21                     | -0.04   | -0.05                                       | 0.21    | 0.19                               | -0.24   | -0.24                     |         |
| Noncharged polar - noncharged polar   | NQST - NQST | 0.10                                        | 0.10    | 0.28                               | 0.28    | -0.18                     | -0.19   | 0.06                                        | 0.04    | 0.24                               | 0.23    | -0.18                     | -0.18   |
|                                       | N - NQST    | 0.10                                        | 0.09    | 0.31                               | 0.29    | -0.22                     | -0.20   | 0.07                                        | 0.07    | 0.30                               | 0.29    | -0.22                     | -0.22   |
|                                       | Q - NQST    | 0.08                                        | 0.06    | 0.40                               | 0.39    | -0.31                     | -0.33   | 0.08                                        | 0.07    | 0.36                               | 0.33    | -0.28                     | -0.26   |
|                                       | S - NQST    | 0.18                                        | 0.15    | 0.35                               | 0.33    | -0.18                     | -0.18   | 0.08                                        | 0.06    | 0.23                               | 0.22    | -0.15                     | -0.16   |
|                                       | T - NQST    | 0.07                                        | 0.09    | 0.16                               | 0.21    | -0.09                     | -0.11   | 0.02                                        | 0.01    | 0.15                               | 0.13    | -0.13                     | -0.12   |
| S - N                                 | 0.07        | 0.06                                        | 0.34    | 0.31                               | -0.27   | -0.25                     | 0.05    | 0.04                                        | 0.27    | 0.25                               | -0.22   | -0.21                     |         |
| Negatively charged - noncharged polar | DE - NQST   | 0.20                                        | 0.17    | 0.28                               | 0.26    | -0.08                     | -0.09   | 0.18                                        | 0.16    | 0.26                               | 0.24    | -0.09                     | -0.07   |
|                                       | D - NQST    | 0.19                                        | 0.15    | 0.36                               | 0.31    | -0.17                     | -0.17   | 0.16                                        | 0.15    | 0.28                               | 0.26    | -0.12                     | -0.11   |
| Small - small                         | DE - T      | 0.13                                        | 0.14    | 0.31                               | 0.32    | -0.18                     | -0.18   | 0.13                                        | 0.12    | 0.27                               | 0.26    | -0.14                     | -0.14   |
|                                       | G - AG      | 0.13                                        | 0.13    | 0.32                               | 0.32    | -0.19                     | -0.19   | 0.03                                        | 0.03    | 0.13                               | 0.14    | -0.10                     | -0.10   |
| Leucine - other                       | A - G       | 0.15                                        | 0.15    | 0.33                               | 0.33    | -0.18                     | -0.18   | 0.05                                        | 0.05    | 0.12                               | 0.13    | -0.07                     | -0.07   |
|                                       | L - FWY     | -0.57                                       | -0.61   | -0.50                              | -0.52   | -0.07                     | -0.10   | -0.47                                       | -0.47   | -0.42                              | -0.42   | -0.05                     | -0.05   |
|                                       | L - F       | -0.70                                       | -0.76   | -0.60                              | -0.62   | -0.11                     | -0.14   | -0.59                                       | -0.59   | -0.49                              | -0.49   | -0.10                     | -0.10   |
|                                       | L - D       | 0.39                                        | 0.43    | 0.54                               | 0.58    | -0.15                     | -0.15   | 0.33                                        | 0.33    | 0.44                               | 0.44    | -0.11                     | -0.11   |
| Negatively charged - F                | L - G       | 0.06                                        | 0.06    | 0.21                               | 0.21    | -0.15                     | -0.15   | -0.03                                       | -0.02   | 0.13                               | 0.13    | -0.16                     | -0.16   |
|                                       | DE - F      | 0.17                                        | 0.18    | 0.34                               | 0.38    | -0.16                     | -0.20   | 0.23                                        | 0.22    | 0.26                               | 0.26    | -0.02                     | -0.04   |
|                                       | E - F       | 0.07                                        | 0.06    | 0.20                               | 0.24    | -0.13                     | -0.18   | 0.19                                        | 0.17    | 0.20                               | 0.22    | -0.02                     | -0.05   |

\*  $\Delta W_{\text{meso}}$  is the value of the contact potential (in kcal/mol) derived from the mesostable protein subset

†  $\Delta W_{\text{thermo}}$  is the value of the contact potential (in kcal/mol) derived from the thermostable protein subset

‡  $\Delta\Delta W = \Delta W_{\text{meso}} - \Delta W_{\text{thermo}}$
